# Supplementary material for: Palladium-catalyzed intramolecular diastereoselective dearomatization reaction of indoles with N-tosylhydrazones
Source: Royal Society of Chemistry journal article supplement (doi:10.1039/d1qo00893e), 2021-01-01
Supplement: d1qo00893e1.pdf [file d1qo00893e1.pdf]

# Palladium-Catalyzed Intramolecular Diastereoselective Dearomatization Reaction of Indoles with *N*-Tosylhydrazones

Shao-Bo Duan,<sup>a</sup> Hong-Yu Zhang,<sup>a</sup> Bo-Ya Hao,<sup>a</sup> Jiquan Zhao,<sup>a</sup> Ya-Ping Han,<sup>a,\*</sup> Yuecheng Zhang,<sup>a,\*</sup> and Yong-Min Liang<sup>b</sup>

<sup>a</sup>School of Chemical Engineering and Technology, Hebei University of Technology, Tianjin 300130, People's Republic of China E-mail: 2019070@hebut.edu.cn; yczhang@hebut.edu.cn

<sup>b</sup>State Key Laboratory of Applied Organic Chemistry, Lanzhou University, Lanzhou 730000, People's Republic of China E-mail: [liangym@lzu.edu.cn](mailto:liangym@lzu.edu.cn)

## Supporting Information

### Table of Contents

|                                                                                                         |    |
|---------------------------------------------------------------------------------------------------------|----|
| 1. General methods and materials .....                                                                  | 2  |
| 2. General Procedures .....                                                                             | 2  |
| 2.1 Synthesis of substrates 1 .....                                                                     | 2  |
| 2.2 Synthesis of substrates 4 .....                                                                     | 2  |
| 3. Efficient Construction of Fused Indolines 3a-9 via an Intramolecular Heck Cyclization. ....          | 3  |
| 3.1 Procedure for the dearomative arylvinylation of indoles with <i>N</i> -arylsulfonylhydrazones ..... | 3  |
| 3.2 Characterization data of 3a-9 .....                                                                 | 3  |
| 4. NMR Charts .....                                                                                     | 18 |
| 5. X-ray Single Crystal Diffraction Data of 3j and 9 .....                                              | 59 |

## 1. General methods and materials

All reactions involving air- and moisture-sensitive reagents were carried out under an argon atmosphere.  $^1\text{H}$  and  $^{13}\text{C}$  NMR spectra were recorded on a Bruker AC-P 400 spectrometer (400 MHz for  $^1\text{H}$ , 100 MHz for  $^{13}\text{C}$ ) in  $\text{CDCl}_3$  (with TMS as internal standard). Chemical shifts ( $\delta$ ) were measured in ppm. Coupling constants,  $J$ , are reported in hertz. Mass data were measured with Thermo Scientific DSQ II mass spectrometer and Bruker O-TOF Compact Mass Spectrometry. Melting points (uncorrected) were obtained on Shanghai Inesa WRS-3 melting point apparatus. The starting materials were purchased from Innochem or Energy Chemicals and used without further purification. Solvents were dried and purified according to the procedure from "Purification of Laboratory Chemicals book". The crude products were purified by flash column chromatography on silica gel and the reported yields are the actual isolated yields of pure products. Thin-layer chromatography (TLC) was performed using 60 mesh silica gel plates visualized with short-wavelength UV light (254 nm).

## 2. General Procedures

### 2.1 Synthesis of substrates 1

To a solution of indole derivative (1.0 equiv, 0.5 M) in THF was added 60% dispersion of NaH (1.2 equiv) in portions at 0 °C. After stirring at 0 °C for 30 min, a solution of acid chloride in THF was added dropwise to the reaction system. The mixture was then allowed to stir at room temperature. When the reaction was completed, the reaction mixture was quenched by aqueous  $\text{NH}_4\text{Cl}$  and extracted with EtOAc. The combined organic phase was dried over  $\text{Na}_2\text{SO}_4$  and concentrated under reduced pressure. The residue was purified by column chromatography using the indicated fluent to give the substrates.

### 2.2 Synthesis of substrates 4

A 60% dispersion of NaH in mineral oil (1.2 equiv) was added to a stirred solution of the appropriate indole derivative (1 equiv, ~0.5 M) in THF at 0 °C and the corresponding solution was stirred for 5 minutes before warming to room temperature where it was stirred for 30 minutes. The solution of the sodium indolate was re-cooled to 0 °C at which time a solution of appropriate 2-bromobenzoyl chloride derivative (2 equiv or 2.2 equiv, ~1 M) in THF was added dropwise. Once the addition was complete, the reaction was allowed to warm to room temperature and then was stirred at 65 °C for 30 minutes. At this time the extent of completion of the reaction was determined by conversion of the indole derivative by TLC analysis. The reaction was cooled to room temperature and quenched with a saturated solution of  $\text{NH}_4\text{Cl}$ . The reaction mixture was then diluted with water and EtOAc, and after separating the layers, the aqueous layer was extracted with EtOAc (3x). The combined organic layers were washed sequentially with water and brine, dried over sodium sulfate, filtered and concentrated under reduced pressure. The crude *N*-(2-bromobenzoyl) indole derivative was purified by flash column gel chromatography using the indicated solvent system.

### 3. Efficient Construction of Fused Indolines 3a-9 via an Intramolecular Heck Cyclization.

#### 3.1 Procedure for the dearomative arylvinylation of indoles with *N*-arylsulfonylhydrazones

##### 3.1.1 Synthesis of products 3

An oven-dried Schlenk tube charged with *N*-(2-Iodobenzoyl)indole derivative **1** (0.2 mmol), *N*-tosylhydrazone **2a** (2.0 equiv), Pd(CF<sub>3</sub>COO)<sub>2</sub> (10 mol%), PPh<sub>3</sub> (3.0 equiv), KHCO<sub>3</sub> (2.0 equiv), H<sub>2</sub>O (8.0 equiv) in PhCH<sub>3</sub> (4.0 mL) was conducted at 100 °C under Ar atmosphere for 12.0 h. The reaction was monitored by TLC. After reaction, the reaction mixture was cooled down to room temperature and evaporated under reduced pressure. The residue was further purified by chromatography on silica gel to afford the corresponding products.

##### 3.1.2 Synthesis of products 5 and 6

An oven-dried Schlenk tube charged with *N*-(2-bromobenzoyl)indole derivative **4** (0.2 mmol), *N*-tosylhydrazone **2** (2.0 equiv), Pd(CF<sub>3</sub>COO)<sub>2</sub> (10 mol%), PPh<sub>3</sub> (3.0 equiv), KHCO<sub>3</sub> (2.0 equiv), H<sub>2</sub>O (16.0 equiv) in 1,4-dioxane (4.0 mL) was conducted at 100 °C under Ar atmosphere for 12.0 h. The reaction was monitored by TLC. After reaction, the reaction mixture was cooled down to room temperature and evaporated under reduced pressure. The residue was further purified by chromatography on silica gel to afford the corresponding products.

#### 3.2 Characterization data of 3a-9

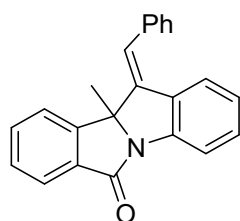

**(3a)**-Purified by chromatography on silica gel, eluting with ethyl acetate/petroleum ether 1:10 (v/v); yellow liquid; 47.2 mg, 73% yield. <sup>1</sup>H NMR (400 MHz, CDCl<sub>3</sub>) δ: 7.83 (d, *J* = 8.0 Hz, 1H), 7.68-7.58 (m, 3H), 7.45 (t, *J* = 8.0 Hz, 1H), 7.30-7.11 (m, 7H), 6.83-6.79 (t, *J* = 8.0 Hz, 2H), 1.78 (s, 3H); <sup>13</sup>C NMR (100 MHz, CDCl<sub>3</sub>) δ: 169.04, 150.28, 142.10, 141.10, 136.23, 133.37, 132.41, 131.46, 130.07, 128.85, 128.57, 128.39, 127.67, 125.28, 124.89, 124.18, 123.16, 122.09, 117.78, 74.39, 30.40; HRMS (ESI): *m/z* calcd for C<sub>23</sub>H<sub>17</sub>NNaO<sup>+</sup> [*M*+Na]<sup>+</sup> 346.1202. Found 346.1200.

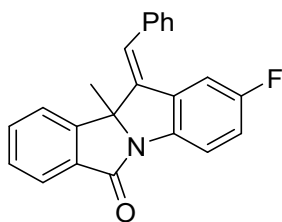

**(3b)**-Purified by chromatography on silica gel, eluting with ethyl acetate/petroleum ether 1:7 (v/v); white solid, m.p. = 222-224 °C; 34.1 mg, 50% yield. **<sup>1</sup>H NMR** (400 MHz, CDCl<sub>3</sub>) δ: 7.90 (d, *J* = 8.0 Hz, 1H), 7.72-7.66 (m, 3H), 7.55-7.51 (m, 1H), 7.41-7.32 (m, 5H), 7.01 (td, *J* = 8.7, 2.6 Hz, 1H), 6.93 (s, 1H), 6.85 (dd, *J* = 9.4, 2.5 Hz, 1H), 1.86 (s, 3H). **<sup>13</sup>C NMR** (100 MHz, CDCl<sub>3</sub>) δ: 169.18, 159.53 (d, *J* = 240 Hz), 150.12, 140.65, 138.30, 135.58, 133.50, 132.93 (d, *J* = 9 Hz), 132.19, 128.98, 128.76, 128.22, 128.06, 125.36, 124.59, 122.04, 118.51 (d, *J* = 8 Hz), 116.73 (d, *J* = 24 Hz), 111.79 (d, *J* = 26 Hz), 74.89, 30.31. **HRMS** (ESI): *m/z* calcd for C<sub>23</sub>H<sub>16</sub>FNNaO<sup>+</sup> [M+Na]<sup>+</sup> 364.1108. Found 364.1108.

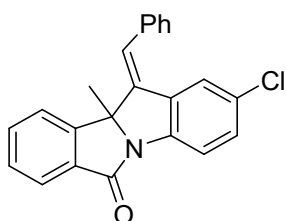

**(3c)**-Purified by chromatography on silica gel, eluting with ethyl acetate/petroleum ether 1:10 (v/v); white solid, m.p. = 188-190 °C; 40.8 mg, 57% yield. **<sup>1</sup>H NMR** (400 MHz, CDCl<sub>3</sub>) δ: 7.91 (d, *J* = 8.0 Hz, 1H), 7.72-7.66 (m, 3H), 7.56-7.52 (m, 1H), 7.38 (dt, *J* = 22.5, 7.5 Hz, 5H), 7.29-7.27 (m, 1H), 7.14 (d, *J* = 2.0 Hz, 1H), 6.94 (s, 1H), 1.85 (s, 3H). **<sup>13</sup>C NMR** (100 MHz, CDCl<sub>3</sub>) δ: 168.99, 150.09, 140.67, 140.18, 135.53, 133.61, 132.99, 132.09, 129.91, 129.56, 129.01, 128.76, 128.21, 128.14, 125.41, 124.79, 124.65, 122.07, 118.59, 74.68, 30.40. **HRMS** (ESI): *m/z* calcd for C<sub>23</sub>H<sub>16</sub>ClNNaO<sup>+</sup> [M+Na]<sup>+</sup> 380.0813. Found 380.0813.

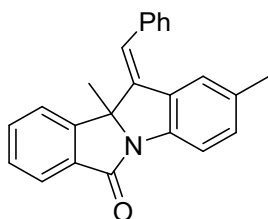

**(3d)**-Purified by chromatography on silica gel, eluting with ethyl acetate/petroleum ether 1:10 (v/v); white solid, m.p. = 168-170 °C; 50.6 mg, 75% yield. **<sup>1</sup>H NMR** (400 MHz, CDCl<sub>3</sub>) δ: 7.90 (d, *J* = 8.0 Hz, 1H), 7.72-7.62 (m, 3H), 7.54-7.50 (m, 1H), 7.38-7.30 (m, 5H), 7.14 (d, *J* = 8.0 Hz, 1H), 7.02 (s, 1H), 6.86 (s, 1H), 2.15 (s, 3H), 1.85 (s, 3H). **<sup>13</sup>C NMR** (100 MHz, CDCl<sub>3</sub>) δ: 169.00, 150.29, 141.24, 139.93, 136.30, 133.71, 133.24, 132.54, 131.51, 130.79, 128.79, 128.48, 128.43, 127.66, 125.37, 125.23, 122.93, 122.07, 117.46, 74.63, 30.32, 21.21. **HRMS** (ESI): *m/z* calcd for C<sub>24</sub>H<sub>19</sub>NNaO<sup>+</sup> [M+Na]<sup>+</sup> 360.1359. Found 360.1355.

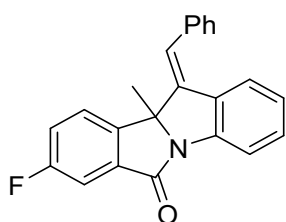

**(3e)**-Purified by chromatography on silica gel, eluting with ethyl acetate/petroleum ether 1:15 (v/v); white solid, m.p. = 238-240 °C; 50.5 mg, 74% yield. **<sup>1</sup>H NMR** (400 MHz, CDCl<sub>3</sub>) δ: 7.73 (d, *J* = 8.0 Hz, 1H), 7.68 (dd, *J* = 8.4, 4.4 Hz, 1H), 7.56 (dd, *J* = 7.5, 2.4 Hz, 1H), 7.40-7.30 (m, 7H), 7.19 (d, *J* = 8.0 Hz, 1H), 6.90 (t, *J* = 8.0 Hz, 1H), 6.84 (s, 1H), 1.85 (s, 3H). **<sup>13</sup>C NMR** (100 MHz, CDCl<sub>3</sub>) δ: 167.77, 163.23 (d, *J* = 268 Hz), 145.80, 141.76, 140.89, 136.05, 134.66 (d, *J* = 8 Hz), 131.43, 130.16, 128.63, 128.37, 127.80, 124.98, 124.45, 123.59 (d, *J* = 8 Hz), 123.34, 120.84 (d, *J* = 23 Hz), 117.82, 111.81 (d, *J* = 23 Hz), 74.18, 30.38. **HRMS** (ESI): *m/z* calcd for C<sub>23</sub>H<sub>16</sub>FNNaO<sup>+</sup> [M+Na]<sup>+</sup> 364.1108. Found 364.1108.

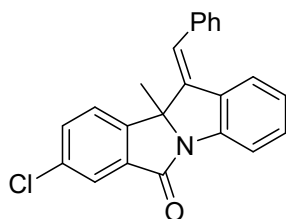

**(3f)**-Purified by chromatography on silica gel, eluting with ethyl acetate/petroleum ether 1:20 (v/v); white solid, m.p. = 236-238 °C; 53.7 mg, 75% yield. **<sup>1</sup>H NMR** (400 MHz, CDCl<sub>3</sub>) δ: 7.86 (s, 1H), 7.72 (d, *J* = 8.0 Hz, 1H), 7.66-7.62 (m, 2H), 7.40-7.29 (m, 6H), 7.18 (d, *J* = 8.0 Hz, 1H), 6.92-6.88 (m, 1H), 6.83 (s, 1H), 1.84 (s, 3H). **<sup>13</sup>C NMR** (100 MHz, CDCl<sub>3</sub>) δ: 167.55, 148.35, 141.72, 140.69, 135.97, 135.24, 134.27, 133.46, 131.36, 130.19, 128.63, 128.35, 127.82, 125.26, 124.98, 124.48, 123.38, 123.33, 117.83, 74.24, 30.27. **HRMS** (ESI): *m/z* calcd for C<sub>23</sub>H<sub>16</sub>ClNNaO<sup>+</sup> [M+Na]<sup>+</sup> 380.0813. Found 380.0814.

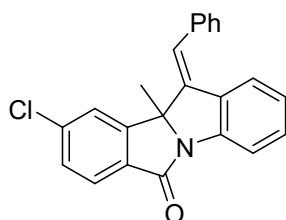

**(3g)**-Purified by chromatography on silica gel, eluting with ethyl acetate/petroleum ether 1:10 (v/v); white solid, m.p. = 206-208 °C; 64.4 mg, 90% yield. **<sup>1</sup>H NMR** (400 MHz, CDCl<sub>3</sub>) δ: 7.86 (d, *J* = 8.0 Hz, 1H), 7.77-7.73 (m, 2H), 7.55-7.52 (m, 1H), 7.42-7.39 (m, 3H), 7.38-7.30 (m, 3H), 7.23 (d, *J* = 8.0 Hz, 1H), 6.93 (t, *J* = 8.0 Hz, 1H), 6.88 (s, 1H), 1.89 (s, 3H). **<sup>13</sup>C NMR** (100 MHz, CDCl<sub>3</sub>) δ: 167.94, 151.77, 141.91, 140.57, 139.79, 135.97, 130.19, 129.50, 129.10, 128.75, 128.64, 128.39, 127.84, 126.49, 124.97, 124.41, 123.45, 122.67, 117.79, 74.07, 30.32. **HRMS** (ESI): *m/z* calcd for C<sub>23</sub>H<sub>16</sub>ClNNaO<sup>+</sup> [M+Na]<sup>+</sup> 380.0813. Found 380.0813.

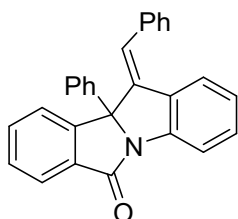

**(3h)**-Purified by chromatography on silica gel, eluting with ethyl acetate/petroleum ether 1:7 (v/v); white solid, m.p. = 160-162 °C; 53.9 mg, 70% yield. **<sup>1</sup>H NMR** (400 MHz, CDCl<sub>3</sub>) δ: 8.00 (d, *J* = 8.0 Hz, 1H), 7.77 (d, *J* = 8.0 Hz, 1H), 7.70-7.66 (m, 2H), 7.63 (d, *J* = 8.0 Hz, 1H), 7.60-7.53 (m, 2H), 7.49-7.42 (m, 4H), 7.40 – 7.22 (m, 6H), 7.14 (s, 1H), 6.90 (t, *J* = 8.0 Hz, 1H). **<sup>13</sup>C NMR** (100 MHz, CDCl<sub>3</sub>)

$\delta$ : 169.11, 149.59, 141.88, 141.48, 138.89, 135.87, 133.50, 132.50, 130.09, 129.20, 128.91, 128.60, 128.43, 128.04, 127.90, 126.70, 126.53, 125.97, 125.27, 124.76, 124.42, 123.58, 118.05, 79.41. **HRMS** (ESI):  $m/z$  calcd for  $C_{28}H_{19}NNaO^+$   $[M+Na]^+$  408.1359. Found 408.1359.

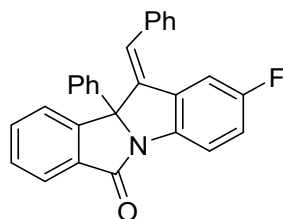

**(3i)**-Purified by chromatography on silica gel, eluting with ethyl acetate/petroleum ether 1:7 (v/v); white solid, m.p. = 190-192 °C; 43.5 mg, 54% yield.  **$^1H$  NMR** (400 MHz,  $CDCl_3$ )  $\delta$ : 8.00 (d,  $J$  = 8.0 Hz, 1H), 7.71-7.63 (m, 4H), 7.58-7.54 (m, 2H), 7.46-7.30 (m, 8H), 7.17 (s, 1H), 7.02 (t,  $J$  = 8.0 Hz, 1H), 6.90 (d,  $J$  = 8.0 Hz, 1H).  **$^{13}C$  NMR** (100 MHz,  $CDCl_3$ )  $\delta$ : 169.23, 159.68 (d,  $J$  = 241 Hz), 149.43, 141.17, 138.19 (d,  $J$  = 31 Hz), 135.23, 134.01 (d,  $J$  = 9 Hz), 133.62, 132.25, 129.05, 128.79, 128.68, 128.27, 128.20, 128.08, 125.93, 125.35, 123.54, 118.81 (d,  $J$  = 8 Hz), 116.72 (d,  $J$  = 24 Hz), 111.83 (d,  $J$  = 26 Hz), 79.91. **HRMS** (ESI):  $m/z$  calcd for  $C_{28}H_{18}FNNaO^+$   $[M+Na]^+$  426.1265. Found 426.1261.

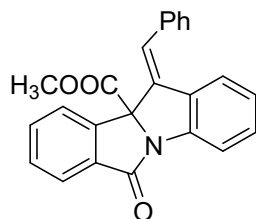

**(3j)**-Purified by chromatography on silica gel, eluting with ethyl acetate/petroleum ether 1:7 (v/v); white solid, m.p. = 90-92 °C; 53.6 mg, 73% yield.  **$^1H$  NMR** (400 MHz,  $CDCl_3$ )  $\delta$ : 8.02 (d,  $J$  = 8.0 Hz, 1H), 7.90 (d,  $J$  = 8.0 Hz, 1H), 7.79 (d,  $J$  = 8.0 Hz, 1H), 7.70 (t,  $J$  = 8.0 Hz, 1H), 7.57 (t,  $J$  = 8.0 Hz, 1H), 7.39-7.30 (m, 7H), 7.18 (d,  $J$  = 8.0 Hz, 1H), 6.88 (t,  $J$  = 8.0 Hz, 1H), 3.76 (s, 3H).  **$^{13}C$  NMR** (100 MHz,  $CDCl_3$ )  $\delta$ : 170.21, 168.79, 143.92, 143.17, 135.71, 135.42, 133.60, 132.80, 130.96, 130.23, 129.92, 128.61, 128.34, 128.04, 126.89, 125.12, 124.48, 124.39, 124.11, 117.34, 78.70, 53.67. **HRMS** (ESI):  $m/z$  calcd for  $C_{24}H_{17}NNaO_3^+$   $[M+Na]^+$  390.1101. Found 390.1101.

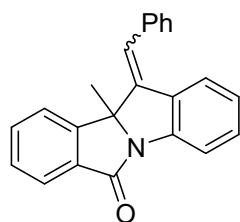

**(5a)**-Purified by chromatography on silica gel, eluting with ethyl acetate/petroleum ether 1:10 (v/v); yellow liquid; 58.1 mg, 90% yield ( $E/Z$ : 2:1).  **$^1H$  NMR** (400 MHz,  $CDCl_3$ )  $\delta$ : 7.90 (d,  $J$  = 8.0 Hz, 1H), 7.88-7.64 (m, 4H), 7.56-7.50 (m, 1.5H), 7.44-7.40 (m, 1.5H), 7.37-7.36 (m, 4.5H), 7.32-7.29 (m, 2H), 7.27-7.23 (m, 3H), 7.18 (d,  $J$  = 8.0 Hz, 1.5H), 6.90-6.86 (m, 2H), 1.85 (s, 3H), 1.84 (s, 1.5H).  **$^{13}C$  NMR** (100 MHz,  $CDCl_3$ )  $\delta$ : 169.05, 150.30, 142.12, 141.12, 136.24, 133.38, 132.41, 131.46, 130.06, 128.84, 128.57, 128.39, 127.67, 125.28, 124.90, 124.17, 123.17, 122.08, 117.79, 74.38, 30.41. **HRMS** (ESI):  $m/z$  calcd for  $C_{23}H_{17}NNaO^+$   $[M+Na]^+$  346.1202. Found 346.1205.

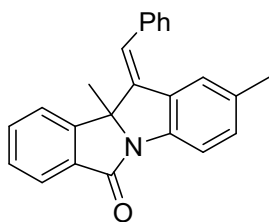

**(5b)**-Purified by chromatography on silica gel, eluting with ethyl acetate/petroleum ether 1:10 (v/v); white solid, m.p. = 168-170 °C; 38.4 mg, 57% yield. **<sup>1</sup>H NMR** (400 MHz, CDCl<sub>3</sub>) δ: 7.89 (d, *J* = 8 Hz, 1H), 7.66 (dt, *J* = 23.1, 7.8 Hz, 3H), 7.50 (t, *J* = 8.0 Hz, 1H), 7.37-7.30 (m, 5H), 7.12 (d, *J* = 8.0 Hz, 1H), 7.00 (s, 1H), 6.85 (s, 1H), 2.14 (s, 3H), 1.83 (s, 3H). **<sup>13</sup>C NMR** (100 MHz, CDCl<sub>3</sub>) δ: 168.99, 150.30, 141.25, 139.94, 136.31, 133.70, 133.23, 132.54, 131.51, 130.79, 128.78, 128.47, 128.42, 127.66, 125.37, 125.22, 122.93, 122.06, 117.46, 74.62, 30.32, 21.19. **HRMS** (ESI): *m/z* calcd for C<sub>24</sub>H<sub>19</sub>NNaO<sup>+</sup> [M+Na]<sup>+</sup> 360.1359. Found 360.1358.

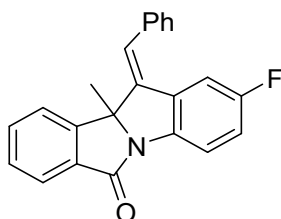

**(5c)**-Purified by chromatography on silica gel, eluting with ethyl acetate/petroleum ether 1:10 (v/v); white solid, m.p. = 222-224 °C; 32.7 mg, 48% yield. **<sup>1</sup>H NMR** (400 MHz, CDCl<sub>3</sub>) δ: 7.90 (d, *J* = 8.0 Hz, 1H), 7.71-7.65 (m, 3H), 7.53 (t, *J* = 8.0 Hz, 1H), 7.41-7.37 (m, 2H), 7.35-7.32 (m, 3H), 7.01 (td, *J* = 8.7, 2.5 Hz, 1H), 6.93 (s, 1H), 6.84 (dd, *J* = 9.4, 2.4 Hz, 1H), 1.85 (s, 3H). **<sup>13</sup>C NMR** (100 MHz, CDCl<sub>3</sub>) δ: 169.21, 159.54 (d, *J* = 240 Hz), 150.13, 140.64, 138.30, 135.58, 133.51, 132.94 (d, *J* = 9 Hz), 132.18, 128.99, 128.76, 128.22, 128.07, 125.38, 124.60, 122.04, 118.52 (d, *J* = 9 Hz), 116.73 (d, *J* = 24 Hz), 111.80 (d, *J* = 25 Hz), 74.90, 30.31. **HRMS** (ESI): *m/z* calcd for C<sub>23</sub>H<sub>16</sub>FNNaO<sup>+</sup> [M+Na]<sup>+</sup> 364.1108. Found 364.1108.

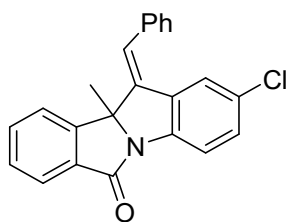

**(5d)**-Purified by chromatography on silica gel, eluting with ethyl acetate/petroleum ether 1:10 (v/v); white solid, m.p. = 193-195 °C; 47.3 mg, 66% yield. **<sup>1</sup>H NMR** (400 MHz, CDCl<sub>3</sub>) δ: 7.91 (d, *J* = 8.0 Hz, 1H), 7.73-7.66 (m, 3H), 7.56 – 7.52 (m, 1H), 7.43-7.34 (m, 5H), 7.30-7.27 (m, 1H), 7.15 (d, *J* = 2.0 Hz, 1H), 6.94 (s, 1H), 1.85 (s, 3H). **<sup>13</sup>C NMR** (100 MHz, CDCl<sub>3</sub>) δ: 168.98, 150.07, 140.65, 140.16, 135.51, 133.60, 132.98, 132.07, 129.89, 129.54, 129.00, 128.74, 128.19, 128.12, 125.39, 124.78, 124.65, 122.06, 118.58, 74.66, 30.38. **HRMS** (ESI): *m/z* calcd for C<sub>23</sub>H<sub>16</sub>ClNNaO<sup>+</sup> [M+Na]<sup>+</sup> 380.0813. Found 380.0811.

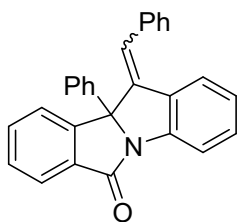

**(5e)**-Purified by chromatography on silica gel, eluting with ethyl acetate/petroleum ether 1:7 (v/v); white liquid; 53.9 mg, 70% yield (*E/Z*: 3:1). **<sup>1</sup>H NMR** (400 MHz, CDCl<sub>3</sub>) δ: 7.95 (d, *J* = 8.0 Hz, 0.3H), 7.84 (d, *J* = 8.0 Hz, 1H), 7.73-7.68 (m, 1.4H), 7.66-7.58 (m, 2H), 7.55-7.49 (m, 0.7H), 7.44-7.36 (m, 4.5H), 7.34-7.28 (m, 4.5H), 7.24-7.17 (m, 5.8H), 7.14-7.08 (m, 1.7H), 7.03 (d, *J* = 8.0 Hz, 2H), 6.07 (d, *J* = 8.0 Hz, 1H). **<sup>13</sup>C NMR** (100 MHz, CDCl<sub>3</sub>) δ: 169.11, 149.59, 141.88, 141.48, 138.89, 135.87, 133.50, 132.50, 130.09, 129.20, 128.91, 128.60, 128.43, 128.04, 127.90, 126.70, 126.53, 125.97, 125.27, 124.76, 124.42, 123.58, 118.05, 79.41. **HRMS** (ESI): *m/z* calcd for C<sub>28</sub>H<sub>19</sub>NNaO<sup>+</sup> [M+Na]<sup>+</sup> 408.1359. Found 408.1360.

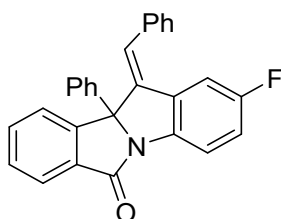

**(5f)**-Purified by chromatography on silica gel, eluting with ethyl acetate/petroleum ether 1:10 (v/v); white solid, m.p. = 182-184 °C; 55.6 mg, 69% yield. **<sup>1</sup>H NMR** (400 MHz, CDCl<sub>3</sub>) δ: 7.90 (d, *J* = 8.0 Hz, 1H), 7.61-7.54 (m, 4H), 7.48-7.45 (m, 2H), 7.35-7.20 (m, 8H), 7.07 (s, 1H), 6.92 (t, *J* = 8.0 Hz, 1H), 6.79 (d, *J* = 8.0 Hz, 1H). **<sup>13</sup>C NMR** (100 MHz, CDCl<sub>3</sub>) δ: 169.27, 159.71 (d, *J* = 241 Hz), 149.45, 141.18, 138.36, 138.02, 135.25, 134.03 (d, *J* = 9 Hz), 133.64, 132.27, 129.07, 128.81, 128.70, 128.29, 128.22, 128.09, 125.95, 125.38, 123.55, 118.84 (d, *J* = 9 Hz), 116.74 (d, *J* = 24 Hz), 111.98, 111.72, 79.94. **HRMS** (ESI): *m/z* calcd for C<sub>28</sub>H<sub>18</sub>FNNaO<sup>+</sup> [M+Na]<sup>+</sup> 426.1265. Found 426.1265.

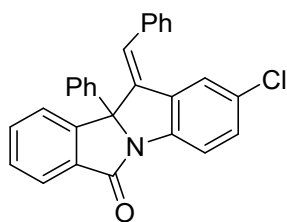

**(5g)**-Purified by chromatography on silica gel, eluting with ethyl acetate/petroleum ether 1:7 (v/v); white solid, m.p. = 153-155 °C; 39.5 mg, 47% yield. **<sup>1</sup>H NMR** (400 MHz, CDCl<sub>3</sub>) δ: 7.92 (d, *J* = 8.0 Hz, 1H), 7.61-7.55 (m, 4H), 7.51-7.47 (m, 2H), 7.38 (s, 4H), 7.31-7.24 (m, 3H), 7.22-7.20 (m, 2H), 7.09 (d, *J* = 4.0 Hz, 2H). **<sup>13</sup>C NMR** (100 MHz, CDCl<sub>3</sub>) δ: 169.06, 149.40, 141.12, 140.40, 137.93, 135.20, 134.05, 133.74, 132.21, 129.95, 129.89, 129.11, 128.81, 128.71, 128.38, 128.28, 128.25, 128.14, 125.94, 125.43, 124.76, 123.59, 118.90, 79.70. **HRMS** (ESI): *m/z* calcd for C<sub>28</sub>H<sub>18</sub>ClNNaO<sup>+</sup> [M+Na]<sup>+</sup> 442.0969. Found 442.0970.



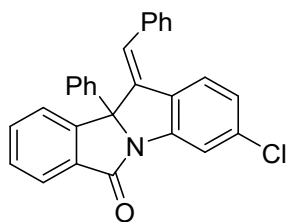

**(5h)**-Purified by chromatography on silica gel, eluting with ethyl acetate/petroleum ether 1:15 (v/v); white solid, m.p. = 176-178 °C; 24.4 mg, 29% yield. **<sup>1</sup>H NMR** (400 MHz, CDCl<sub>3</sub>) δ: 7.96 (d, *J* = 8.0 Hz, 1H), 7.70 (d, *J* = 4.0 Hz, 1H), 7.63-7.58 (m, 3H), 7.54-7.50 (m, 2H), 7.40-7.27 (m, 8H), 7.08-7.05 (m, 2H), 6.82 (dd, *J* = 8.3, 1.5 Hz, 1H). **<sup>13</sup>C NMR** (100 MHz, CDCl<sub>3</sub>) δ: 168.99, 149.50, 142.79, 141.16, 137.96, 135.66, 135.60, 133.80, 132.10, 131.06, 129.09, 128.73, 128.70, 128.35, 128.24, 128.12, 127.12, 125.92, 125.46, 125.37, 124.68, 123.60, 118.44, 79.74. **HRMS** (ESI): *m/z* calcd for C<sub>28</sub>H<sub>18</sub>ClNNaO<sup>+</sup> [M+Na]<sup>+</sup> 442.0968mn. Found 442.0965.

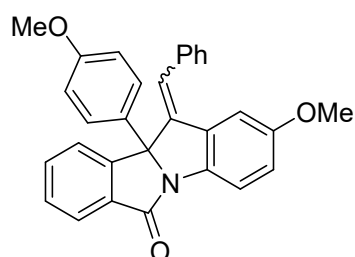

**(5i)**-Purified by chromatography on silica gel, eluting with ethyl acetate/petroleum ether 1:5 (v/v); yellow liquid; 79.2 mg, 89% yield (*E/Z*: 3:1). **<sup>1</sup>H NMR** (400 MHz, CDCl<sub>3</sub>) δ: 7.94 (d, *J* = 8.0 Hz, 1H), 7.81 (d, *J* = 8.0 Hz, 0.36H), 7.60-7.57 (m, 2.6H), 7.51-7.48 (m, 4H), 7.44-7.29 (m, 6.66H), 7.16-7.09 (m, 1.31H), 7.04 (d, *J* = 8.0 Hz, 1.31H), 6.84-6.77 (m, 4H), 6.69 (d, *J* = 4 Hz, 1H), 3.86 (s, 1H), 3.77 (s, 1H), 3.75 (s, 3H), 3.51 (s, 3H). **<sup>13</sup>C NMR** (100 MHz, CDCl<sub>3</sub>) δ: 169.23, 159.36, 156.63, 149.80, 139.28, 135.84, 135.63, 133.68, 133.33, 132.58, 129.24, 128.85, 128.57, 127.98, 127.40, 126.69, 125.17, 123.49, 118.65, 116.16, 113.91, 110.02, 105.66, 79.69, 55.33, 55.24. **HRMS** (ESI): *m/z* calcd for C<sub>30</sub>H<sub>23</sub>NNaO<sub>3</sub><sup>+</sup> [M+Na]<sup>+</sup> 468.1570. Found 468.1570.

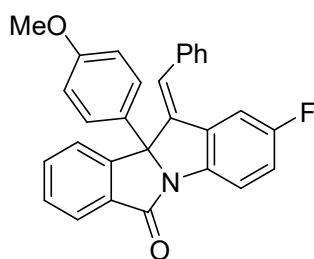

**(5j)**-Purified by chromatography on silica gel, eluting with ethyl acetate/petroleum ether 1:5 (v/v); yellow liquid; 44.2 mg, 51% yield. **<sup>1</sup>H NMR** (400 MHz, CDCl<sub>3</sub>) δ: 7.94 (d, *J* = 8.0 Hz, 1H), 7.64-7.59 (m, 2H), 7.53-7.47 (m, 4H), 7.43-7.35 (m, 5H), 7.07 (s, 1H), 6.96 (td, *J* = 8.7, 2.6 Hz, 1H), 6.86-6.83 (m, 3H), 3.75 (s, 3H). **<sup>13</sup>C NMR** (100 MHz, CDCl<sub>3</sub>) δ: 169.26, 159.69 (d, *J* = 241 Hz), 159.47, 149.78, 138.47, 137.98, 135.30, 134.09 (d, *J* = 10 Hz), 133.63, 133.18, 132.24, 129.00, 128.80, 128.28, 127.91, 127.39, 125.32, 123.53, 118.89 (d, *J* = 8 Hz), 116.72 (d, *J* = 24 Hz), 113.99, 111.93, 111.67, 79.71, 55.25. **HRMS** (ESI): *m/z* calcd for C<sub>29</sub>H<sub>20</sub>FNNaO<sub>2</sub><sup>+</sup> [M+Na]<sup>+</sup> 456.1370. Found 456.1370.

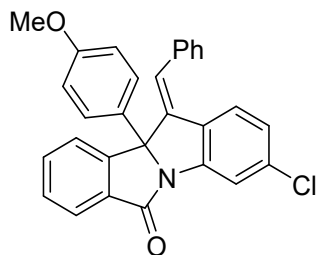

**(5k)**-Purified by chromatography on silica gel, eluting with ethyl acetate/petroleum ether 1:7 (v/v); yellow liquid; 64.8 mg, 72% yield. **<sup>1</sup>H NMR** (400 MHz, CDCl<sub>3</sub>) δ: 7.82 (d, *J* = 8.0 Hz, 1H), 7.61-7.59 (m, 2H), 7.41-7.24 (m, 6H), 7.16-7.09 (m, 3H), 7.04 (d, *J* = 8.0 Hz, 2H), 6.79 (d, *J* = 8.0 Hz, 2H), 6.07 (d, *J* = 8.0 Hz, 1H), 3.78 (s, 3H). **<sup>13</sup>C NMR** (100 MHz, CDCl<sub>3</sub>) δ: 168.87, 159.60, 147.64, 139.15, 138.63, 137.37, 136.23, 135.15, 133.05, 132.70, 130.54, 129.87, 129.17, 128.91, 128.48, 128.03, 127.87, 126.18, 124.55, 124.45, 120.47, 118.69, 113.94, 80.05, 55.25. **HRMS** (ESI): *m/z* calcd for C<sub>29</sub>H<sub>20</sub>ClNNaO<sub>2</sub><sup>+</sup> [M+Na]<sup>+</sup> 472.1075. Found 472.1076.

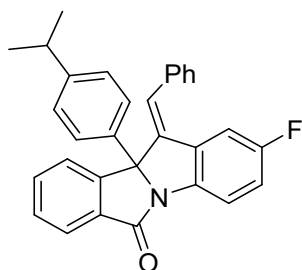

**(5l)**-Purified by chromatography on silica gel, eluting with ethyl acetate/petroleum ether 1:20 (v/v); yellow liquid; 49.8 mg, 56% yield. **<sup>1</sup>H NMR** (400 MHz, CDCl<sub>3</sub>) δ: 7.94 (d, *J* = 8.0 Hz, 1H), 7.65-7.58 (m, 2H), 7.54-7.48 (m, 4H), 7.40-7.32 (m, 5H), 7.17 (d, *J* = 8.0 Hz, 2H), 7.10 (s, 1H), 6.98-6.94 (m, 1H), 6.84-6.82 (m, 1H), 2.91-2.82 (m, 1H), 1.20-1.18 (d, 6H). **<sup>13</sup>C NMR** (100 MHz, CDCl<sub>3</sub>) δ: 169.29, 159.68 (d, *J* = 241 Hz), 149.66, 148.86, 138.52, 135.35, 133.58, 129.19 (d, *J* = 5 Hz), 128.97, 128.79, 128.54, 128.43, 128.29, 128.25, 127.87, 126.74, 126.46, 125.93, 125.30, 123.59, 118.81 (d, *J* = 9 Hz), 116.67 (d, *J* = 24 Hz), 111.82 (d, *J* = 25 Hz), 79.85, 33.61, 23.79. **HRMS** (ESI): *m/z* calcd for C<sub>31</sub>H<sub>24</sub>FNNaO<sup>+</sup> [M+Na]<sup>+</sup> 468.1734. Found 468.1731.

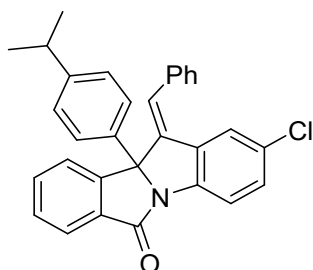

**(5m)**-Purified by chromatography on silica gel, eluting with ethyl acetate/petroleum ether 1:10 (v/v); yellow liquid; 45.3 mg, 49% yield. **<sup>1</sup>H NMR** (400 MHz, CDCl<sub>3</sub>) δ: 7.94 (d, *J* = 8.0 Hz, 1H), 7.67-7.59 (m, 3H), 7.55-7.47 (m, 4H), 7.40 (s, 3H), 7.24-7.16 (m, 4H), 7.11 (d, *J* = 8.0 Hz, 2H), 2.91-2.80 (m, 1H), 1.20 (s, 3H), 1.18 (s, 3H). **<sup>13</sup>C NMR** (100 MHz, CDCl<sub>3</sub>) δ: 169.08, 149.60, 148.90, 140.45, 138.45, 138.10, 135.30, 134.14, 133.68, 132.22, 129.89, 129.80, 129.01, 128.79, 128.32, 128.28, 127.91, 126.76, 125.92, 125.35, 124.73, 123.63, 118.88, 79.61, 33.62, 23.79. **HRMS** (ESI): *m/z* calcd for C<sub>31</sub>H<sub>24</sub>ClNNaO<sup>+</sup> [M+Na]<sup>+</sup> 484.1439. Found 484.1440.

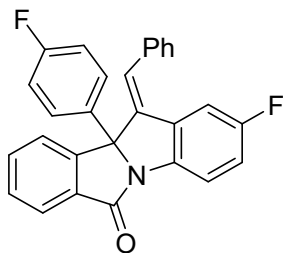

**(5n)**-Purified by chromatography on silica gel, eluting with ethyl acetate/petroleum ether 1:10 (v/v); yellow liquid; 27.8 mg, 33% yield.  $^1\text{H NMR}$  (400 MHz,  $\text{CDCl}_3$ )  $\delta$ : 7.95 (d,  $J = 8.0$  Hz, 1H), 7.65-7.60 (m, 2H), 7.57-7.54 (m, 2H), 7.51-7.48 (m, 1H), 7.42-7.36 (m, 5H), 7.09 (s, 1H), 7.03-6.96 (m, 4H), 6.87-6.84 (m, 1H).  $^{13}\text{C NMR}$  (100 MHz,  $\text{CDCl}_3$ )  $\delta$ : 169.21, 162.51 (d,  $J = 246$  Hz), 159.75 (d,  $J = 241$  Hz), 149.31, 138.26, 137.87, 136.99, 135.07, 133.77, 132.16, 129.23, 128.85, 128.54, 128.41, 128.25, 127.97, 127.88, 125.49, 123.48, 118.94 (d,  $J = 8$  Hz), 116.90 (d,  $J = 24$  Hz), 115.57 (d,  $J = 22$  Hz), 111.85 (d,  $J = 26$  Hz), 79.49. **HRMS** (ESI):  $m/z$  calcd for  $\text{C}_{28}\text{H}_{17}\text{F}_2\text{NNaO}^+$   $[\text{M}+\text{Na}]^+$  444.1170. Found 444.1170.

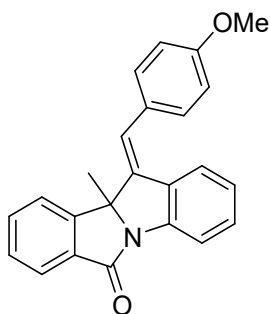

**(6a)**-Purified by chromatography on silica gel, eluting with ethyl acetate/petroleum ether 1:7 (v/v); yellow liquid; 45.9 mg, 65% yield.  $^1\text{H NMR}$  (400 MHz,  $\text{CDCl}_3$ )  $\delta$ : 7.89 (d,  $J = 8.0$  Hz, 1H), 7.74-7.64 (m, 3H), 7.51 (t,  $J = 8.0$  Hz, 1H), 7.32-7.26 (m, 4H), 6.92-6.88 (m, 3H), 6.82 (s, 1H), 3.84 (s, 3H), 1.83 (s, 3H).  $^{13}\text{C NMR}$  (100 MHz,  $\text{CDCl}_3$ )  $\delta$ : 169.06, 159.11, 150.43, 142.02, 140.24, 133.32, 132.45, 131.71, 129.84, 129.70, 128.79, 128.48, 125.25, 124.74, 124.15, 123.00, 122.11, 117.80, 113.94, 74.44, 55.26, 30.34. **HRMS** (ESI):  $m/z$  calcd for  $\text{C}_{24}\text{H}_{19}\text{NNaO}_2^+$   $[\text{M}+\text{Na}]^+$  376.1308. Found 376.1308.

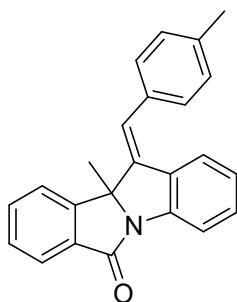

**(6b)**-Purified by chromatography on silica gel, eluting with ethyl acetate/petroleum ether 1:10 (v/v); white solid, m.p. = 192-194 °C; 43.8 mg, 65% yield.  $^1\text{H NMR}$  (400 MHz,  $\text{CDCl}_3$ )  $\delta$ : 7.90 (d,  $J = 8.0$  Hz, 1H), 7.75-7.65 (m, 3H), 7.52 (t,  $J = 8.0$  Hz, 1H), 7.33-7.27 (m, 4H), 7.18 (d,  $J = 8.0$  Hz, 2H), 6.90 (t,  $J = 8.0$  Hz, 1H), 6.86 (s, 1H), 2.39 (s, 3H), 1.85 (s, 3H).  $^{13}\text{C NMR}$  (100 MHz,  $\text{CDCl}_3$ )  $\delta$ : 169.07, 150.40, 142.06, 140.62, 137.49, 133.34, 133.22, 132.44, 131.64, 129.91, 129.24, 128.80, 128.29, 125.26, 124.89, 124.14, 123.30, 122.10, 117.76, 74.42, 30.41, 21.30. **HRMS** (ESI):  $m/z$  calcd for  $\text{C}_{24}\text{H}_{19}\text{NNaO}^+$   $[\text{M}+\text{Na}]^+$  360.1359. Found 360.1352.

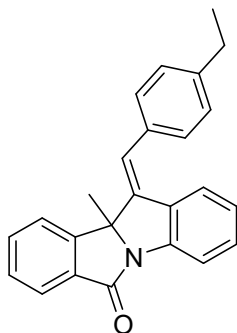

**(6c)**-Purified by chromatography on silica gel, eluting with ethyl acetate/petroleum ether 1:15 (v/v); white solid, m.p. = 167-169 °C; 35.8 mg, 51% yield.  $^1\text{H NMR}$  (400 MHz,  $\text{CDCl}_3$ )  $\delta$ : 7.89 (d,  $J$  = 8.0 Hz, 1H), 7.74-7.64 (m, 3H), 7.52-7.49 (m, 1H), 7.32-7.27 (m, 4H), 7.20 (d,  $J$  = 8.0 Hz, 2H), 6.89 (t,  $J$  = 8.0 Hz, 1H), 6.85 (s, 1H), 2.68 (q,  $J$  = 8.0 Hz, 2H), 1.84 (s, 3H), 1.27 (t,  $J$  = 8.0 Hz, 3H).  $^{13}\text{C NMR}$  (100 MHz,  $\text{CDCl}_3$ )  $\delta$ : 169.08, 150.42, 143.89, 142.08, 140.58, 133.45, 133.34, 132.45, 131.64, 129.92, 128.80, 128.36, 128.02, 125.27, 124.88, 124.15, 123.33, 122.10, 117.77, 74.44, 30.41, 28.65, 15.44. **HRMS** (ESI):  $m/z$  calcd for  $\text{C}_{25}\text{H}_{21}\text{NNaO}^+$   $[\text{M}+\text{Na}]^+$  374.1515. Found 374.1515.

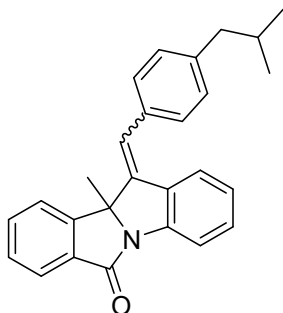

**(6d)**-Purified by chromatography on silica gel, eluting with ethyl acetate/petroleum ether 1:20 (v/v); yellow liquid; 33.4 mg, 44% yield ( $E/Z$ : 1.4:1).  $^1\text{H NMR}$  (400 MHz,  $\text{CDCl}_3$ )  $\delta$ : 7.89 (d,  $J$  = 8.0 Hz, 0.6H), 7.78-7.64 (m, 2.7H), 7.56-7.49 (m, 1H), 7.41-7.37 (m, 0.4H), 7.32-7.28 (m, 2.3H), 7.24-7.19 (m, 1.8H), 7.18-7.13 (m, 2.5H), 7.06-7.02 (m, 0.4H), 6.91-6.86 (m, 1.3H), 2.59 (d,  $J$  = 8.0 Hz, 0.8H), 2.50 (d,  $J$  = 8.0 Hz, 1.2H), 2.01-1.87 (m, 1H), 1.84 (d,  $J$  = 4.0 Hz, 3H), 1.02 (d,  $J$  = 8.0 Hz, 2.5H), 0.92 (d,  $J$  = 8.0 Hz, 3.5H).  $^{13}\text{C NMR}$  (100 MHz,  $\text{CDCl}_3$ )  $\delta$ : 169.08, 168.46, 150.41, 148.35, 142.07, 141.41, 141.38, 141.00, 140.59, 140.33, 134.33, 134.26, 133.50, 133.33, 132.44, 132.41, 132.10, 131.66, 129.91, 129.77, 129.28, 129.12, 128.80, 128.27, 128.15, 125.26, 124.87, 124.71, 124.61, 124.18, 124.14, 123.38, 122.10, 121.49, 120.90, 117.77, 117.46, 75.05, 74.44, 45.21, 45.18, 31.08, 30.38, 30.18, 22.33, 22.27. **HRMS** (ESI):  $m/z$  calcd for  $\text{C}_{27}\text{H}_{25}\text{NNaO}^+$   $[\text{M}+\text{Na}]^+$  402.1828. Found 402.1828.

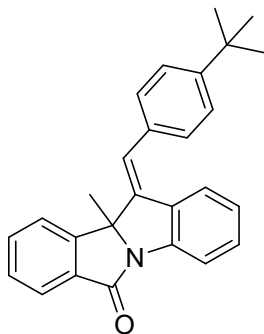

**(6e)**-Purified by chromatography on silica gel, eluting with ethyl acetate/petroleum ether 1:20 (v/v);

white solid, m.p. = 188-190 °C; 43.9 mg, 58% yield. **<sup>1</sup>H NMR** (400 MHz, CDCl<sub>3</sub>) δ: 7.89 (d, *J* = 8.0 Hz, 1H), 7.75-7.63 (m, 3H), 7.52-7.48 (m, 1H), 7.38 (d, *J* = 8.0 Hz, 2H), 7.34-7.29 (m, 4H), 6.91 (td, *J* = 8.0 Hz, 1.0 Hz, 1H), 6.84 (s, 1H), 1.84 (s, 3H), 1.34 (s, 9H). **<sup>13</sup>C NMR** (100 MHz, CDCl<sub>3</sub>) δ: 169.08, 150.86, 150.42, 142.08, 140.51, 133.32, 133.16, 132.44, 131.63, 129.93, 128.79, 128.10, 125.41, 125.25, 124.87, 124.15, 123.25, 122.08, 117.76, 74.47, 34.65, 31.30, 30.39. **HRMS** (ESI): *m/z* calcd for C<sub>27</sub>H<sub>25</sub>NNaO<sup>+</sup> [M+Na]<sup>+</sup> 402.1828. Found 402.1831.

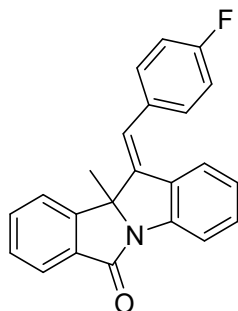

**(6f)**-Purified by chromatography on silica gel, eluting with ethyl acetate/petroleum ether 1:10 (v/v); white solid, m.p. = 258-260 °C; 43.6 mg, 64% yield. **<sup>1</sup>H NMR** (400 MHz, CDCl<sub>3</sub>) δ: 7.90 (d, *J* = 8.0 Hz, 1H), 7.74 (d, *J* = 8.0 Hz, 1H), 7.71-7.65 (m, 2H), 7.52 (t, *J* = 8.0 Hz, 1H), 7.34-7.31 (m, 3H), 7.13 (d, *J* = 8.0 Hz, 1H), 7.06 (t, *J* = 8.0 Hz, 2H), 6.90 (t, *J* = 8.0 Hz, 1H), 6.82 (s, 1H), 1.84 (s, 3H). **<sup>13</sup>C NMR** (100 MHz, CDCl<sub>3</sub>) δ: 169.00, 162.21 (d, *J* = 246 Hz), 150.22, 142.22, 141.61, 133.43, 132.45, 132.21, 131.29, 130.24, 130.16, 128.92, 125.37, 124.78, 124.24, 122.07, 121.98, 117.95, 115.63 (d, *J* = 22 Hz), 74.38, 30.35. **HRMS** (ESI): *m/z* calcd for C<sub>23</sub>H<sub>16</sub>FNNaO<sup>+</sup> [M+Na]<sup>+</sup> 364.1108. Found 364.1108.

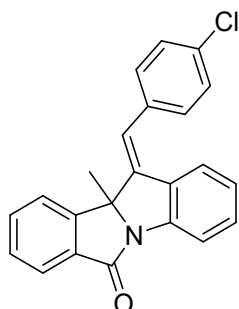

**(6g)**-Purified by chromatography on silica gel, eluting with ethyl acetate/petroleum ether 1:10 (v/v); white solid, m.p. = 224-226 °C; 45.8 mg, 64% yield. **<sup>1</sup>H NMR** (400 MHz, CDCl<sub>3</sub>) δ: 7.91 (d, *J* = 8.0 Hz, 1H), 7.77 (d, *J* = 8.0 Hz, 1H), 7.74-7.66 (m, 2H), 7.55-7.51 (m, 1H), 7.36-7.29 (m, 5H), 7.17 (d, *J* = 8.0 Hz, 1H), 6.91 (t, *J* = 8.0 Hz, 1H), 6.80 (s, 1H), 1.85 (s, 3H). **<sup>13</sup>C NMR** (100 MHz, CDCl<sub>3</sub>) δ: 168.95, 150.10, 142.26, 141.94, 134.70, 133.45, 132.41, 131.14, 130.88, 130.37, 129.86, 128.95, 128.83, 125.37, 124.84, 124.27, 122.06, 121.71, 117.96, 74.41, 30.32. **HRMS** (ESI): *m/z* calcd for C<sub>23</sub>H<sub>16</sub>ClNNaO<sup>+</sup> [M+Na]<sup>+</sup> 380.0813. Found 380.0811.

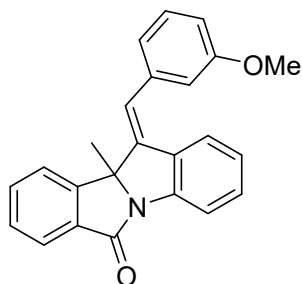

**(6h)**-Purified by chromatography on silica gel, eluting with ethyl acetate/petroleum ether 1:7 (v/v);

white solid, m.p. = 120-122 °C; 49.4 mg, 70% yield. **<sup>1</sup>H NMR** (400 MHz, CDCl<sub>3</sub>) δ: 7.90 (d, *J* = 8.0 Hz, 1H), 7.75-7.65 (m, 3H), 7.56-7.50 (m, 1H), 7.35-7.28 (m, 2H), 7.23-7.18 (m, 1H), 6.95-6.85 (m, 5H), 3.77 (s, 3H), 1.85 (s, 3H). **<sup>13</sup>C NMR** (100 MHz, CDCl<sub>3</sub>) δ: 169.05, 159.73, 150.29, 142.15, 141.26, 137.57, 133.39, 131.42, 130.11, 129.66, 128.86, 125.29, 125.13, 124.73, 124.19, 123.01, 122.10, 120.77, 117.80, 113.79, 113.30, 74.40, 55.25, 30.37. **HRMS** (ESI): *m/z* calcd for C<sub>24</sub>H<sub>19</sub>NNaO<sub>2</sub><sup>+</sup> [M+Na]<sup>+</sup> 376.1308. Found 376.1308.

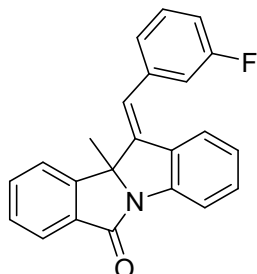

**(6i)**-Purified by chromatography on silica gel, eluting with ethyl acetate/petroleum ether 1:10 (v/v); white solid, m.p. = 227-229 °C; 30.7 mg, 45% yield. **<sup>1</sup>H NMR** (400 MHz, CDCl<sub>3</sub>) δ: 7.90 (d, *J* = 8.0 Hz, 1H), 7.75 (d, *J* = 8.0 Hz, 1H), 7.71-7.65 (m, 2H), 7.54-7.50 (m, 1H), 7.36-7.31 (m, 2H), 7.18-7.13 (m, 2H), 7.08-6.99 (m, 2H), 6.91 (td, *J* = 8.0 Hz, 1.0 Hz, 1H), 6.81 (s, 1H), 1.85 (s, 3H). **<sup>13</sup>C NMR** (100 MHz, CDCl<sub>3</sub>) δ: 168.96, 162.90 (d, *J* = 246 Hz), 150.07, 142.29, 142.19, 138.47 (d, *J* = 8 Hz), 133.46, 132.40, 131.00, 130.43, 130.16 (d, *J* = 8 Hz), 128.96, 125.37, 124.94, 124.30, 124.21 (d, *J* = 3 Hz), 122.04, 121.63 (d, *J* = 2 Hz), 117.93, 115.36 (d, *J* = 22 Hz), 114.55 (d, *J* = 21 Hz), 74.37, 30.36. **HRMS** (ESI): *m/z* calcd for C<sub>23</sub>H<sub>16</sub>FNNaO<sup>+</sup> [M+Na]<sup>+</sup> 364.1108. Found 364.1111.

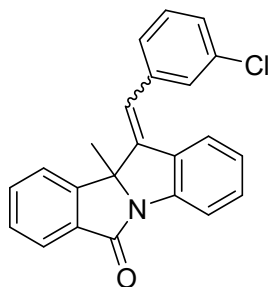

**(6j)**-Purified by chromatography on silica gel, eluting with ethyl acetate/petroleum ether 1:10 (v/v); yellow liquid; 40.1 mg, 56% yield (*E/Z*: 1.2:1). **<sup>1</sup>H NMR** (400 MHz, CDCl<sub>3</sub>) δ: 7.90 (d, *J* = 8.0 Hz, 1H), 7.79-7.74 (m, 2H), 7.70-7.65 (m, 1.8H), 7.55-7.50 (m, 1.8H), 7.44-7.29 (m, 5.5H), 7.21-7.14 (m, 5.5H), 6.92 (t, *J* = 8.0 Hz, 1H), 6.79 (s, 1H), 1.84 (s, 3H), 1.61 (s, 2.5H). **<sup>13</sup>C NMR** (100 MHz, CDCl<sub>3</sub>) δ: 168.96, 150.02, 147.85, 142.33, 140.52, 138.08, 134.48, 133.47, 132.31, 130.47, 129.87, 129.65, 128.52, 127.75, 126.60, 125.37, 124.37, 122.03, 121.42, 119.60, 117.94, 74.35, 30.35. **HRMS** (ESI): *m/z* calcd for C<sub>23</sub>H<sub>16</sub>ClNNaO<sup>+</sup> [M+Na]<sup>+</sup> 380.0813. Found 380.0812.

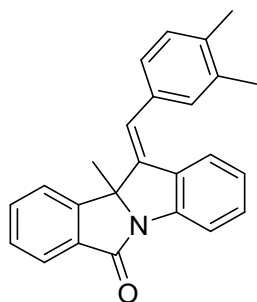

**(6l)**-Purified by chromatography on silica gel, eluting with ethyl acetate/petroleum ether 1:15 (v/v);

white solid, m.p. = 202-204 °C; 40.7 mg, 58% yield. **<sup>1</sup>H NMR** (400 MHz, CDCl<sub>3</sub>) δ: 7.89 (d, *J* = 8.0 Hz, 1H), 7.74-7.64 (m, 3H), 7.51 (t, *J* = 8.0 Hz, 1H), 7.32-7.27 (m, 2H), 7.13-7.09 (m, 3H), 6.89 (t, *J* = 8.0 Hz, 1H), 6.83 (s, 1H), 2.29 (s, 3H), 2.25 (s, 3H), 1.84 (s, 3H). **<sup>13</sup>C NMR** (100 MHz, CDCl<sub>3</sub>) δ: 169.12, 150.46, 142.04, 140.40, 136.74, 136.12, 133.64, 133.33, 132.44, 131.73, 129.84, 129.77, 129.54, 128.78, 125.74, 125.26, 124.91, 124.13, 123.47, 122.10, 117.74, 74.42, 30.42, 19.65, 19.59. **HRMS** (ESI): *m/z* calcd for C<sub>25</sub>H<sub>21</sub>NNaO<sup>+</sup> [M+Na]<sup>+</sup> 374.1515. Found 374.1517.

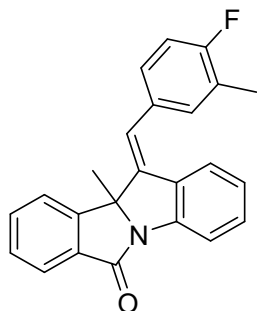

**(6m)**-Purified by chromatography on silica gel, eluting with ethyl acetate/petroleum ether 1:10 (v/v); white solid, m.p. = 181-183°C; 36.2 mg, 51% yield. **<sup>1</sup>H NMR** (400 MHz, CDCl<sub>3</sub>) δ: 7.90 (d, *J* = 8.0 Hz, 1H), 7.74 (d, *J* = 8.0 Hz, 1H), 7.70-7.65 (m, 2H), 7.53-7.50 (m, 1H), 7.32 (t, *J* = 8.0 Hz, 1H), 7.18-7.13 (m, 3H), 7.02-6.97 (m, 1H), 6.90 (t, *J* = 8.0 Hz, 1H), 6.80 (s, 1H), 2.26 (s, 3H), 1.84 (s, 3H). **<sup>13</sup>C NMR** (100 MHz, CDCl<sub>3</sub>) δ: 169.03, 160.71 (d, *J* = 245 Hz), 150.23, 142.11, 141.19, 133.39, 132.39, 131.85, 131.81, 131.55, 131.50, 131.41, 130.09, 128.87, 127.36 (d, *J* = 8 Hz), 125.31, 124.79, 124.20, 122.17 (d, *J* = 24 Hz), 117.87, 115.18 (d, *J* = 23 Hz), 74.34, 30.34, 14.46. **HRMS** (ESI): *m/z* calcd for C<sub>24</sub>H<sub>18</sub>FNNaO<sup>+</sup> [M+Na]<sup>+</sup> 378.1265. Found 378.1263.

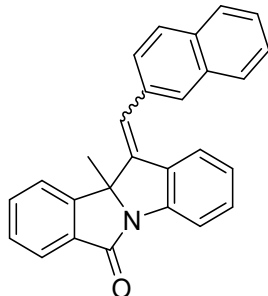

**(6n)**-Purified by chromatography on silica gel, eluting with ethyl acetate/petroleum ether 1:10 (v/v); yellow liquid; 60.4 mg, 81% yield (*E/Z*: 2:1). **<sup>1</sup>H NMR** (400 MHz, CDCl<sub>3</sub>) δ: 7.94-7.88 (m, 1.2H), 7.84-7.65 (m, 6.2H), 7.60-7.39 (m, 4H), 7.35-7.28 (m, 1.3H), 7.24-7.18 (m, 1.5H), 7.02 (s, 0.7H), 6.85-6.78 (m, 1H), 1.89(s, 2H), 1.87(s, 1.87). **<sup>13</sup>C NMR** (100 MHz, CDCl<sub>3</sub>) δ: 169.04, 168.54, 150.30, 148.20, 142.22, 141.45, 140.46, 134.29, 134.22, 133.69, 133.41, 133.35, 133.06, 132.73, 132.57, 132.43, 132.26, 132.14, 131.47, 130.15, 129.92, 128.87, 128.28, 128.22, 128.14, 128.10, 127.93, 127.90, 127.82, 127.72, 127.34, 127.32, 126.57, 126.52, 126.35, 126.30, 126.17, 125.30, 124.91, 124.77, 124.71, 124.22, 124.15, 123.09, 122.11, 121.32, 120.95, 117.83, 117.57, 75.04, 74.51, 30.81, 30.39. **HRMS** (ESI): *m/z* calcd for C<sub>27</sub>H<sub>19</sub>NNaO<sup>+</sup> [M+Na]<sup>+</sup> 396.1359. Found 396.1359.

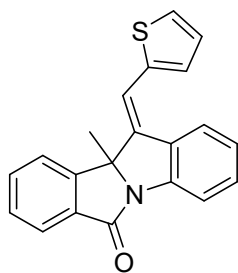

**(6)**-Purified by chromatography on silica gel, eluting with ethyl acetate/petroleum ether 1:10 (v/v); white solid, m.p. = 172-174 °C; 32.9 mg, 50% yield. **<sup>1</sup>H NMR** (400 MHz, CDCl<sub>3</sub>) δ: 7.89 (d, *J* = 8.0 Hz, 1H), 7.75 (d, *J* = 8.0 Hz, 1H), 7.71-7.65 (m, 2H), 7.58 (d, *J* = 8.0 Hz, 1H), 7.54-7.50 (m, 1H), 7.37-7.33 (m, 2H), 7.12 (d, *J* = 4.0 Hz, 1H), 7.06-7.03 (m, 1H), 7.01-6.97 (m, 1H), 6.80 (s, 1H), 1.84 (s, 3H). **<sup>13</sup>C NMR** (100 MHz, CDCl<sub>3</sub>) δ: 168.93, 149.97, 142.61, 142.26, 138.01, 133.46, 132.41, 131.14, 130.46, 128.94, 127.34, 127.08, 126.01, 125.36, 125.00, 124.35, 122.11, 117.84, 115.23, 74.61, 30.18. **HRMS** (ESI): *m/z* calcd for C<sub>21</sub>H<sub>15</sub>NNaOS<sup>+</sup> [M+Na]<sup>+</sup> 352.0767. Found 352.0762.

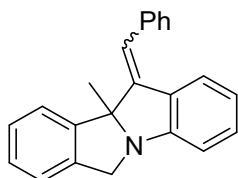

**(7)**-Purified by chromatography on silica gel, eluting with ethyl acetate/petroleum ether 1:4 (v/v); yellow liquid; 47.0 mg, 76% yield (*E/Z*: 2:1). **<sup>1</sup>H NMR** (400 MHz, CDCl<sub>3</sub>) δ: 7.62-7.59 (m, 0.7H), 7.54 (d, *J* = 8.0 Hz, 0.3H), 7.45-7.43 (m, 0.8H), 7.34-7.29 (m, 5.6H), 7.24-7.14 (m, 1.8H), 7.09 (d, *J* = 4.0 Hz, 0.3H), 7.00-6.88 (m, 1.6H), 6.81-6.75 (m, 1H), 6.70-6.67 (m, 0.7H), 6.62 (d, *J* = 8.0 Hz, 0.5H), 5.82 (s, 0.7H), 4.71-4.63 (m, 1H), 4.24-4.19 (m, 1H), 1.83 (s, 2H), 1.81 (s, 1H). **<sup>13</sup>C NMR** (100 MHz, CDCl<sub>3</sub>) δ: 150.29, 148.25, 143.27, 141.38, 137.26, 132.06, 131.65, 130.45, 128.35, 128.16, 127.20, 127.09, 127.00, 125.14, 124.66, 120.66, 120.23, 112.65, 70.13, 63.94, 29.91. **HRMS** (ESI): *m/z* calcd for C<sub>23</sub>H<sub>19</sub>NNa<sup>+</sup> [M+Na]<sup>+</sup> 332.1410. Found 332.1410.

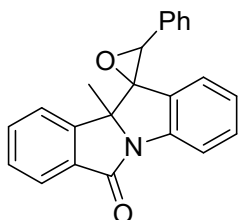

**(8)**-Purified by chromatography on silica gel, eluting with ethyl acetate/petroleum ether; white solid; 49.5 mg, 73% yield. **<sup>1</sup>H NMR** (400 MHz, CDCl<sub>3</sub>) δ: 7.81-7.76 (m, 2H), 7.57 (d, *J* = 8.0 Hz, 2H), 7.46-7.39 (m, 4H), 7.37-7.32 (m, 2H), 7.13-7.09 (m, 2H), 6.97 (s, 1H), 6.15 (s, 1H), 1.90 (s, 3H). **<sup>13</sup>C NMR** (100 MHz, CDCl<sub>3</sub>) δ: 169.61, 134.70, 133.78, 133.72, 132.52, 131.01, 130.24, 129.83, 129.52, 129.31, 128.75, 128.63, 128.29, 124.91, 124.55, 123.92, 118.12, 99.34, 74.91, 56.80, 23.91. **HRMS** (ESI): *m/z* calcd for C<sub>23</sub>H<sub>17</sub>NNaO<sub>2</sub><sup>+</sup> [M+Na]<sup>+</sup> 362.1151. Found 362.1151.



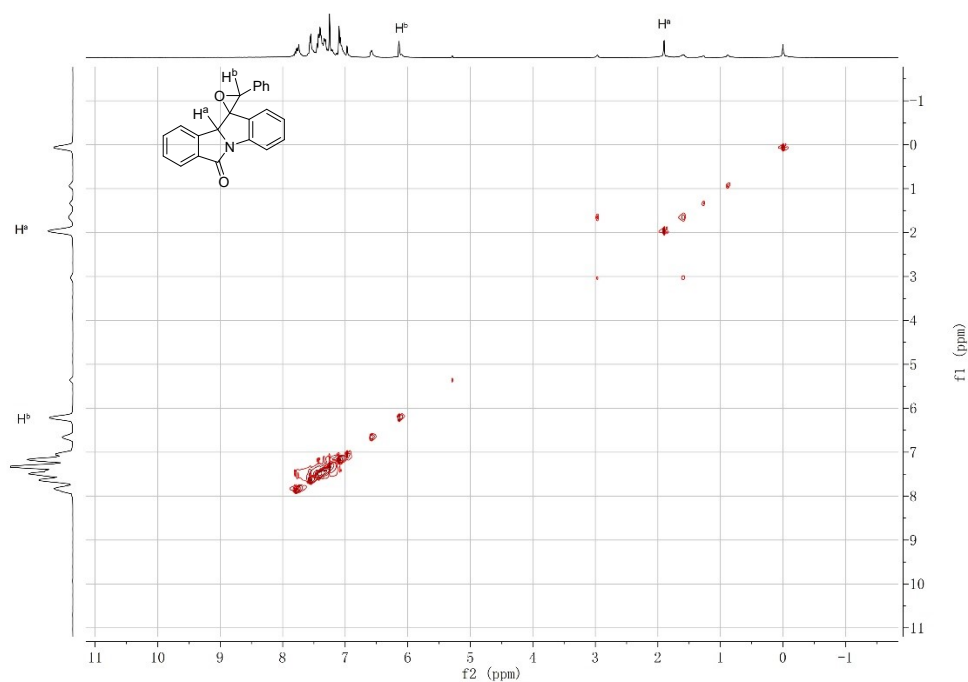

NOE spectrum of **8**

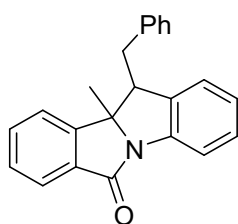

**(9)**-Purified by chromatography on silica gel, eluting with ethyl acetate/petroleum ether; white solid, m.p. = 175-177 °C; 63.1 mg, 97% yield.  $^1\text{H NMR}$  (400 MHz,  $\text{CDCl}_3$ )  $\delta$ : 7.79 (d,  $J = 8.0$  Hz, 1H), 7.65 (d,  $J = 8.0$  Hz, 1H), 7.40-7.29 (m, 7H), 7.24-7.15 (m, 2H), 7.09 (td,  $J = 8.0, 1.0$  Hz, 1H), 5.95 (d,  $J = 8.0$  Hz, 1H), 3.74 (dd,  $J = 10.0, 6.0$  Hz, 1H), 3.53 (dd,  $J = 14.0, 6.0$  Hz, 1H), 3.09 (dd,  $J = 14.0, 10.0$  Hz, 1H), 1.58 (s, 3H).  $^{13}\text{C NMR}$  (100 MHz,  $\text{CDCl}_3$ )  $\delta$ : 166.96, 150.38, 139.56, 139.16, 138.69, 132.72, 132.19, 129.22, 128.89, 128.29, 128.18, 126.85, 124.53, 124.42, 123.90, 122.59, 117.20, 75.60, 50.59, 33.55, 21.45. **HRMS** (ESI):  $m/z$  calcd for  $\text{C}_{23}\text{H}_{19}\text{NNaO}^+$  [ $\text{M}+\text{Na}$ ] $^+$  348.1359. Found 348.1360.

## 4. NMR Charts

**3a**- $^1\text{H}$

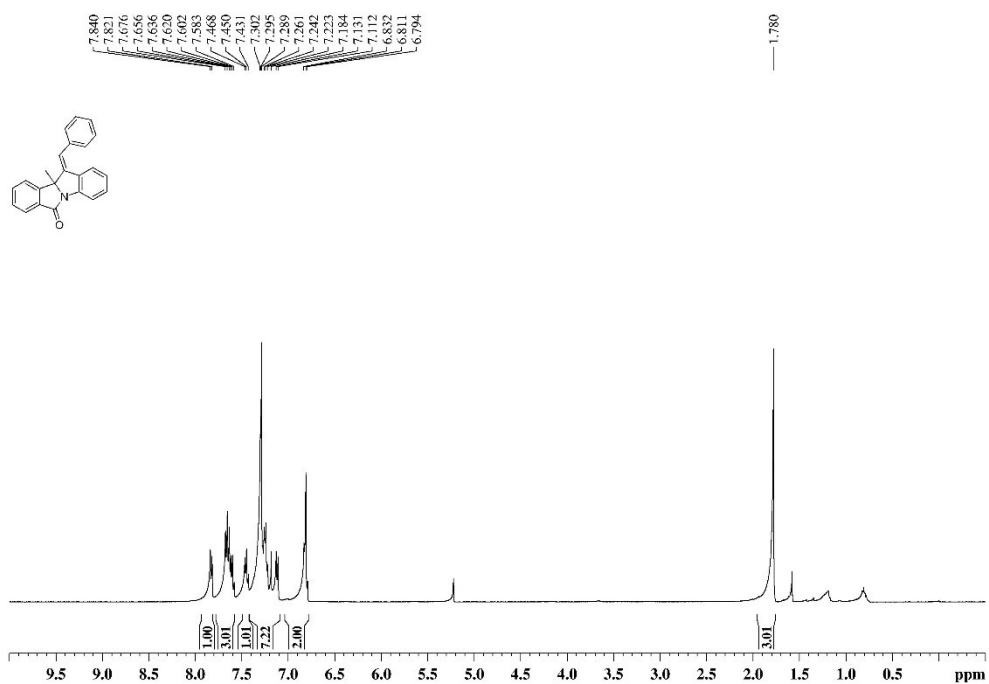

**3a-<sup>13</sup>C**

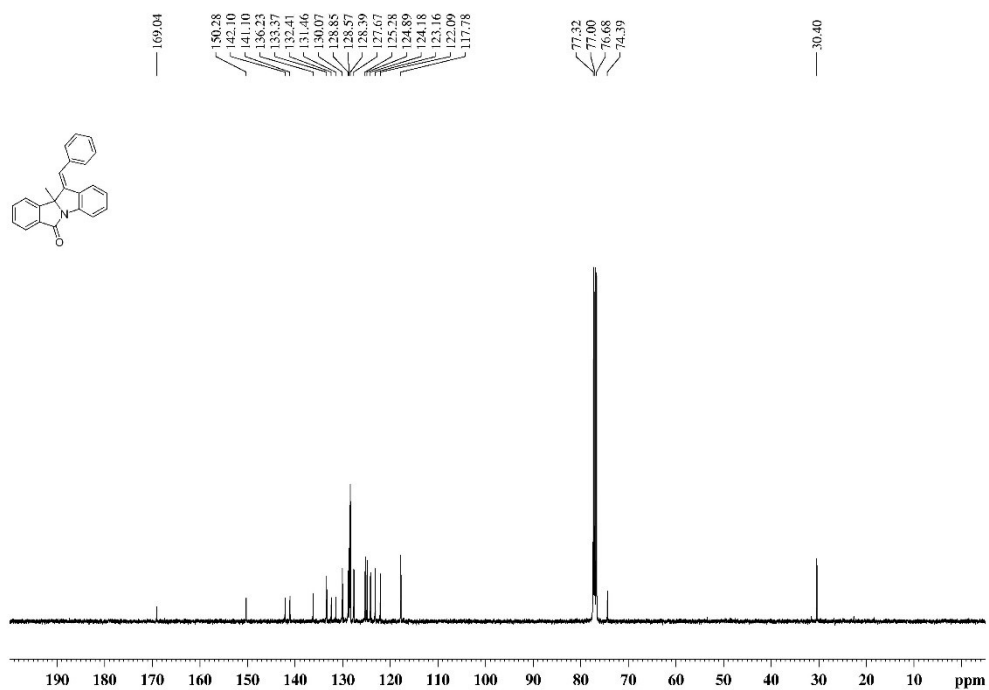

**3b-<sup>1</sup>H**

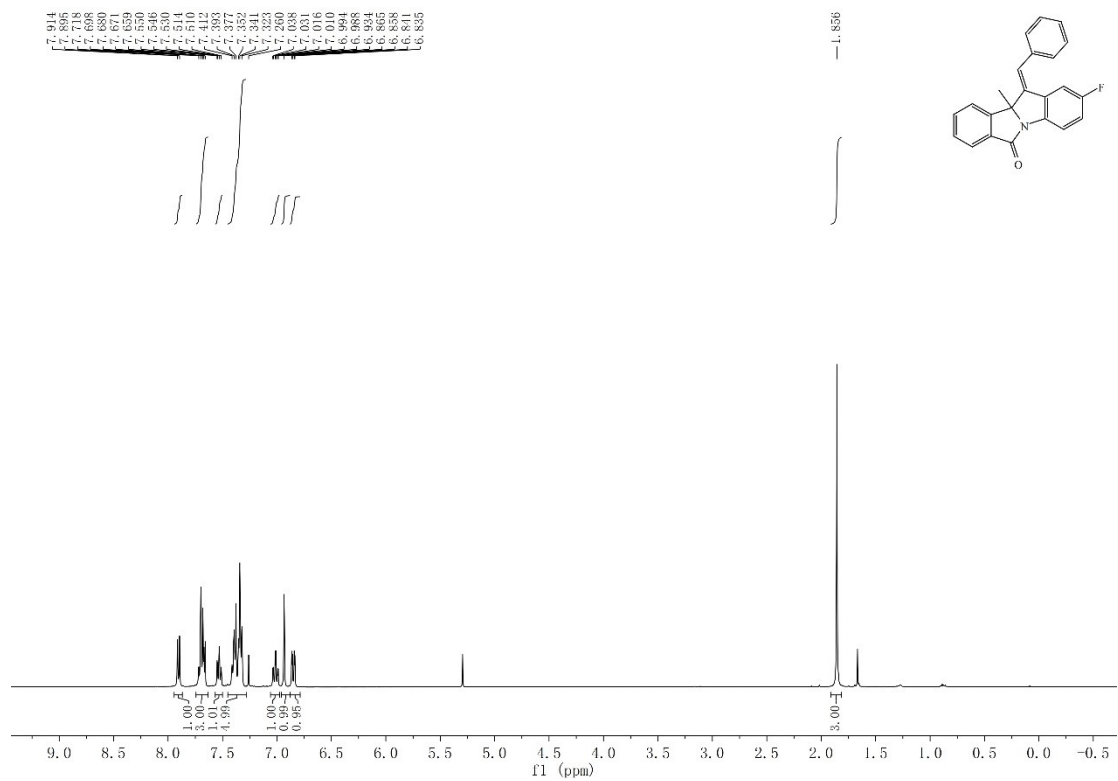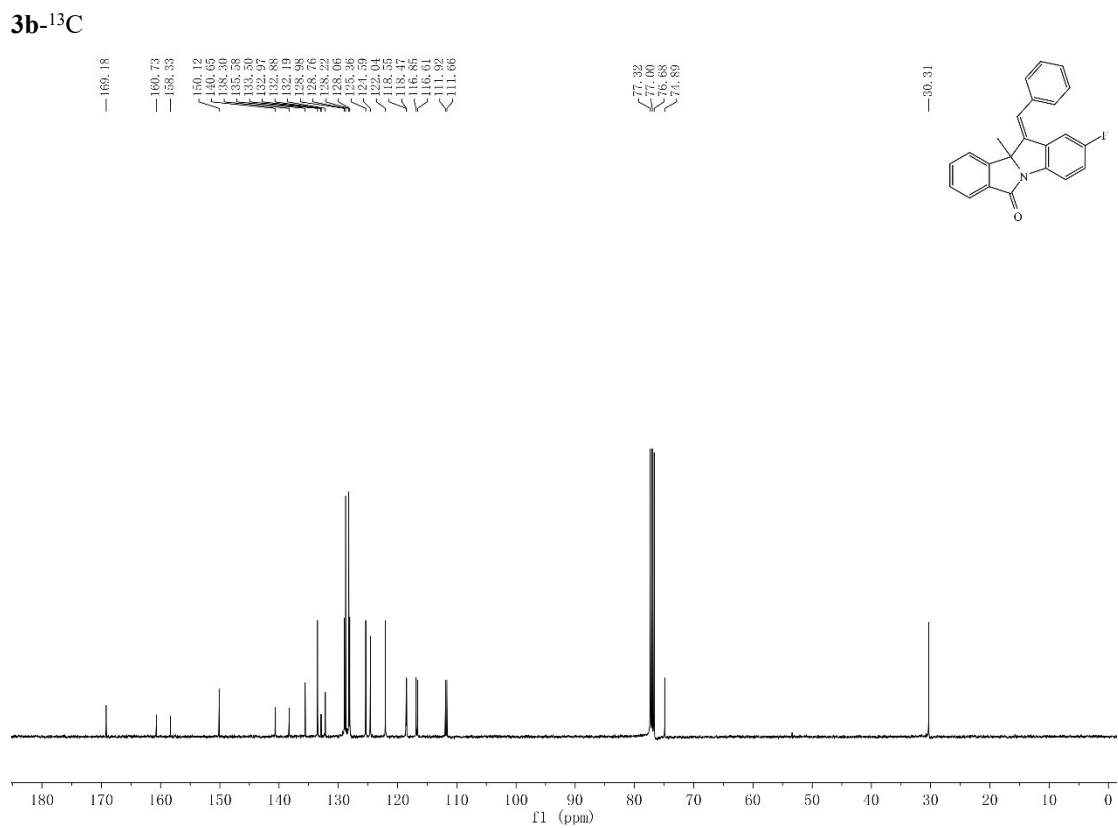

**3c-<sup>1</sup>H**

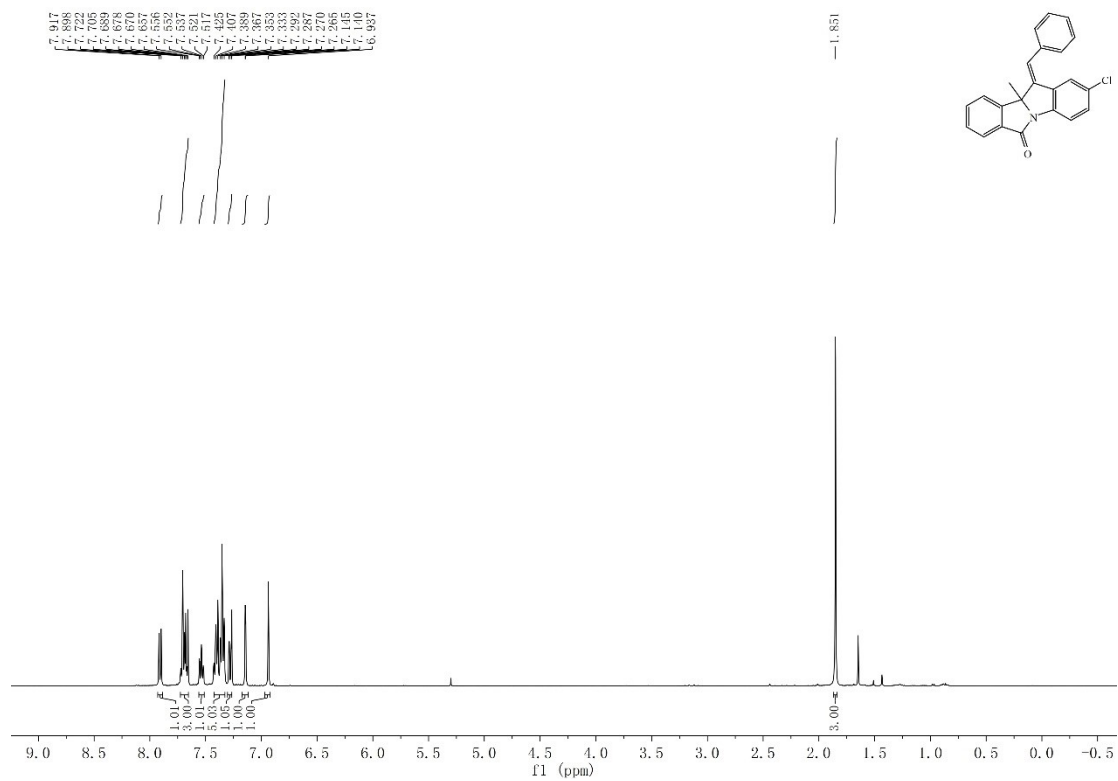

**3c-<sup>13</sup>C**

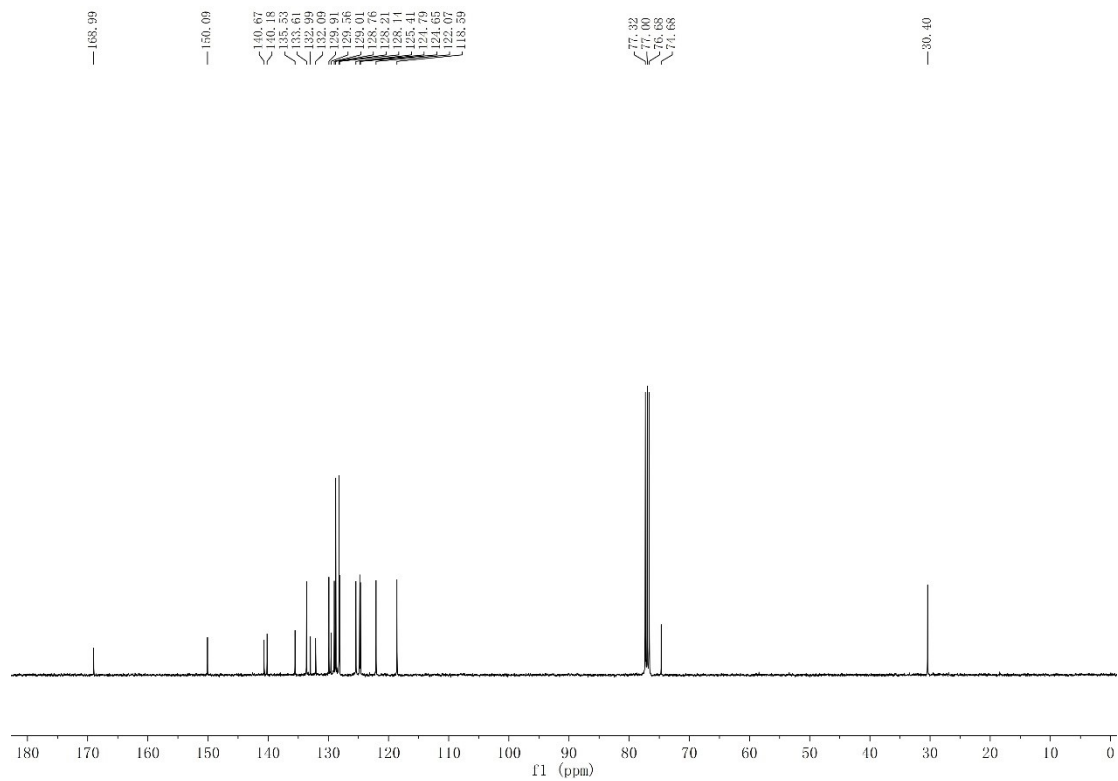

**3d-<sup>1</sup>H**

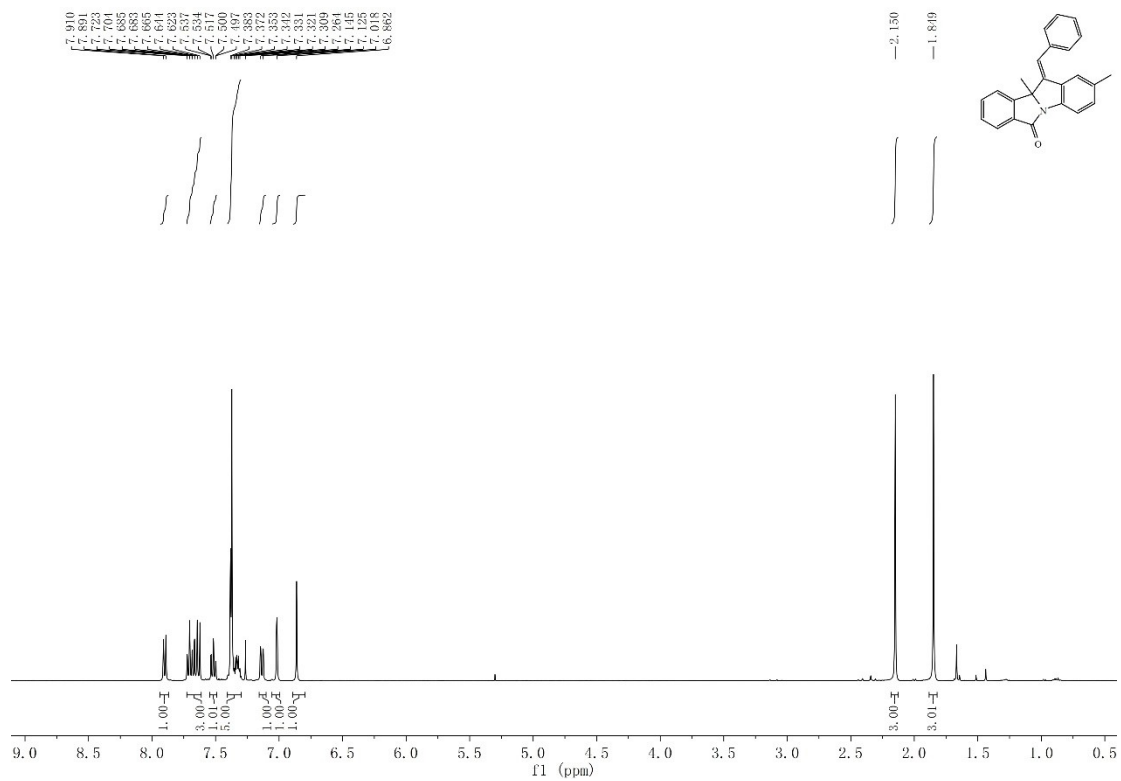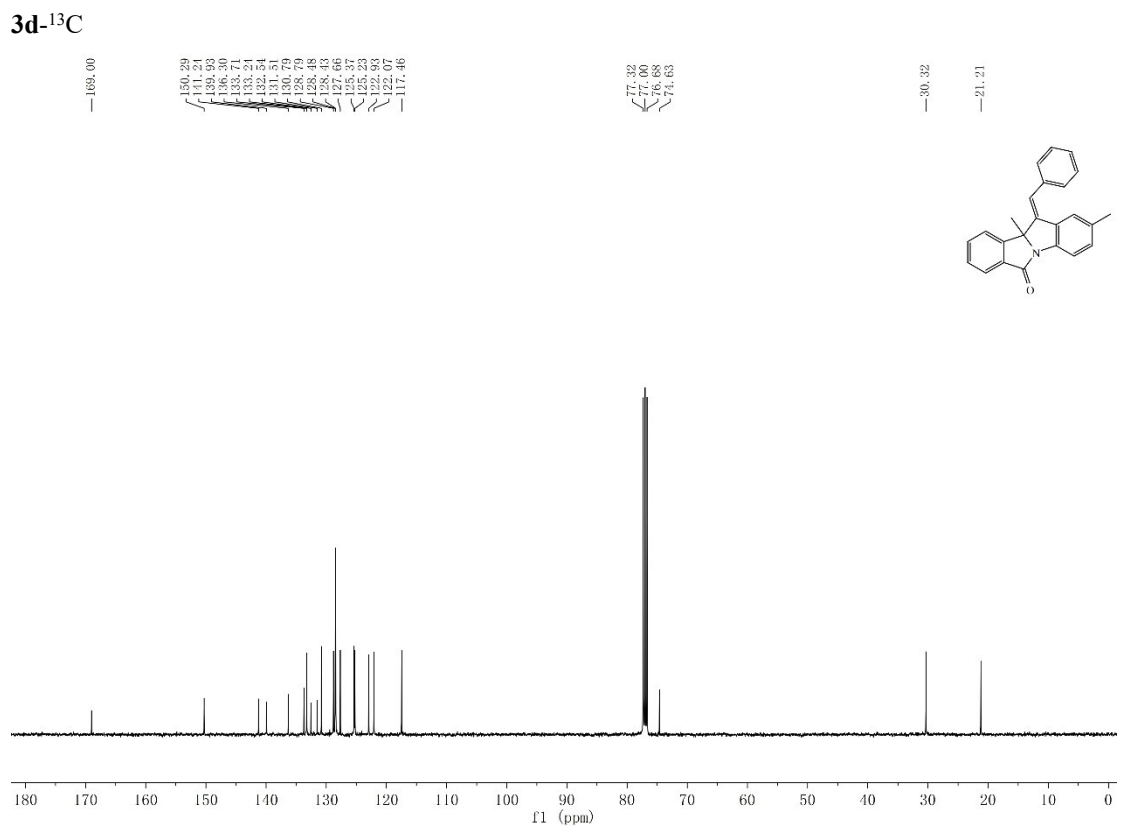

**3e-<sup>1</sup>H**

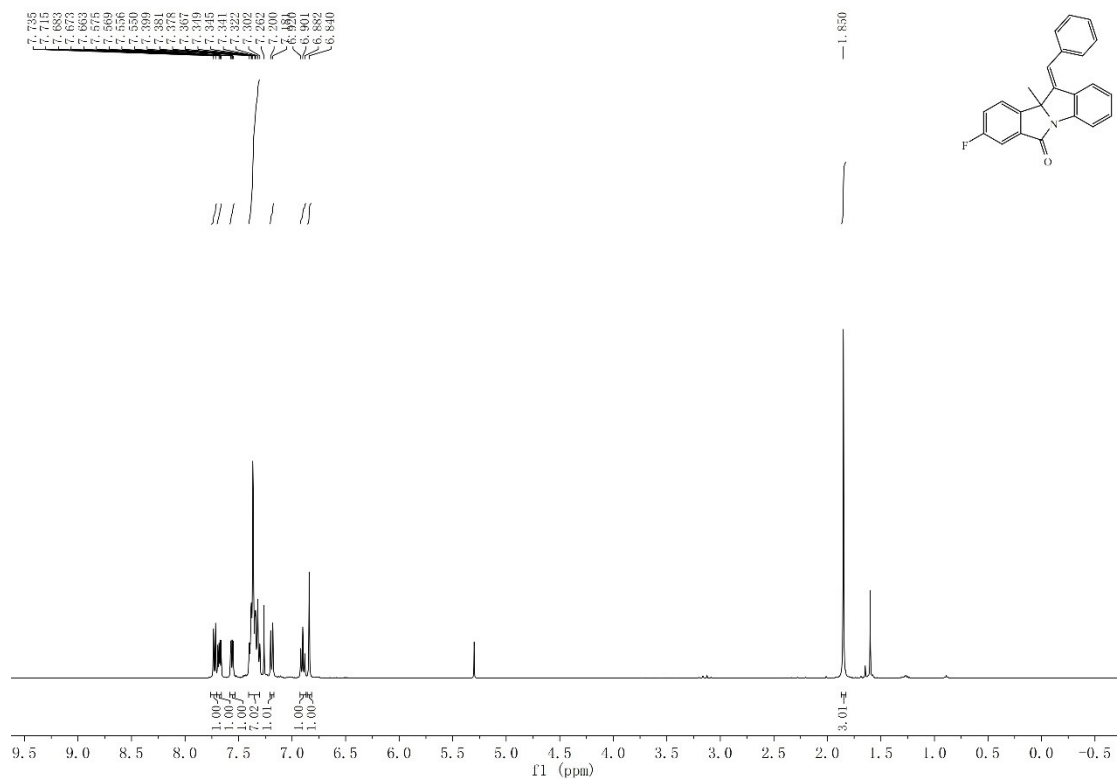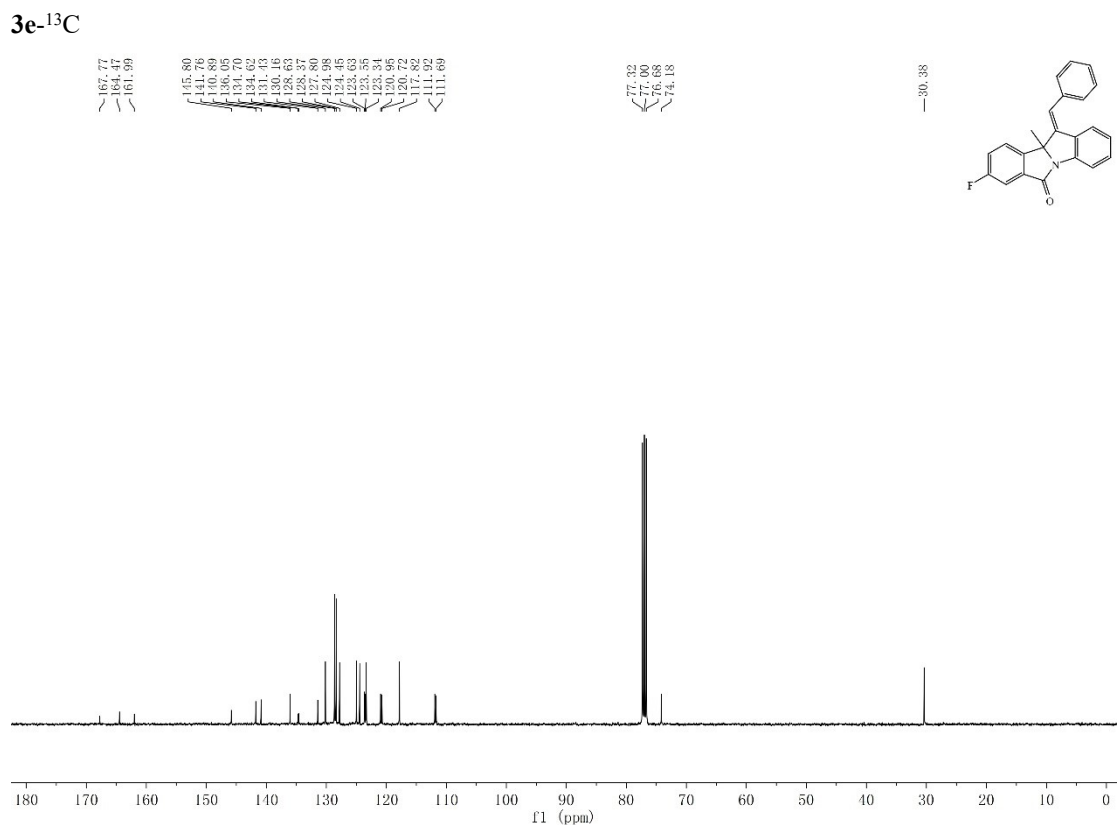

**3f-<sup>1</sup>H**

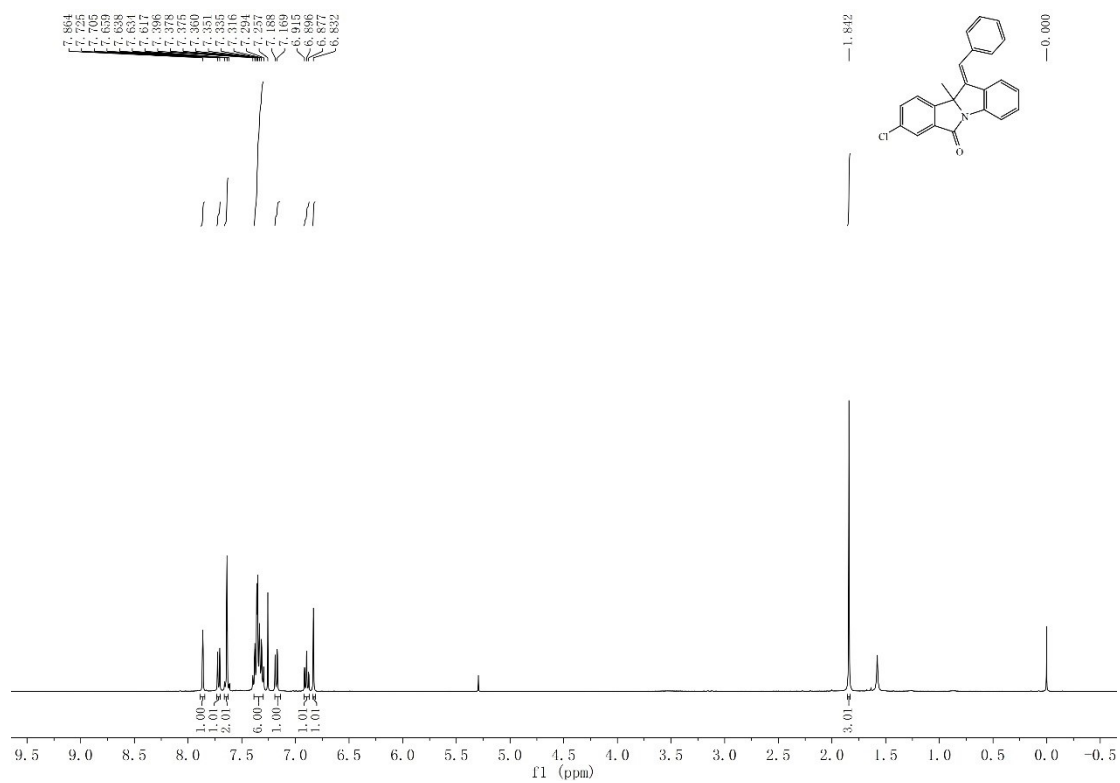

**3f-<sup>13</sup>C**

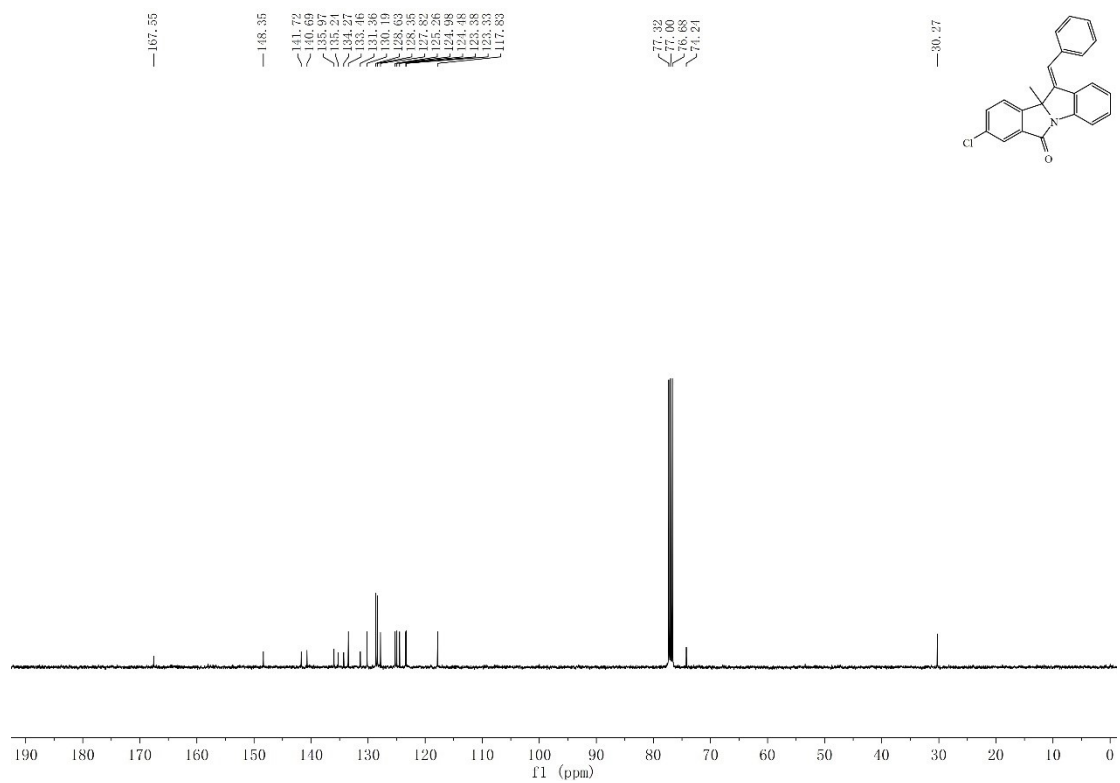

**3g-<sup>1</sup>H**

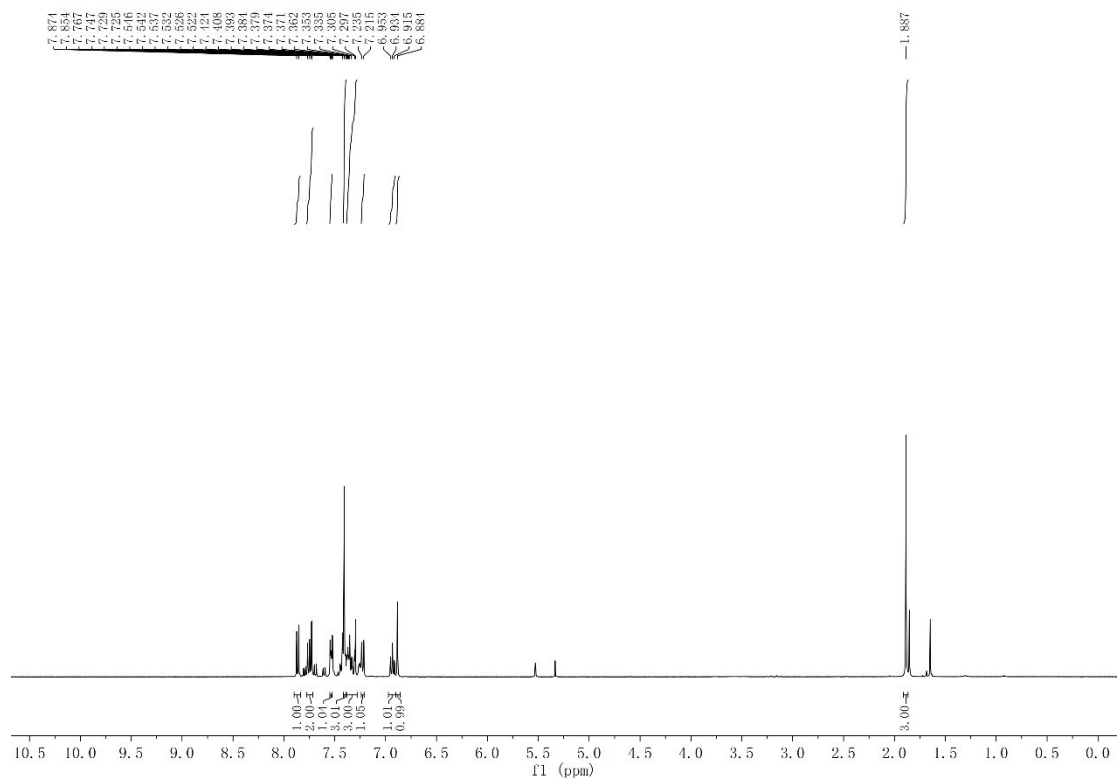

**3g-<sup>13</sup>C**

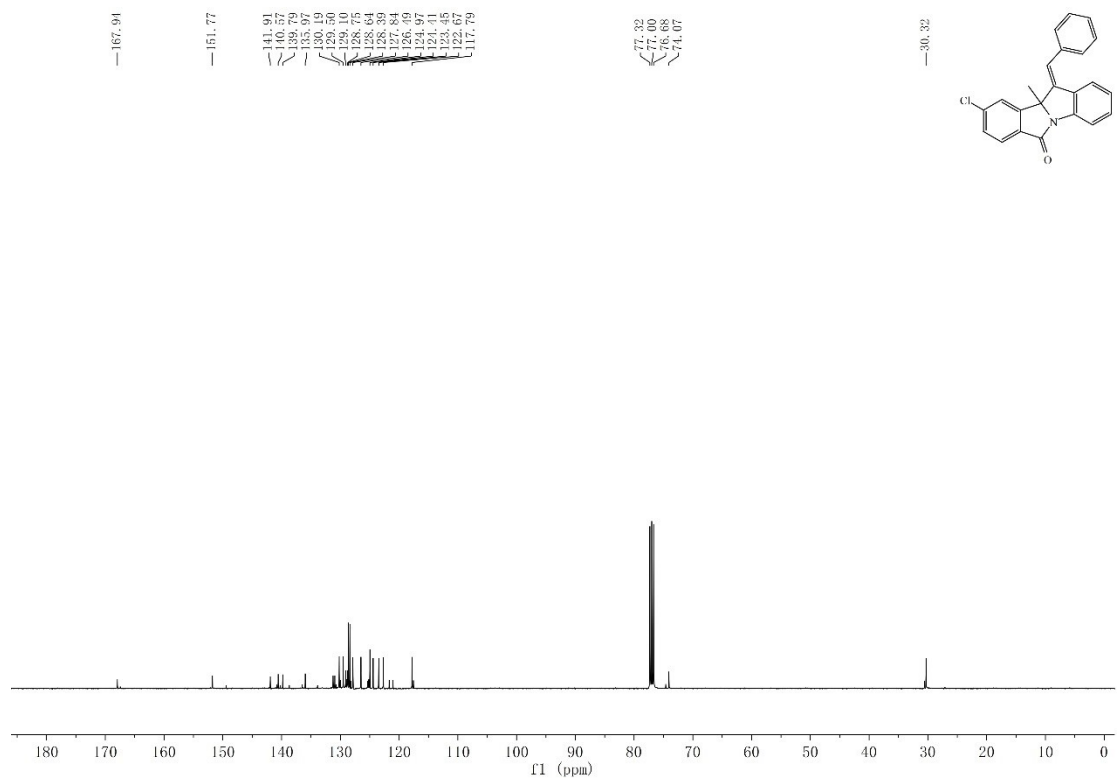

**3h-<sup>1</sup>H**



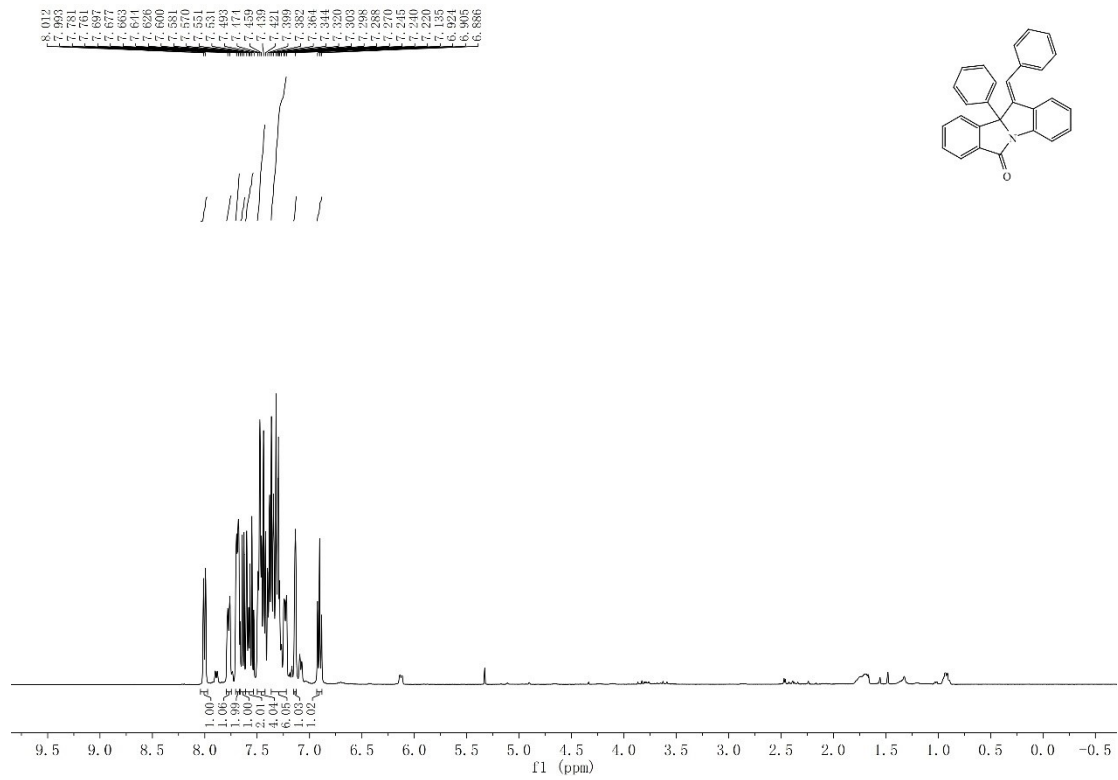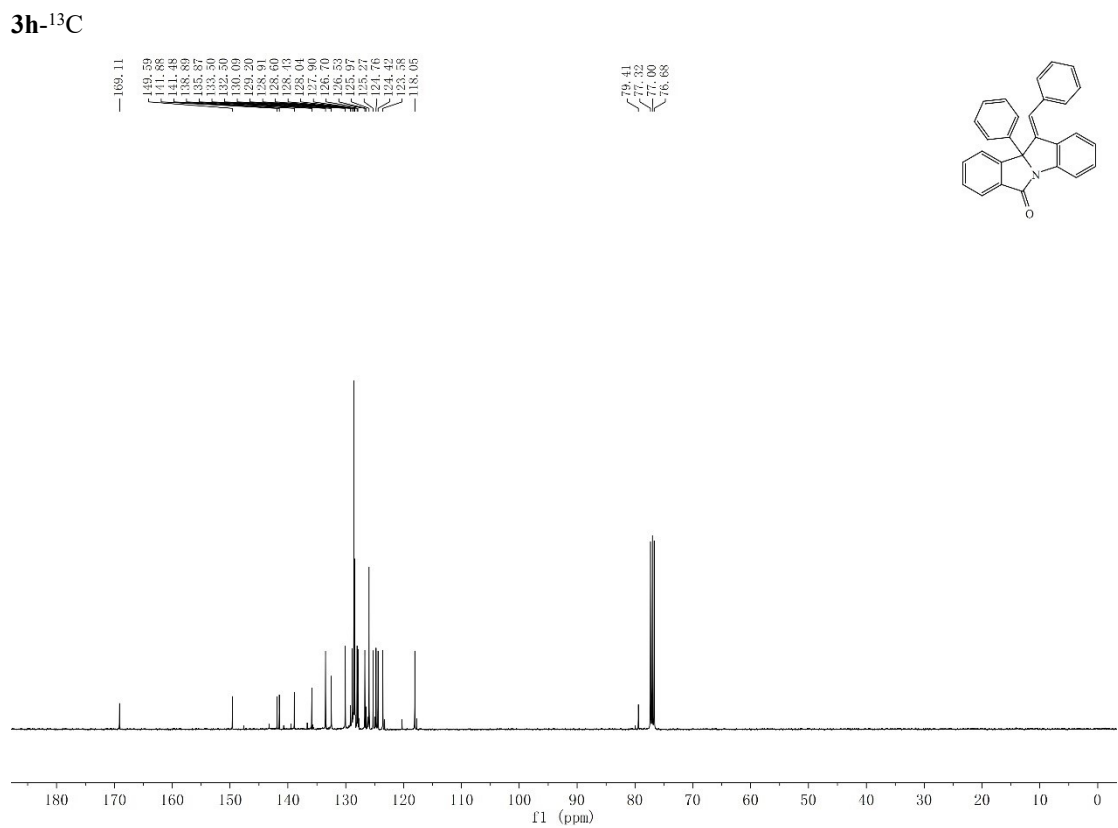

**3i-<sup>1</sup>H**

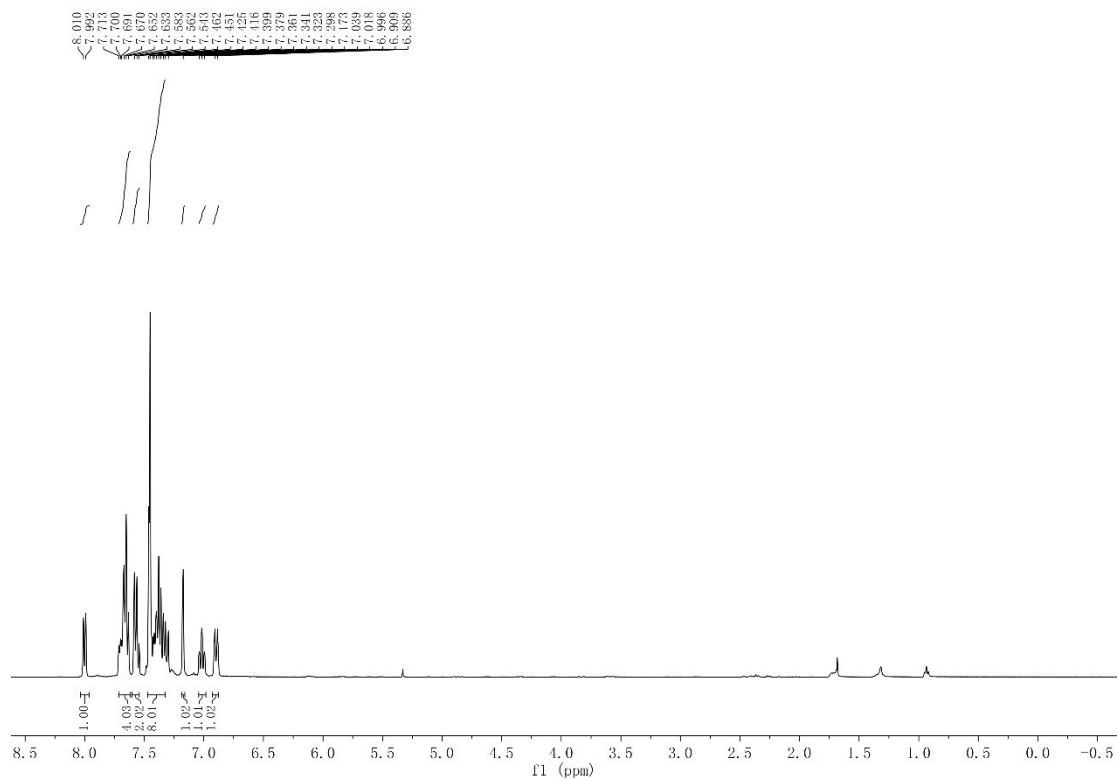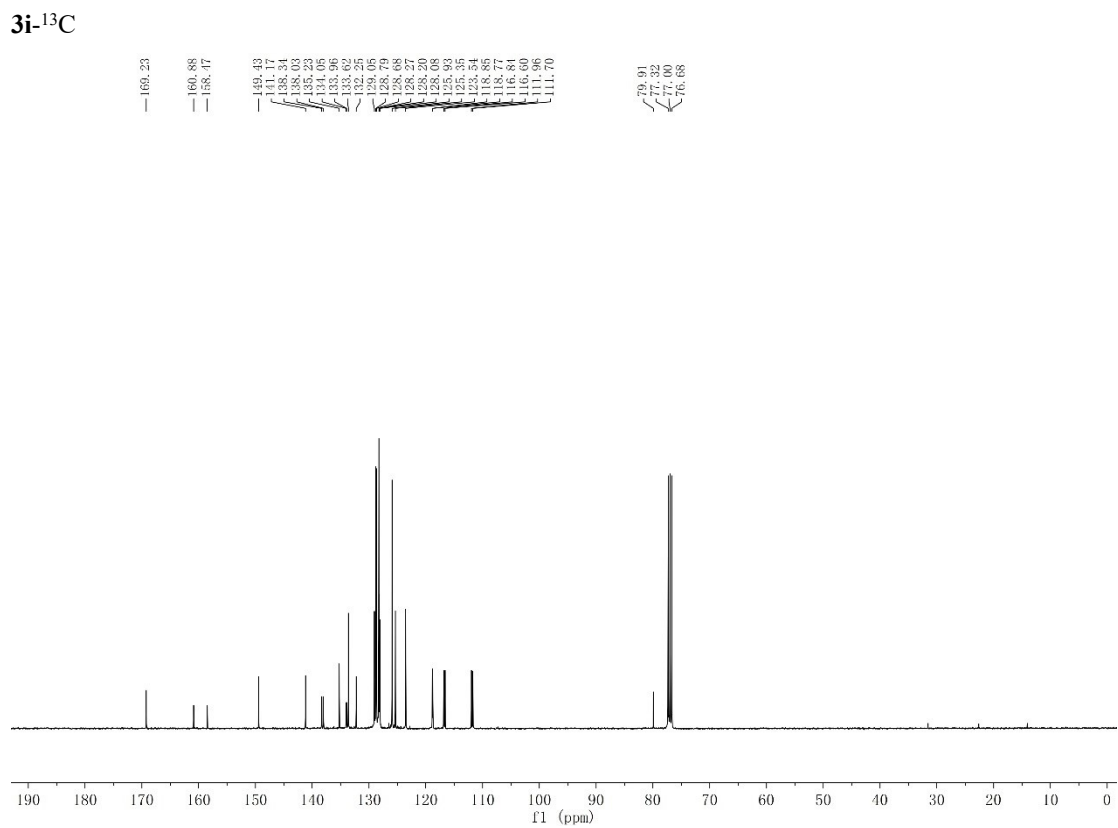

**3j-<sup>1</sup>H**

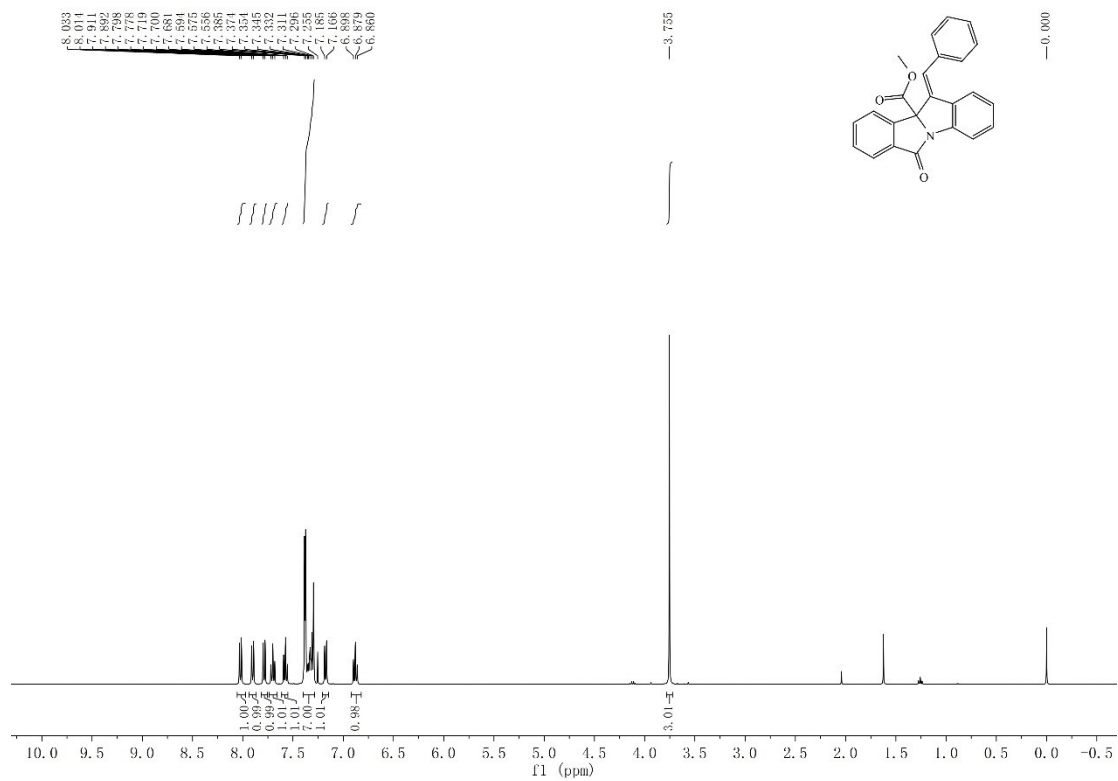

**3j-<sup>13</sup>C**

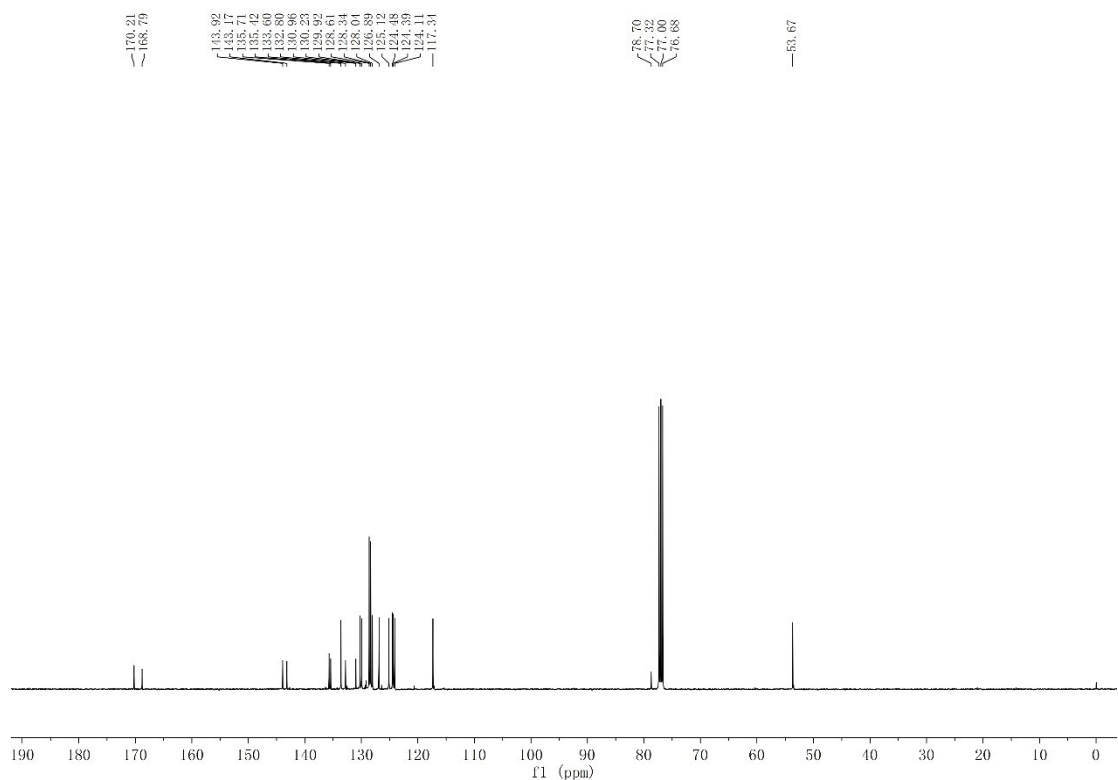

**5a-<sup>1</sup>H**

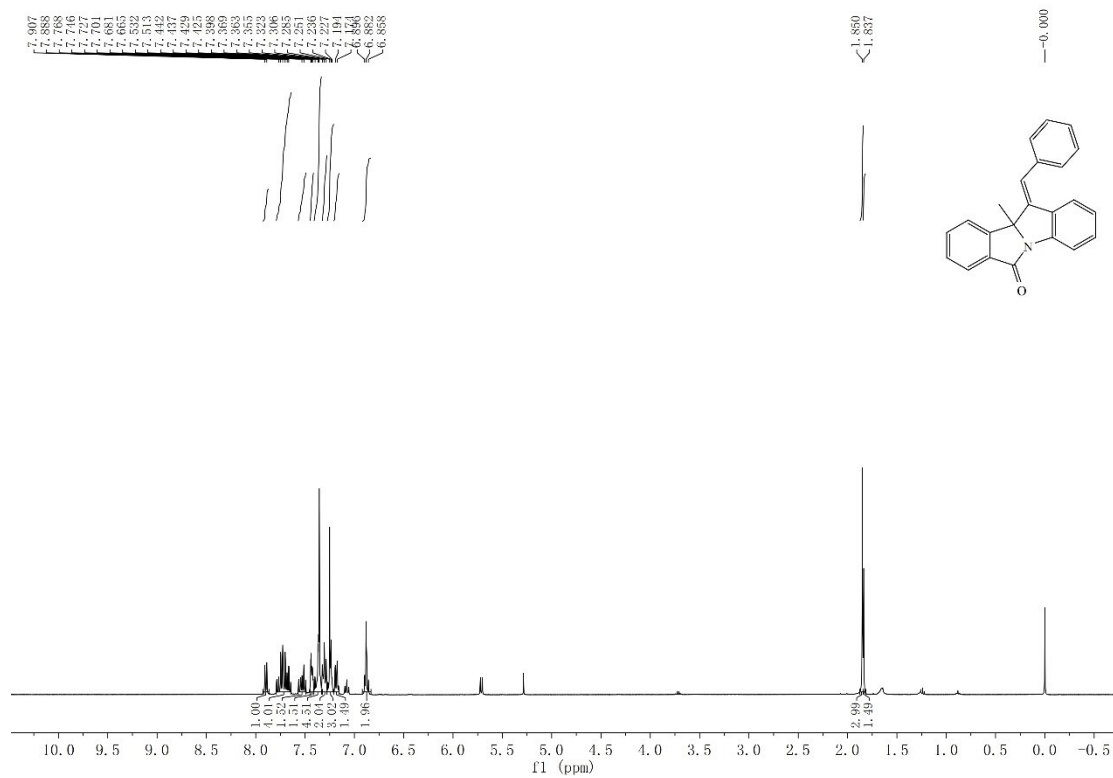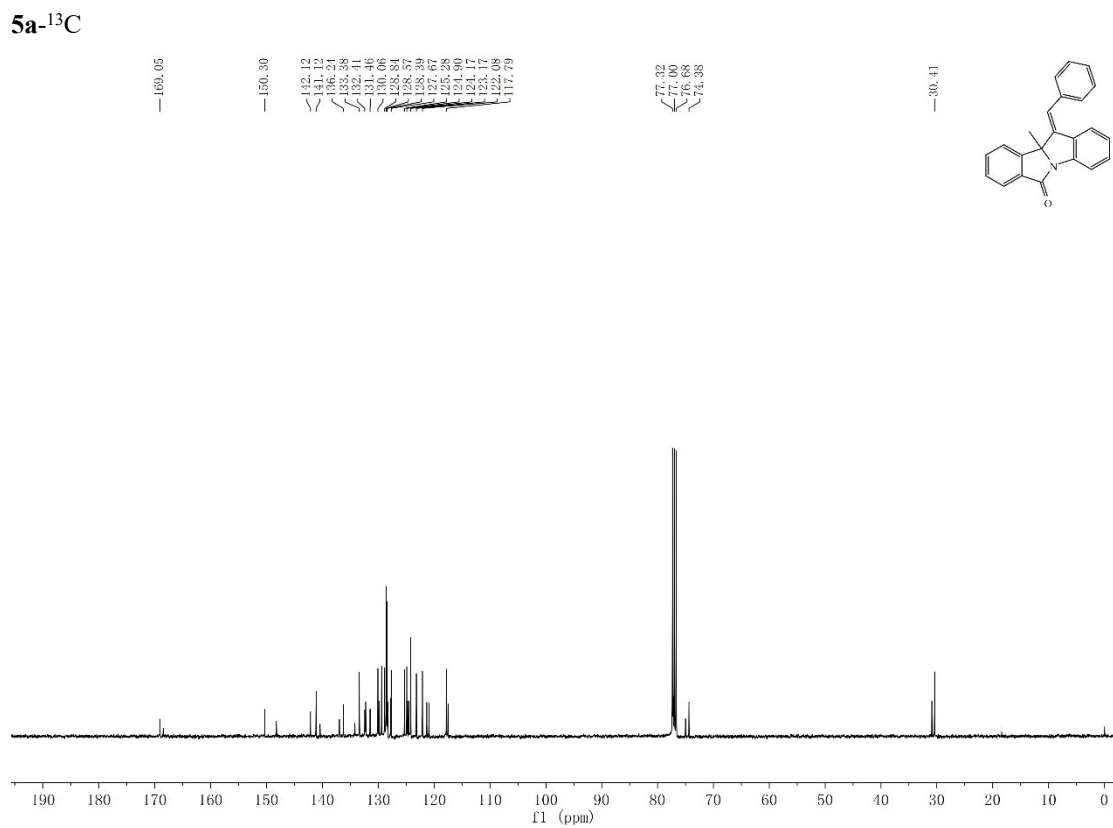

**5b-<sup>1</sup>H**

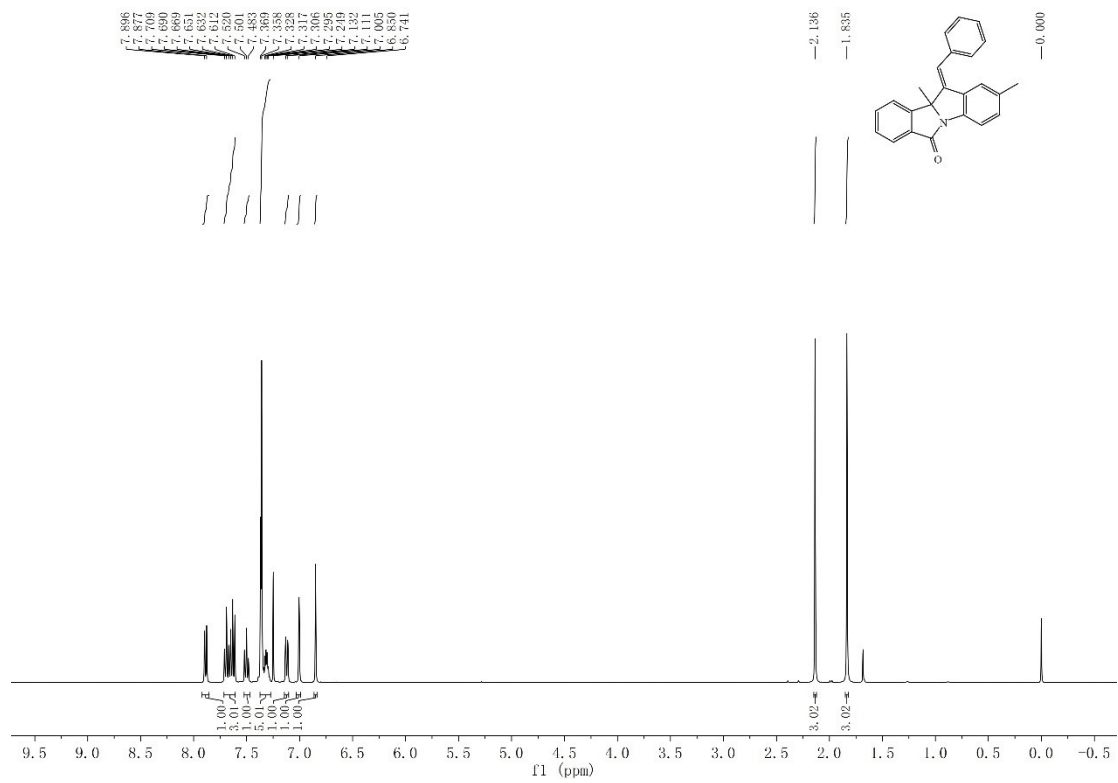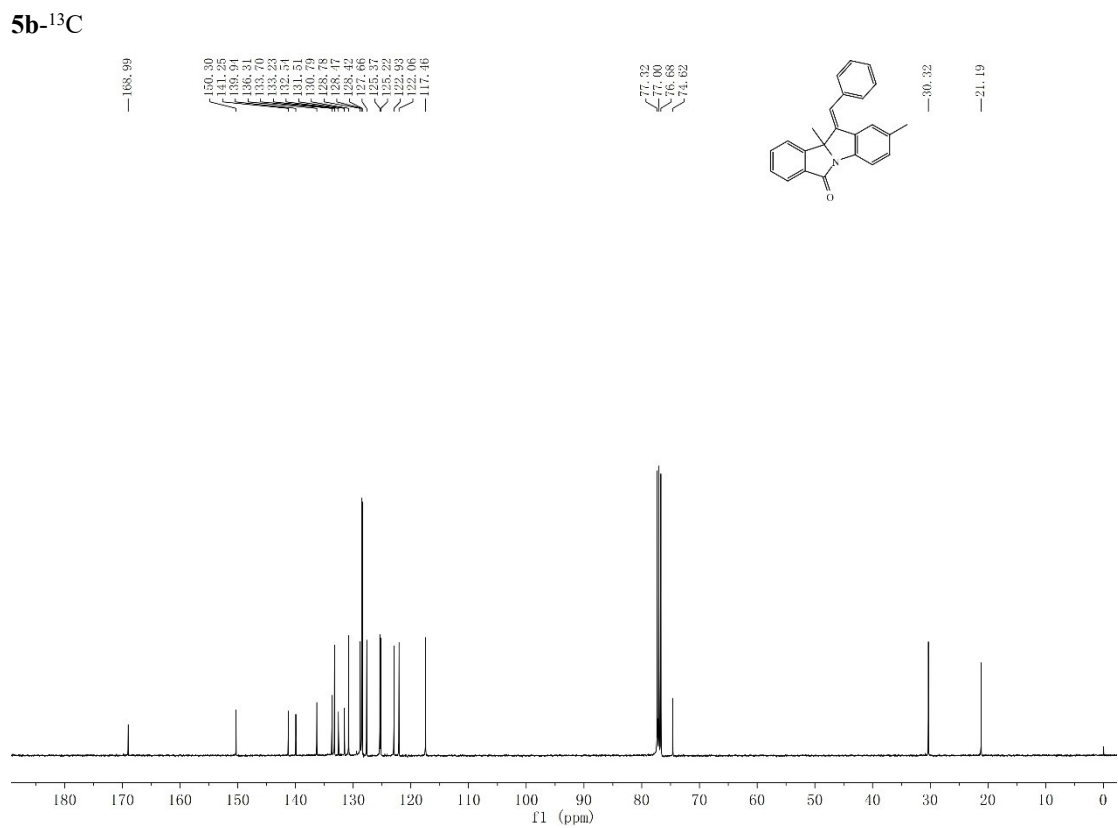

**5c-<sup>1</sup>H**

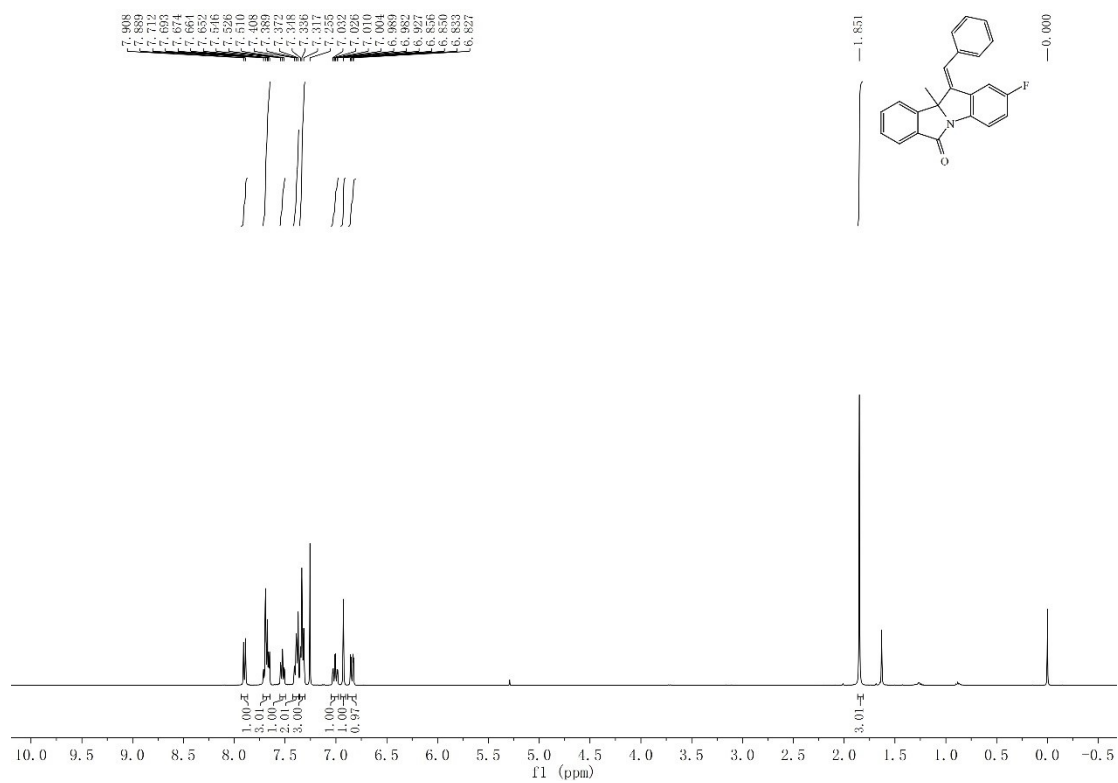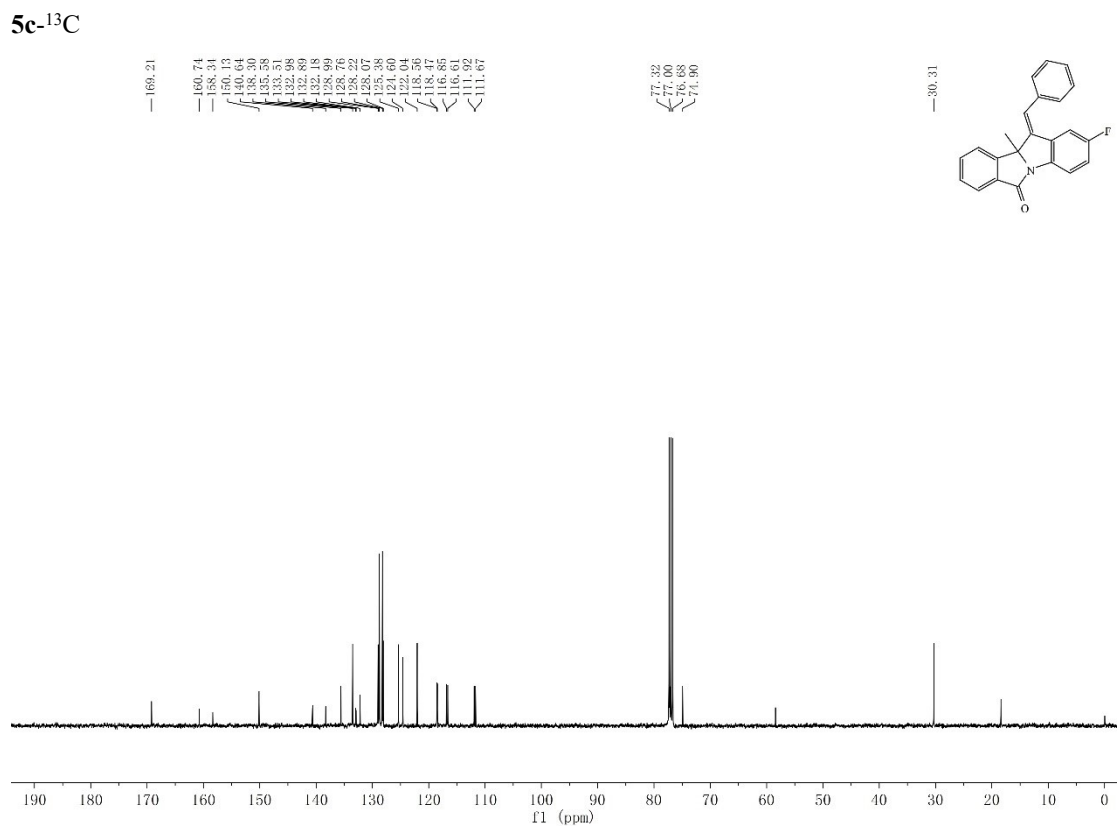

**5d-<sup>1</sup>H**

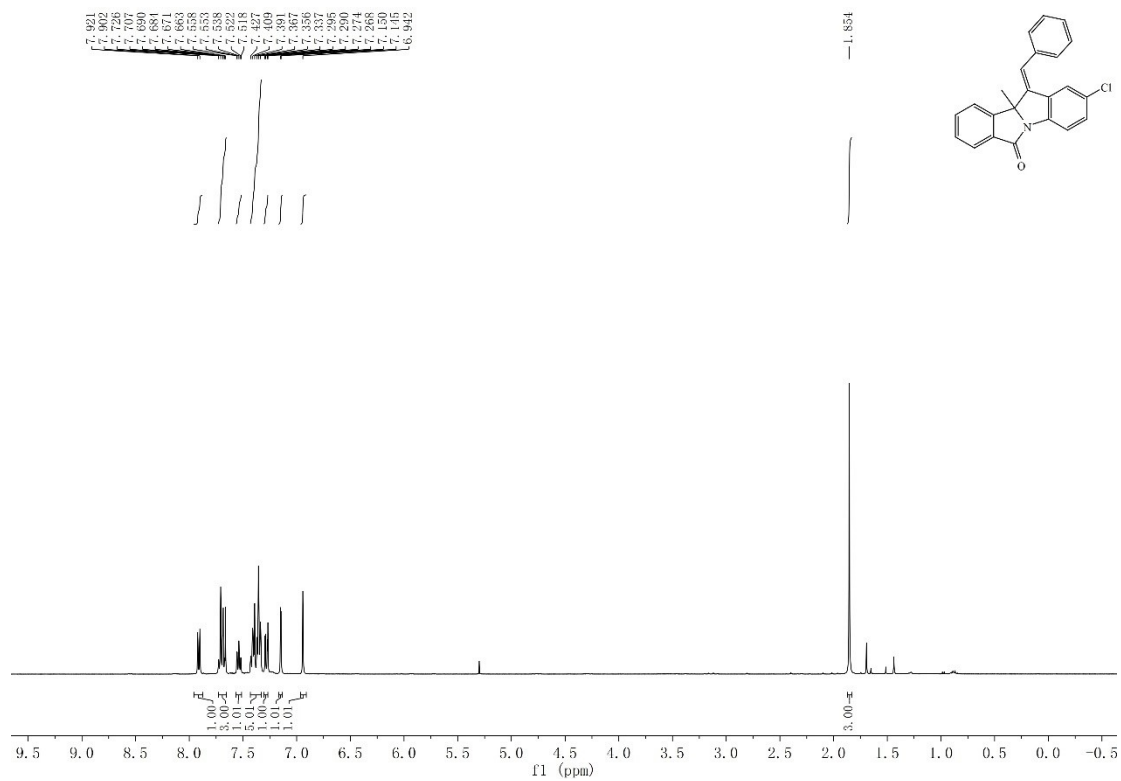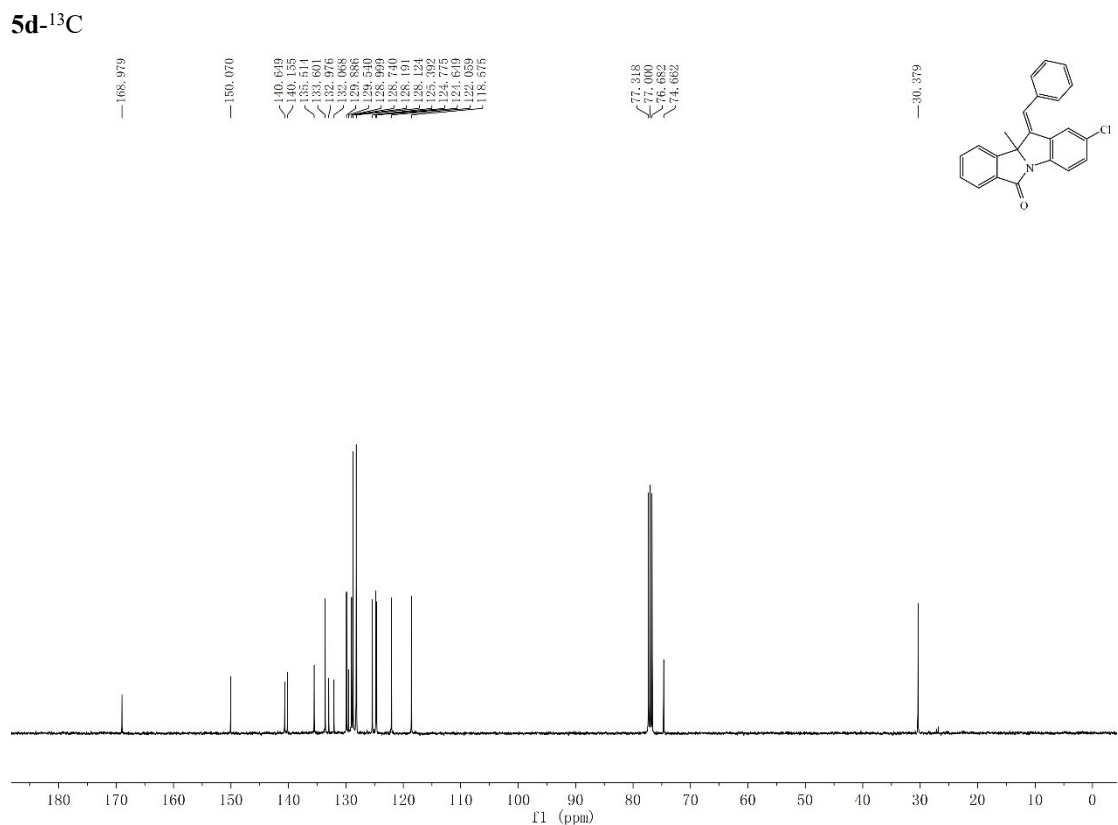

**5e-<sup>1</sup>H**

7.962  
7.911  
7.828  
7.726  
7.702  
7.652  
7.639  
7.622  
7.603  
7.594  
7.581  
7.531  
7.511  
7.492  
7.472  
7.394  
7.376  
7.357  
7.335  
7.280  
7.260  
7.200  
7.200  
7.200  
7.203  
7.184  
7.166  
7.139  
7.100  
7.100  
7.080  
7.041  
7.022  
6.980

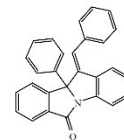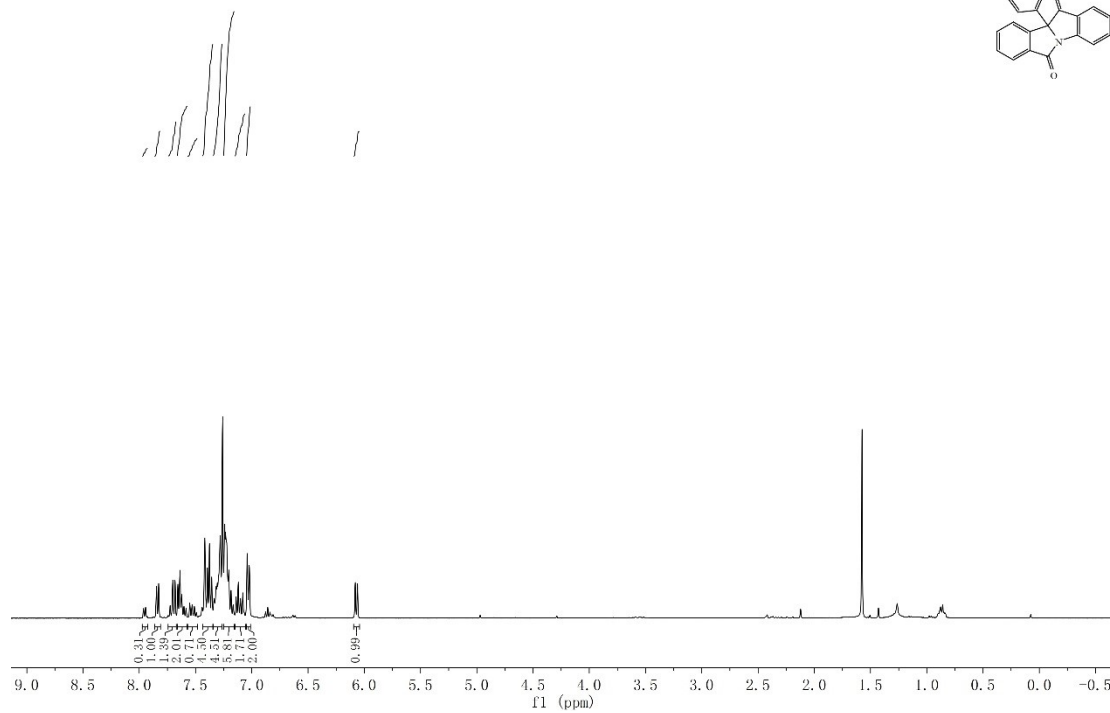

5e-<sup>13</sup>C

169.11  
149.59  
141.88  
141.48  
135.89  
135.50  
132.50  
130.09  
128.20  
128.60  
128.43  
128.04  
127.70  
126.53  
125.97  
125.27  
124.46  
123.58  
118.05

79.41  
77.32  
77.00  
76.08

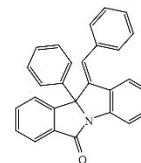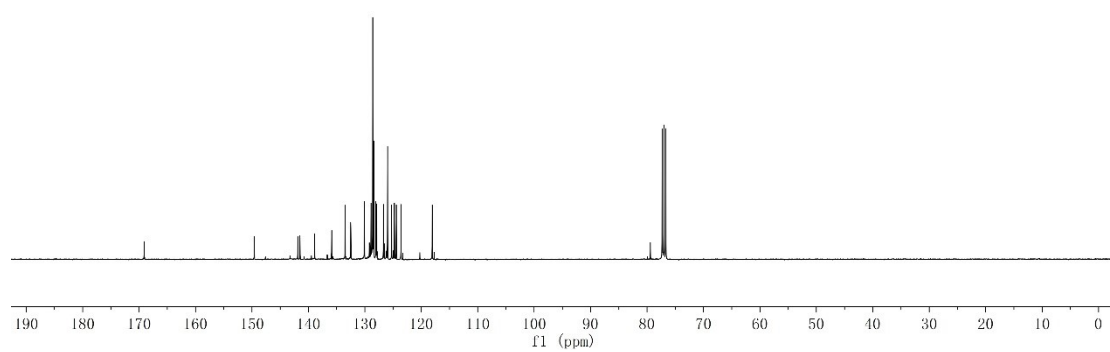

5f-<sup>1</sup>H



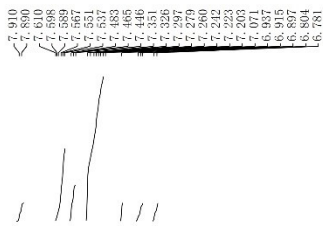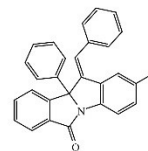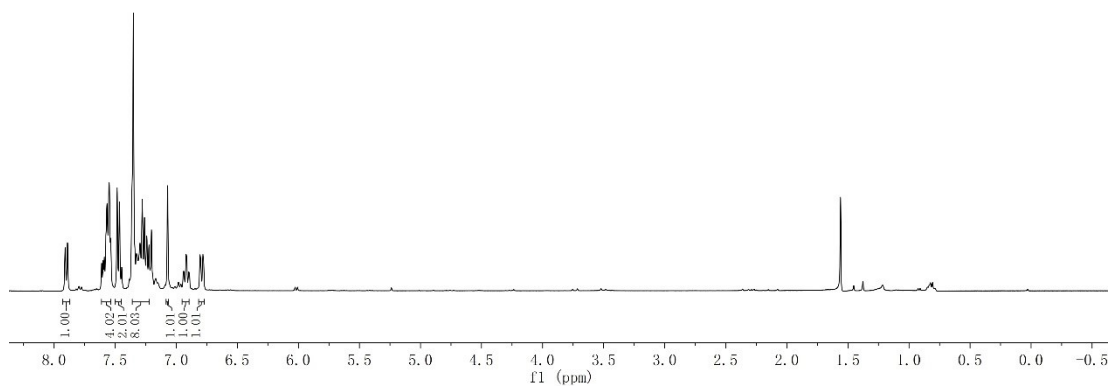

5f-<sup>13</sup>C

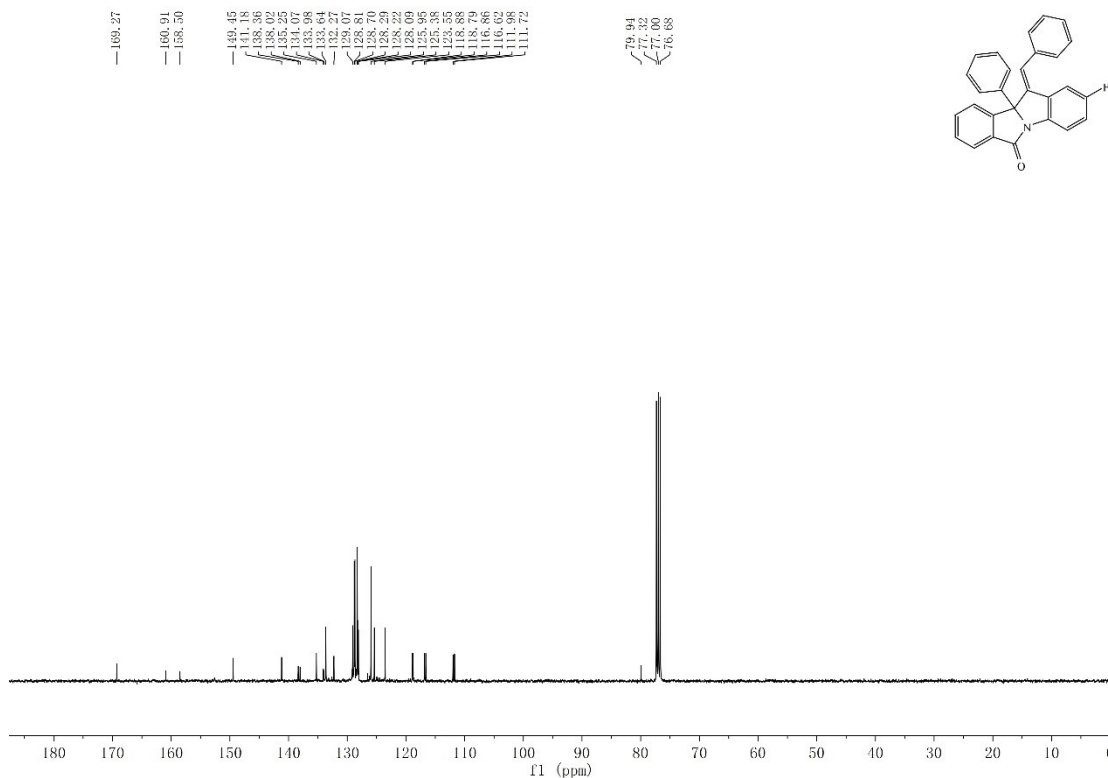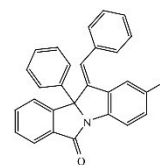

5g-<sup>1</sup>H

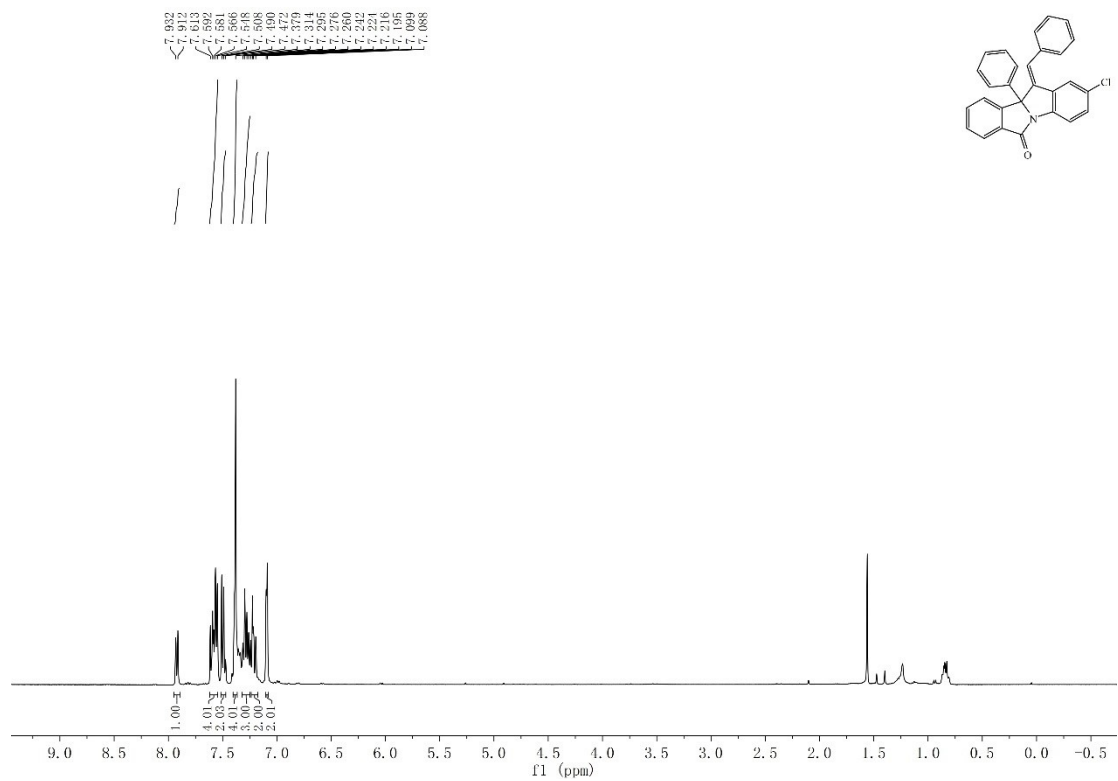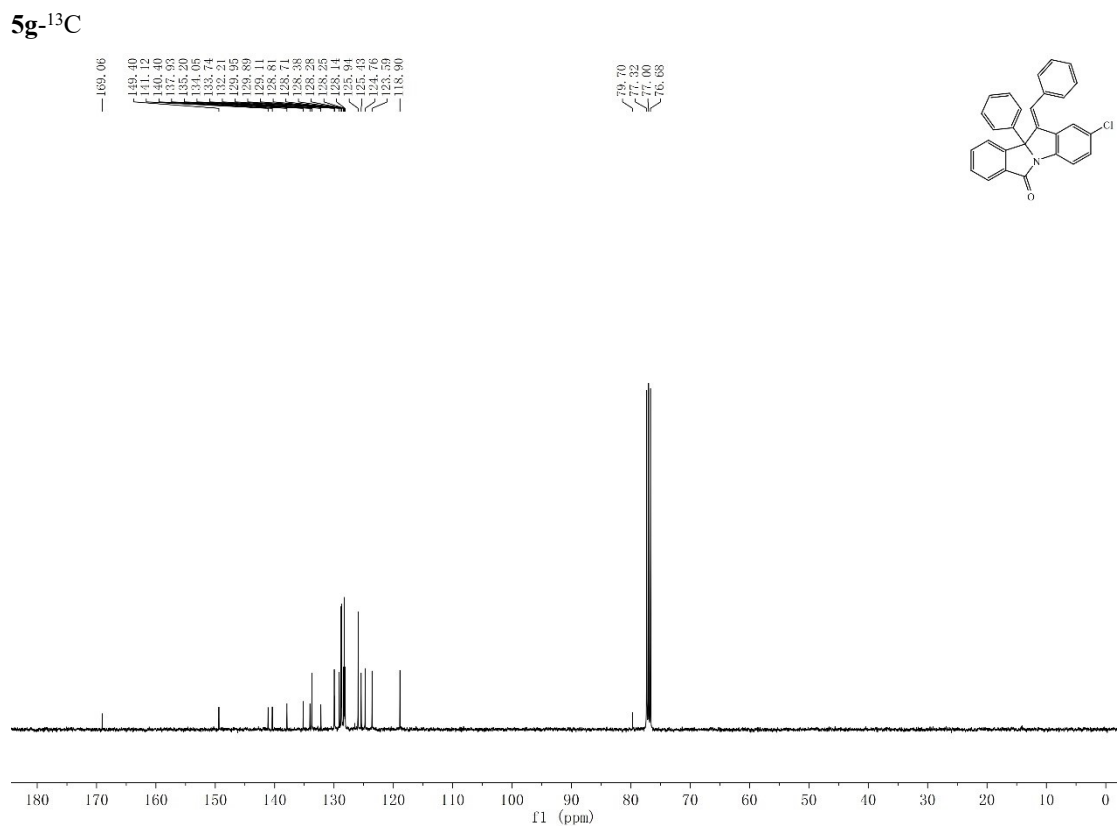

**5h-<sup>1</sup>H**

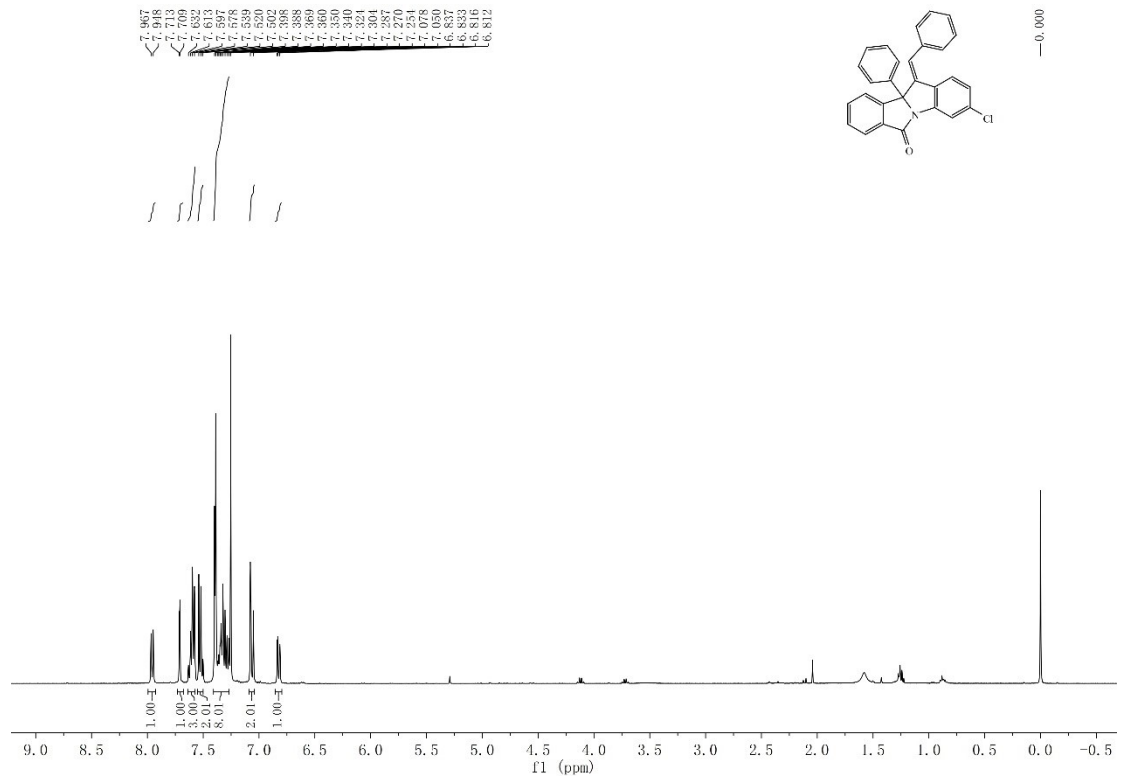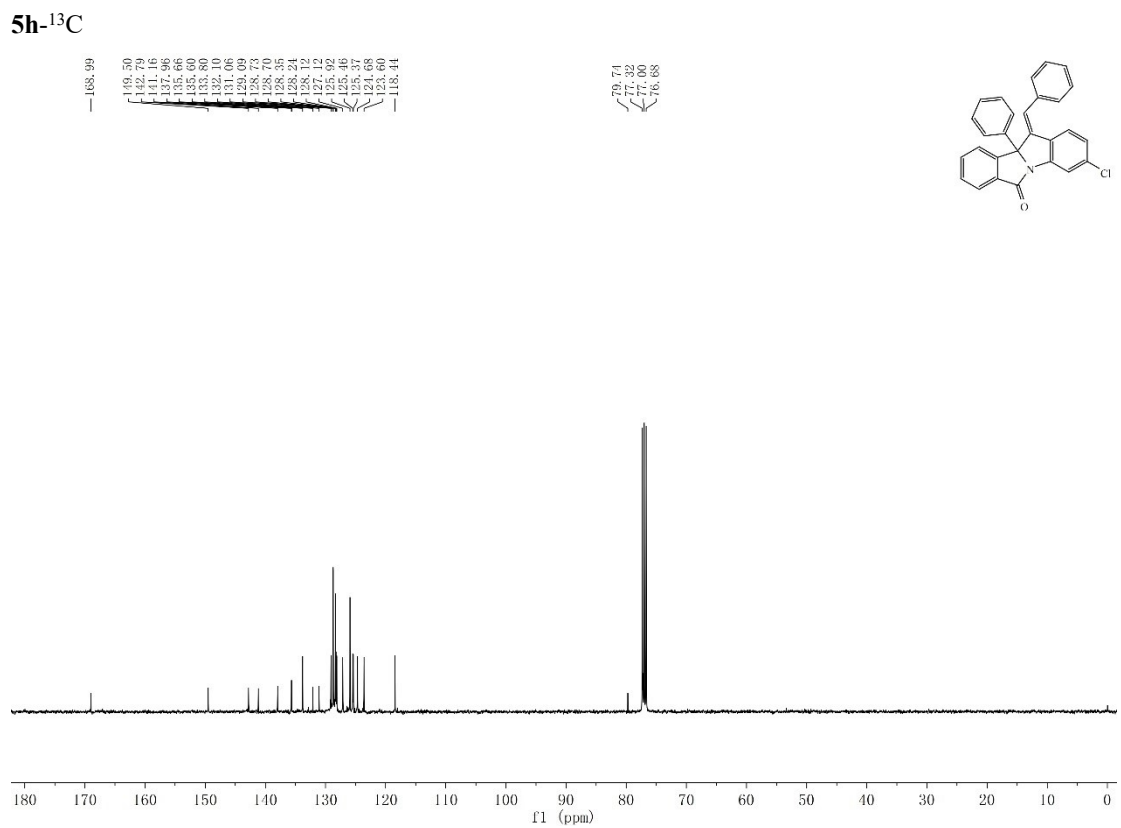

**5i-<sup>1</sup>H**

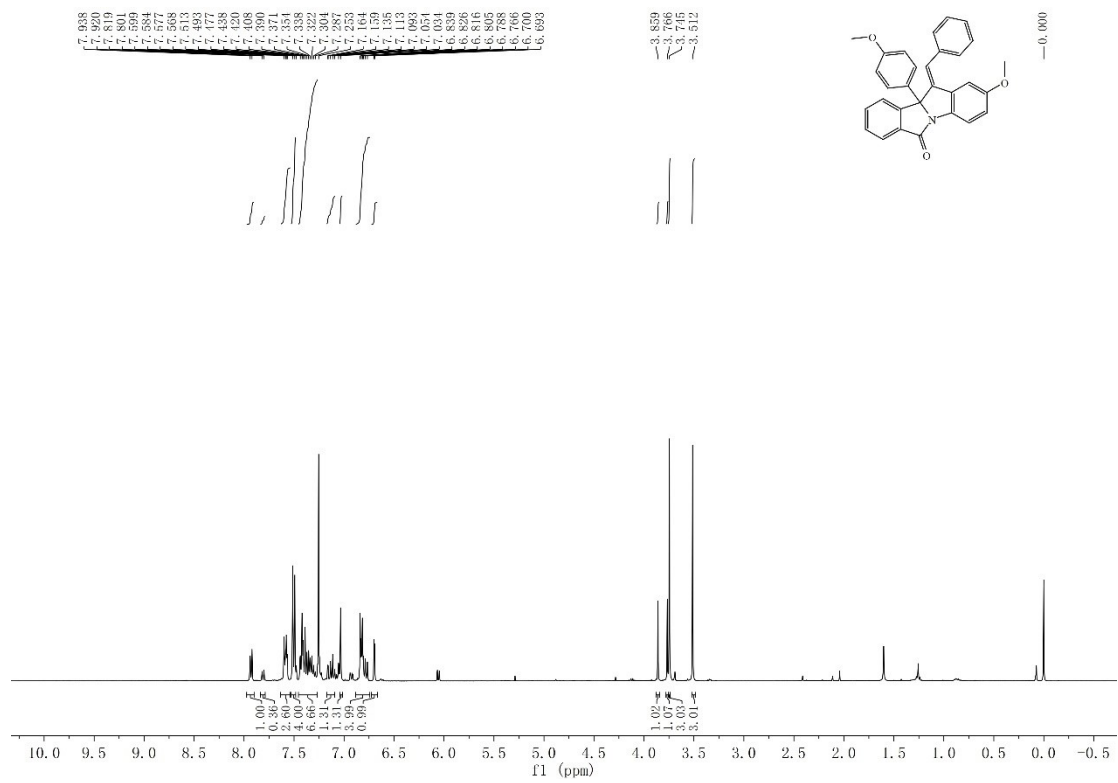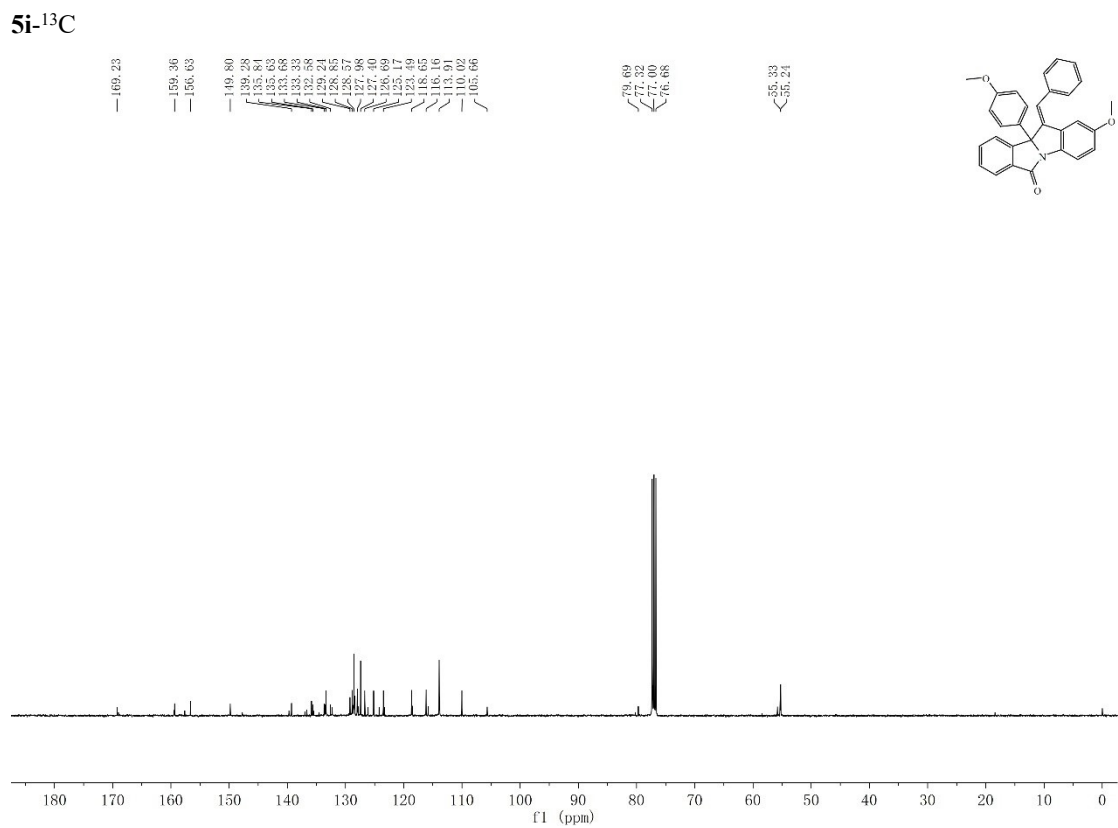

**5j-<sup>1</sup>H**

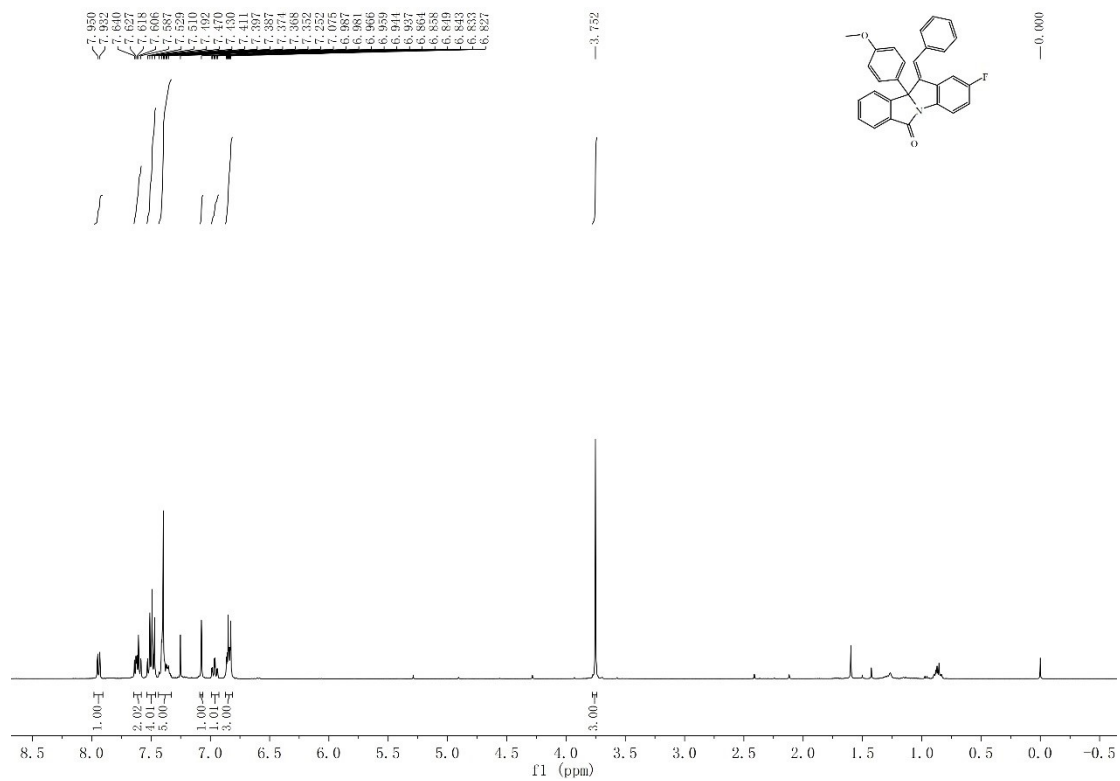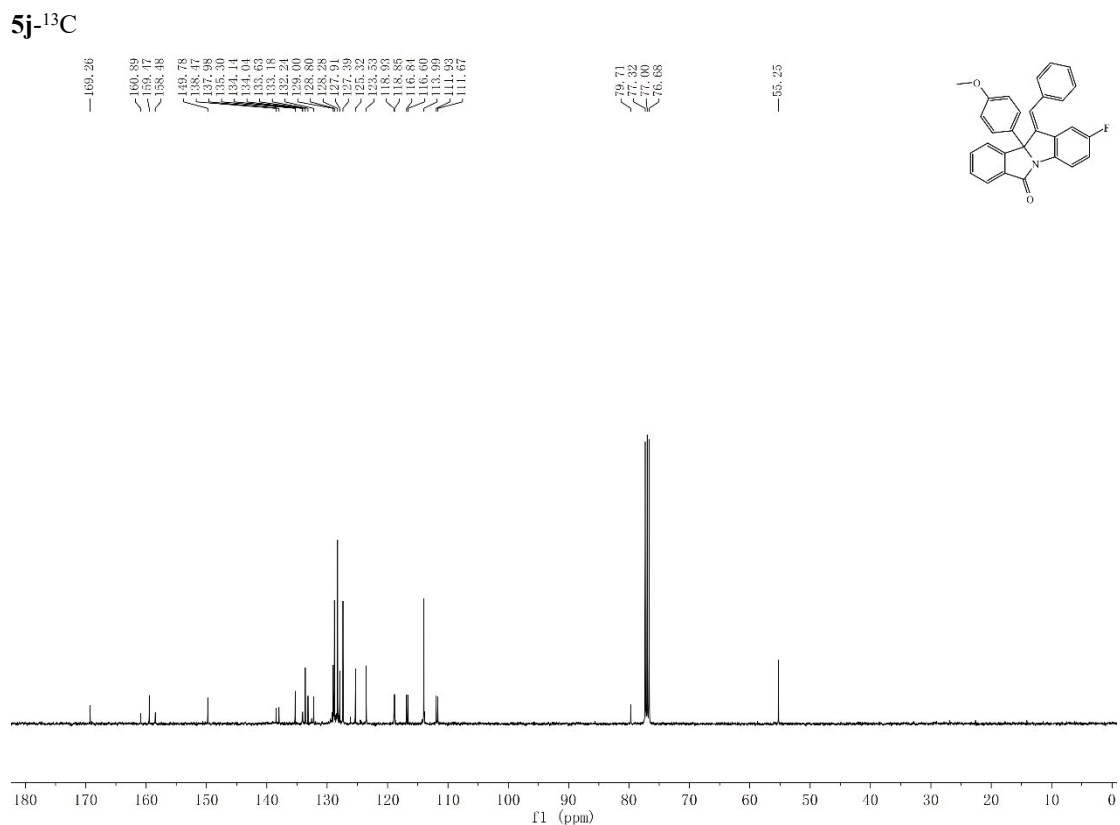

**5k-<sup>1</sup>H**

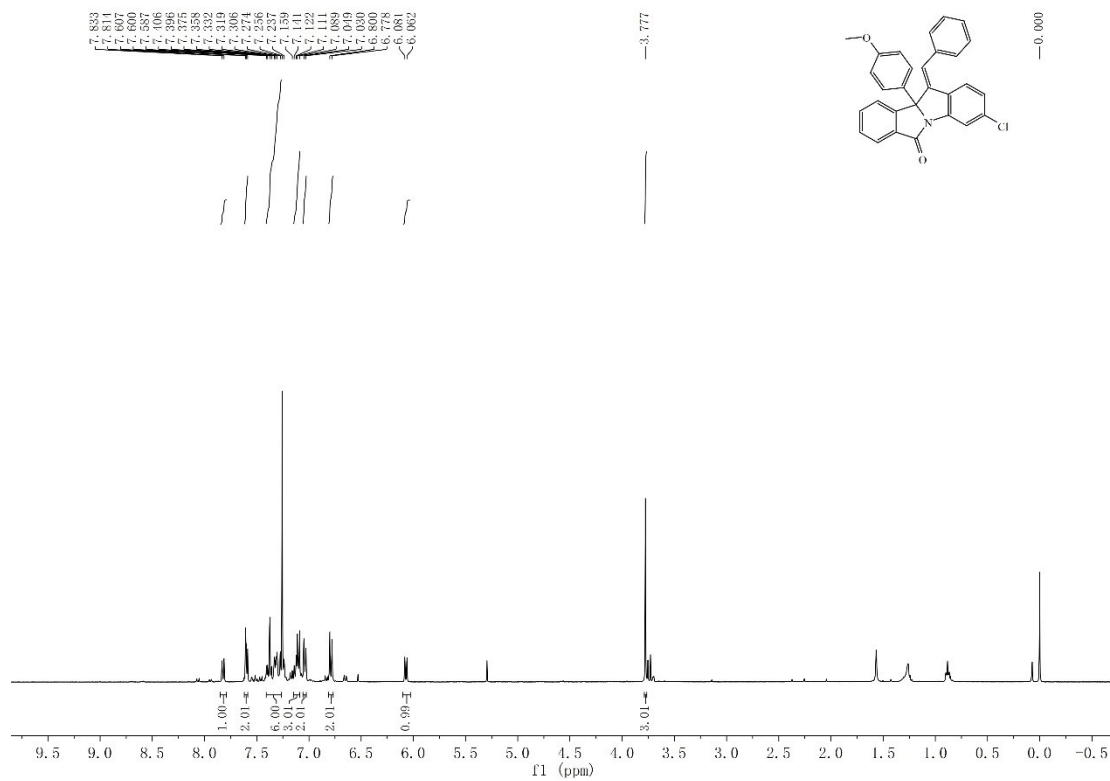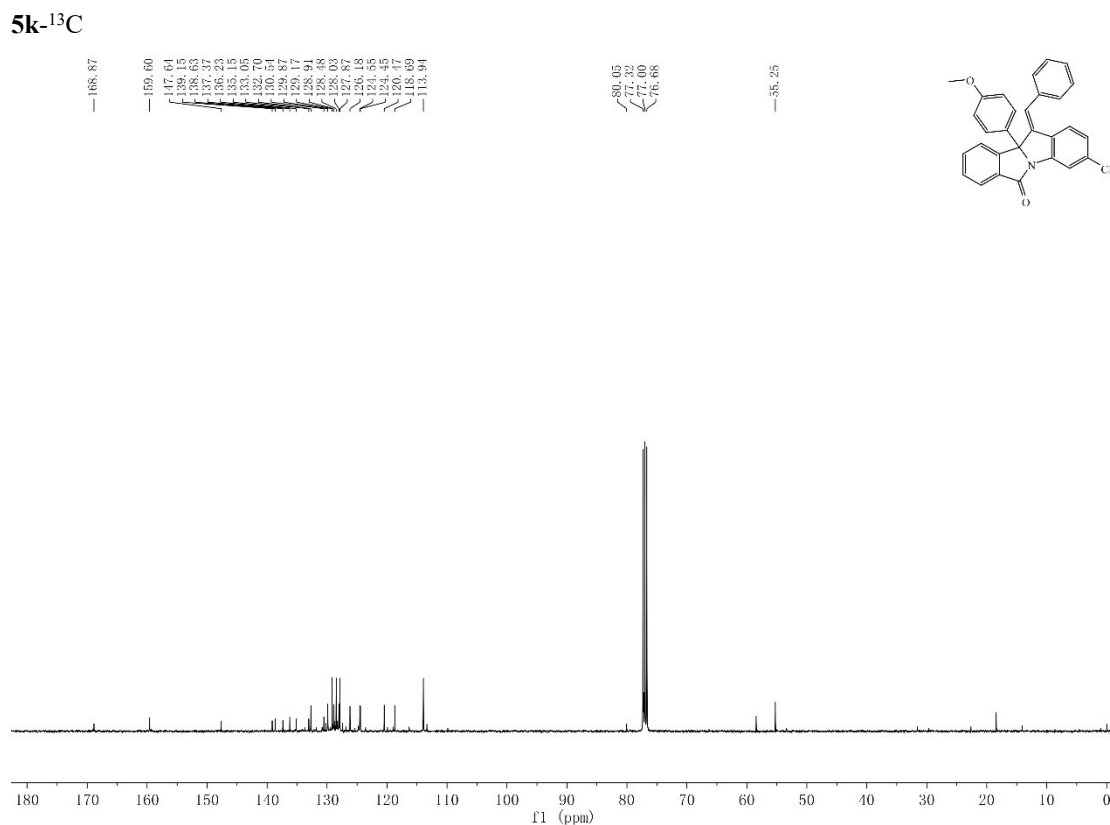

**5l-<sup>1</sup>H**

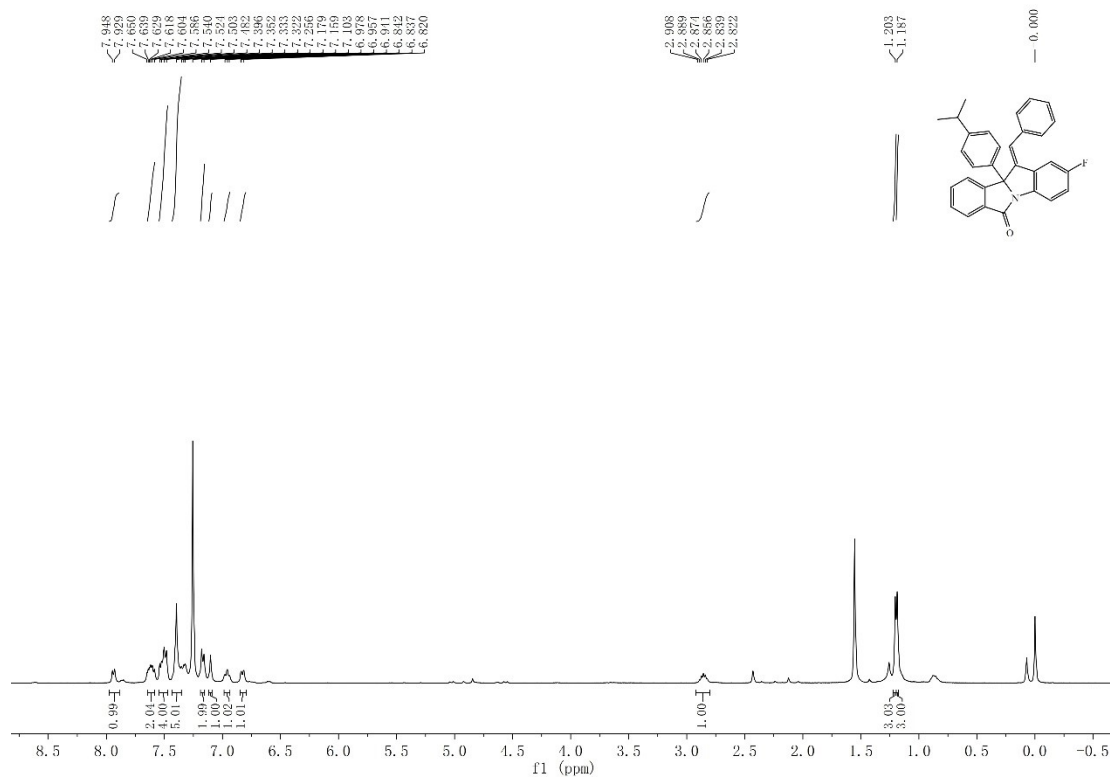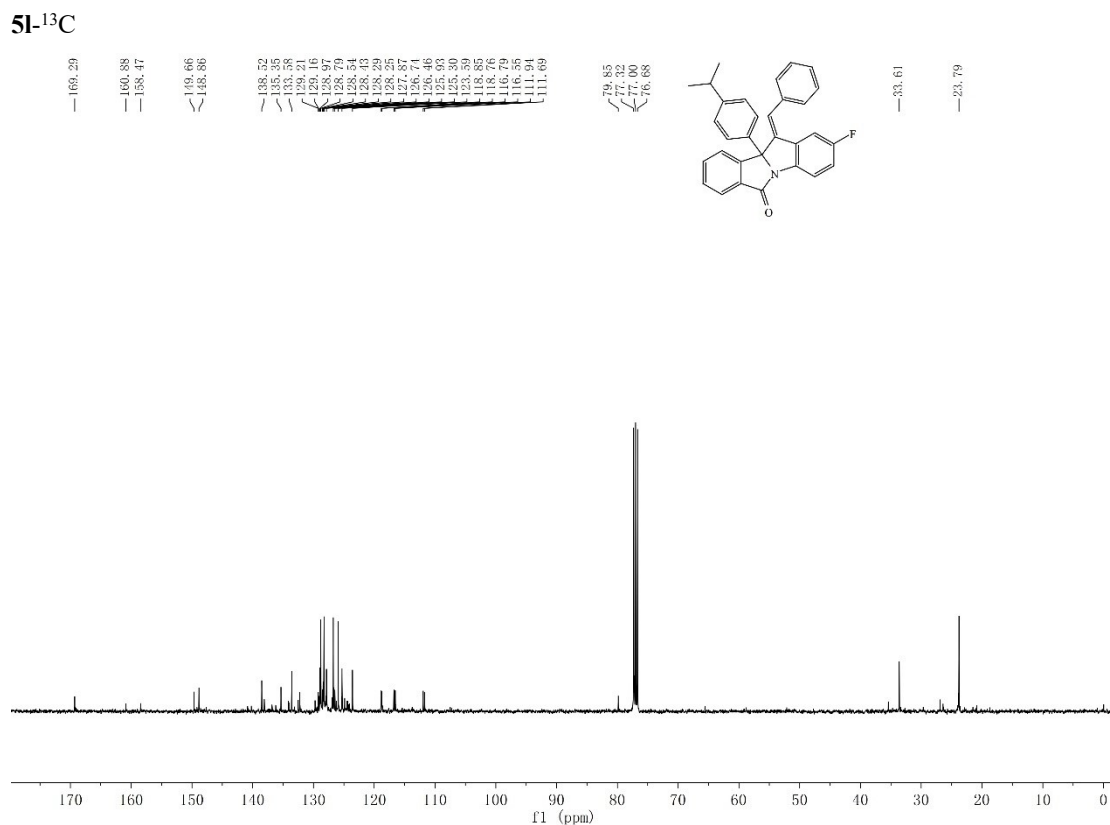

**5m-<sup>1</sup>H**

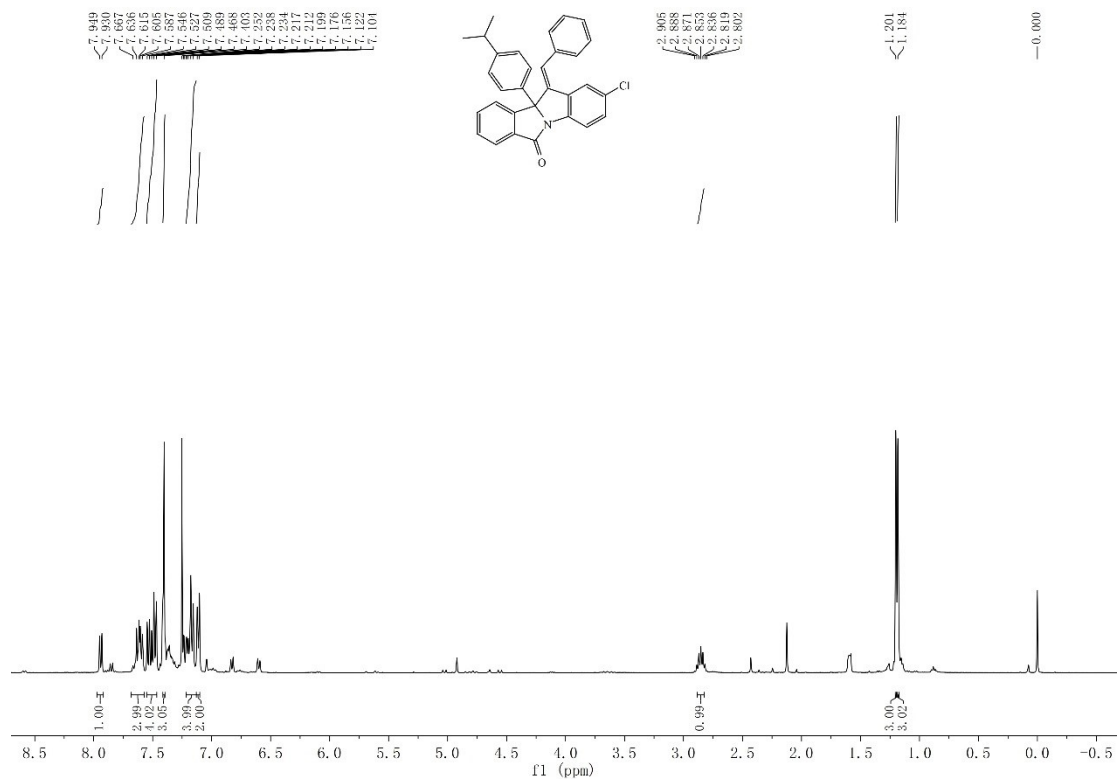

**5m-<sup>13</sup>C**

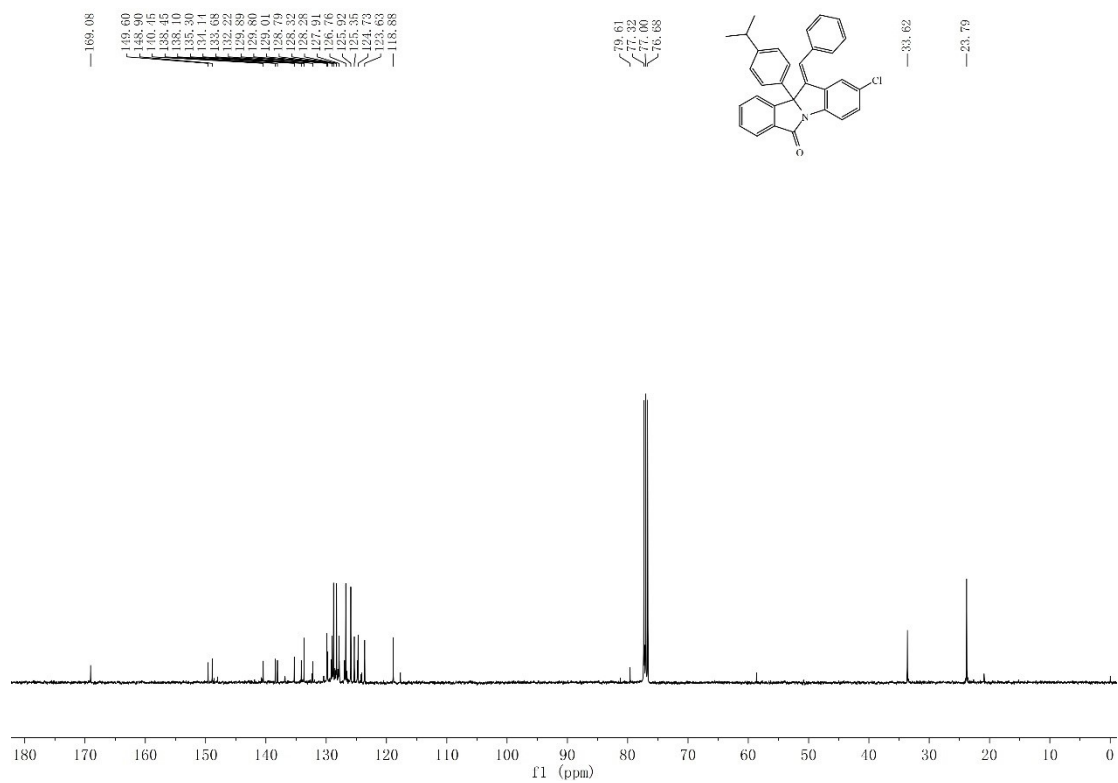

**5n-<sup>1</sup>H**



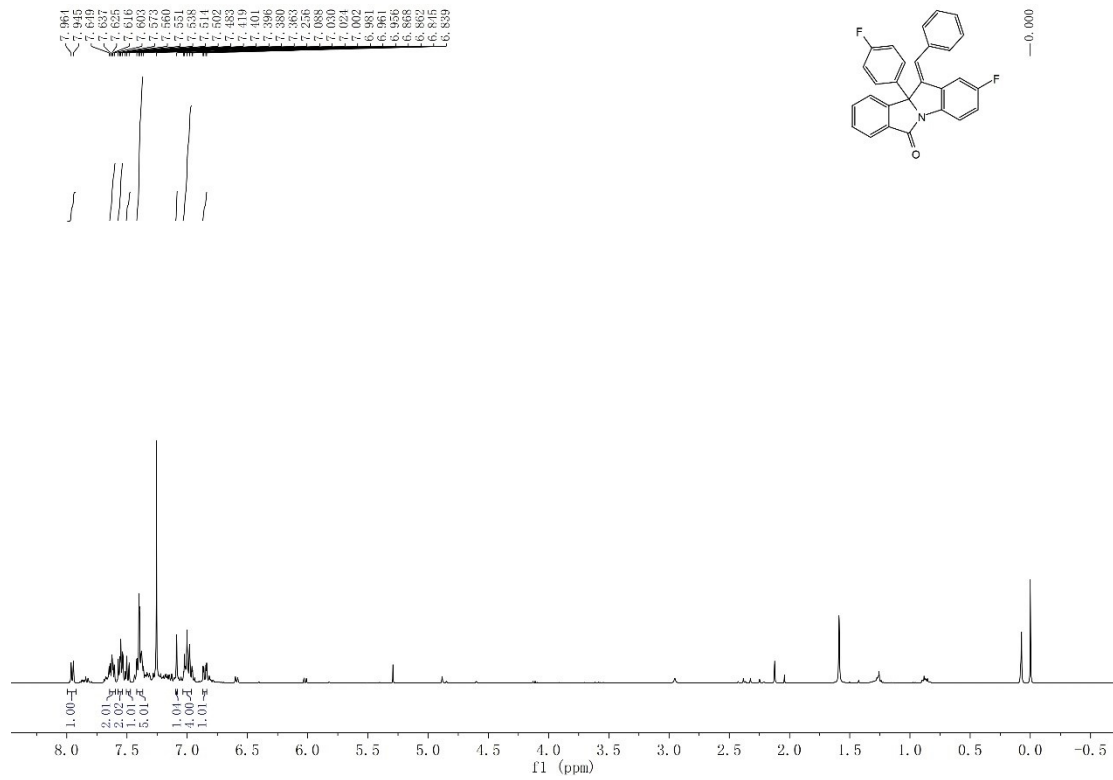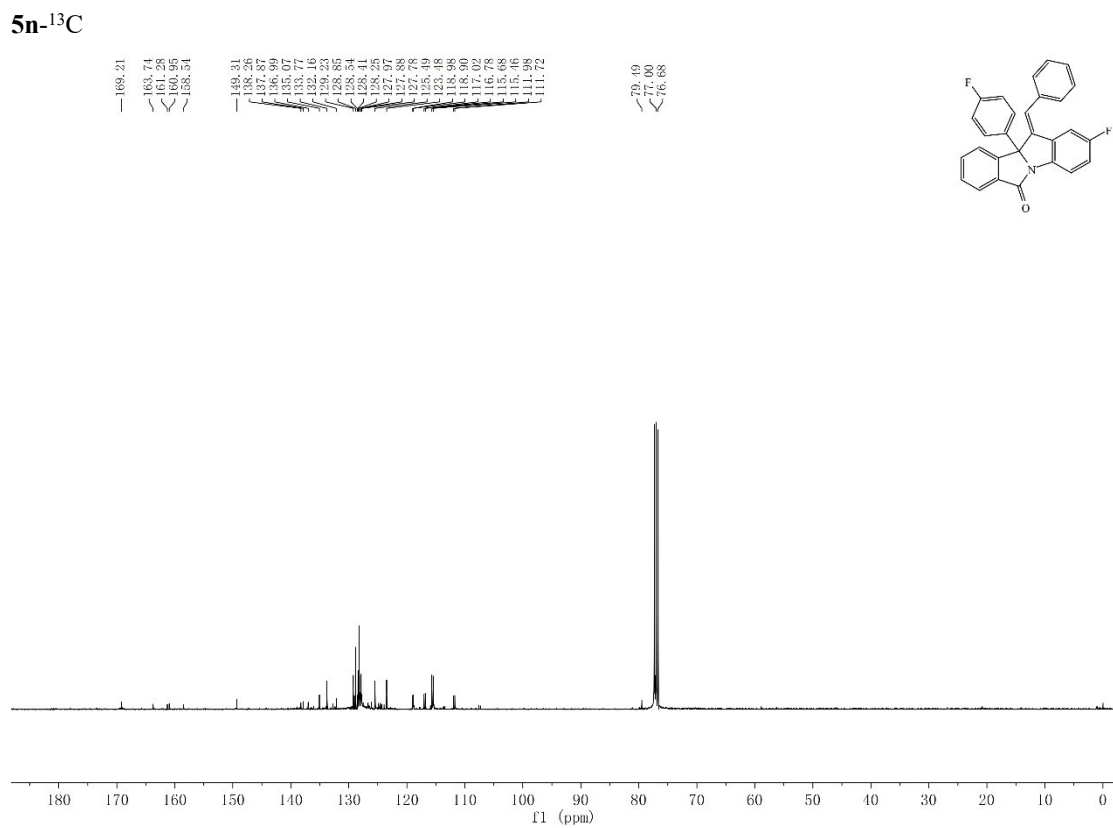

**6a-<sup>1</sup>H**

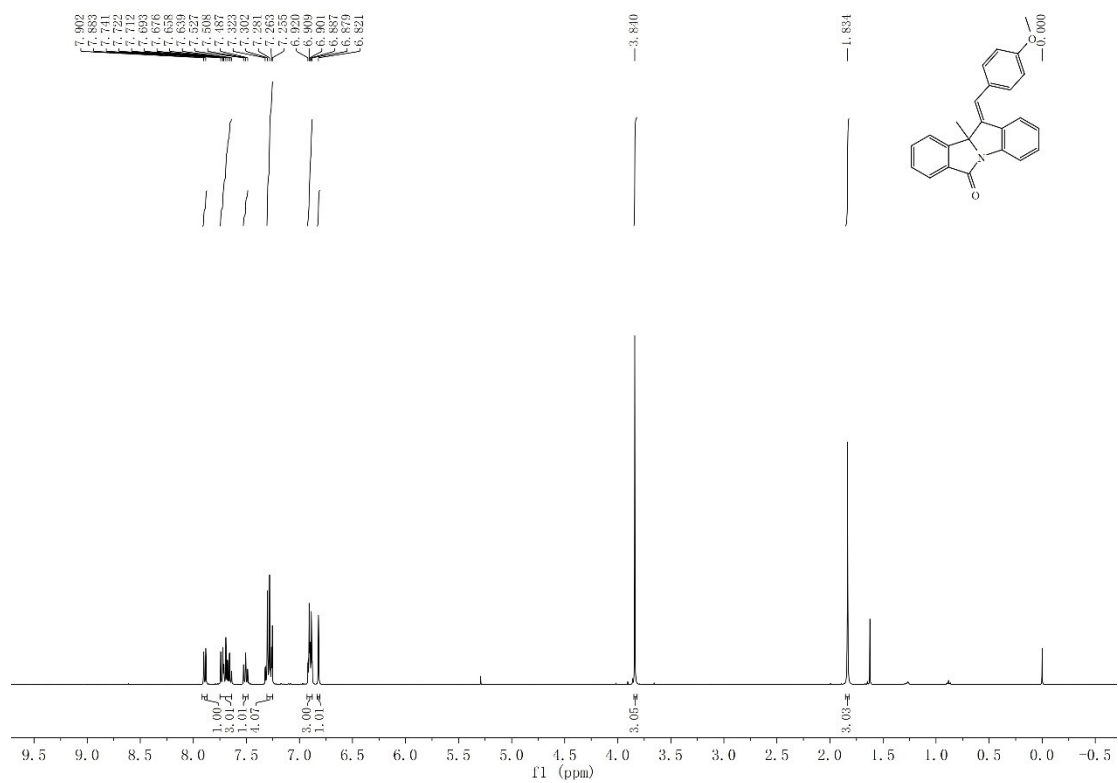

**6a-<sup>13</sup>C**

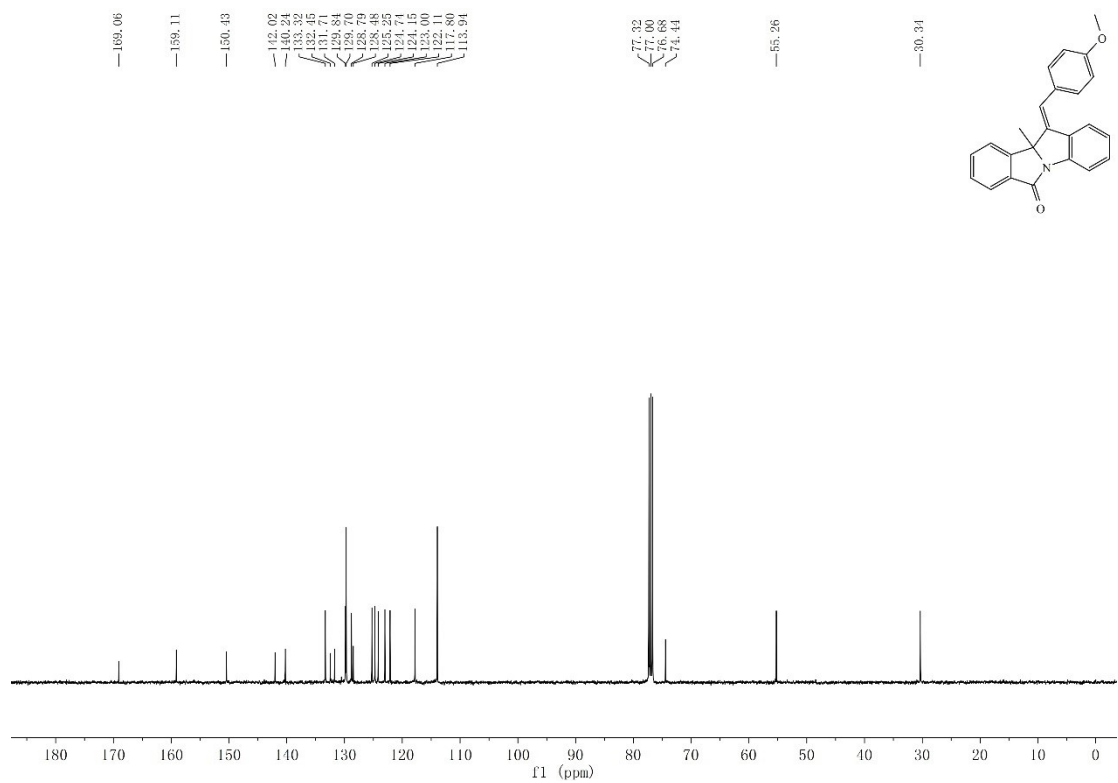

**6b-<sup>1</sup>H**

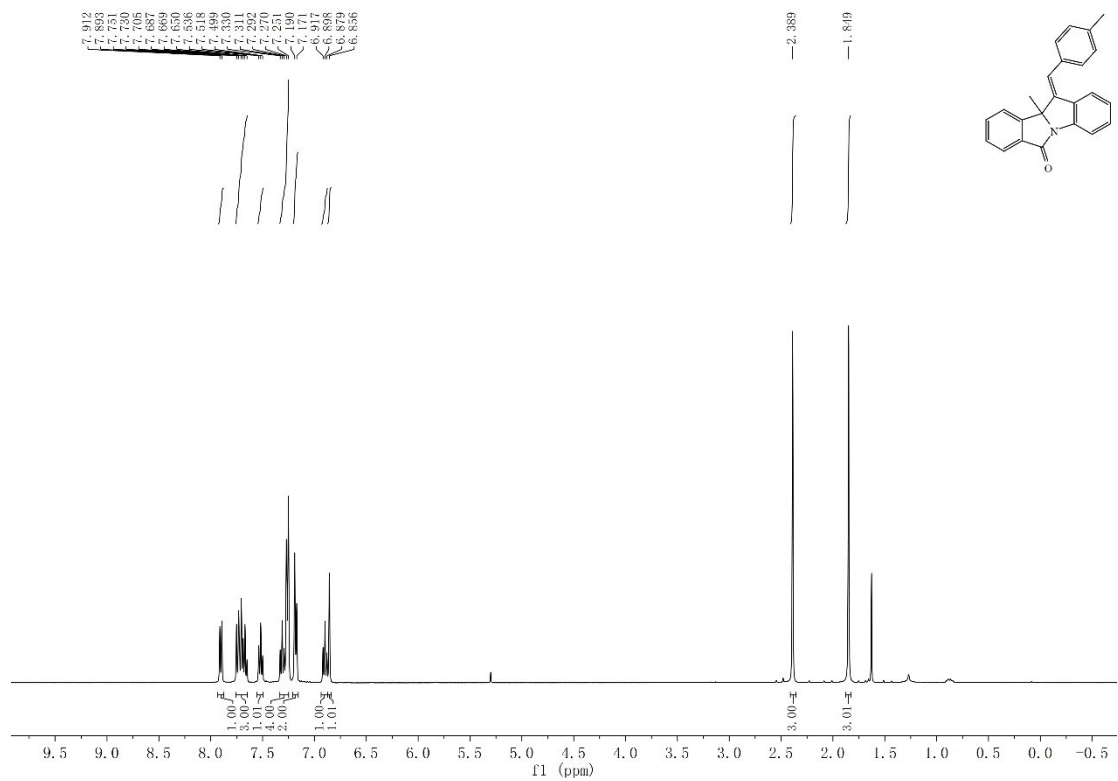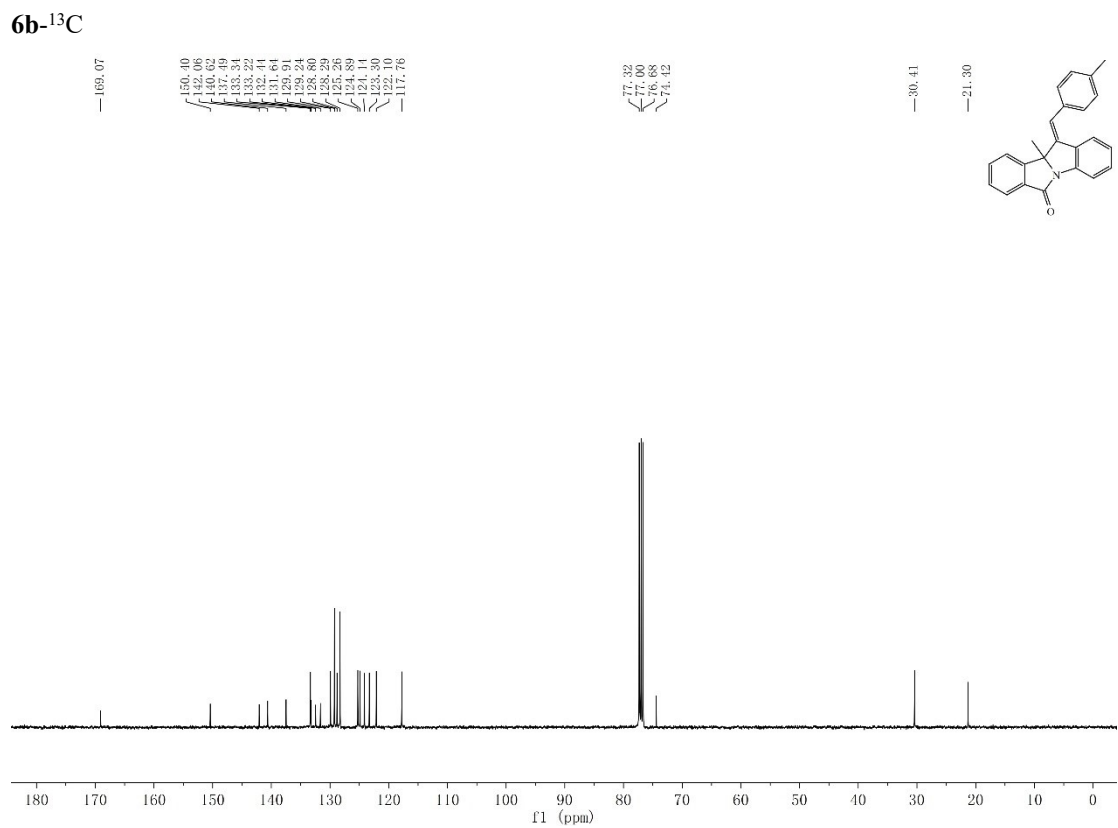

**6c-<sup>1</sup>H**

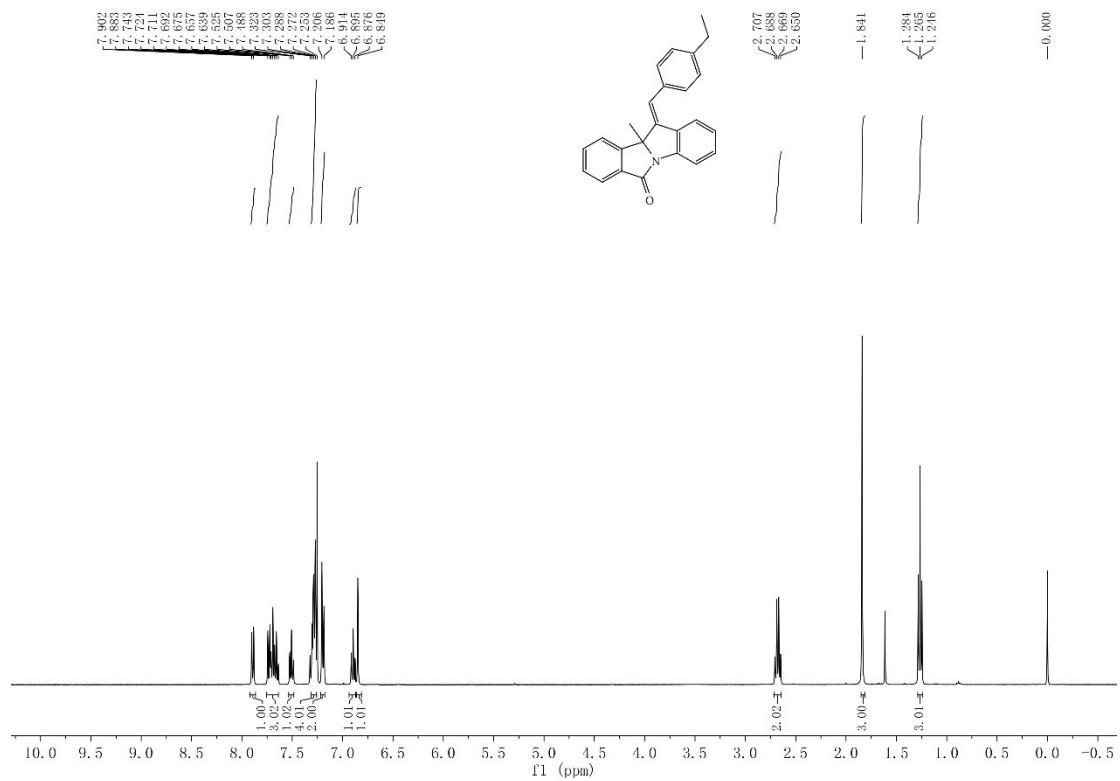

**6c-<sup>13</sup>C**

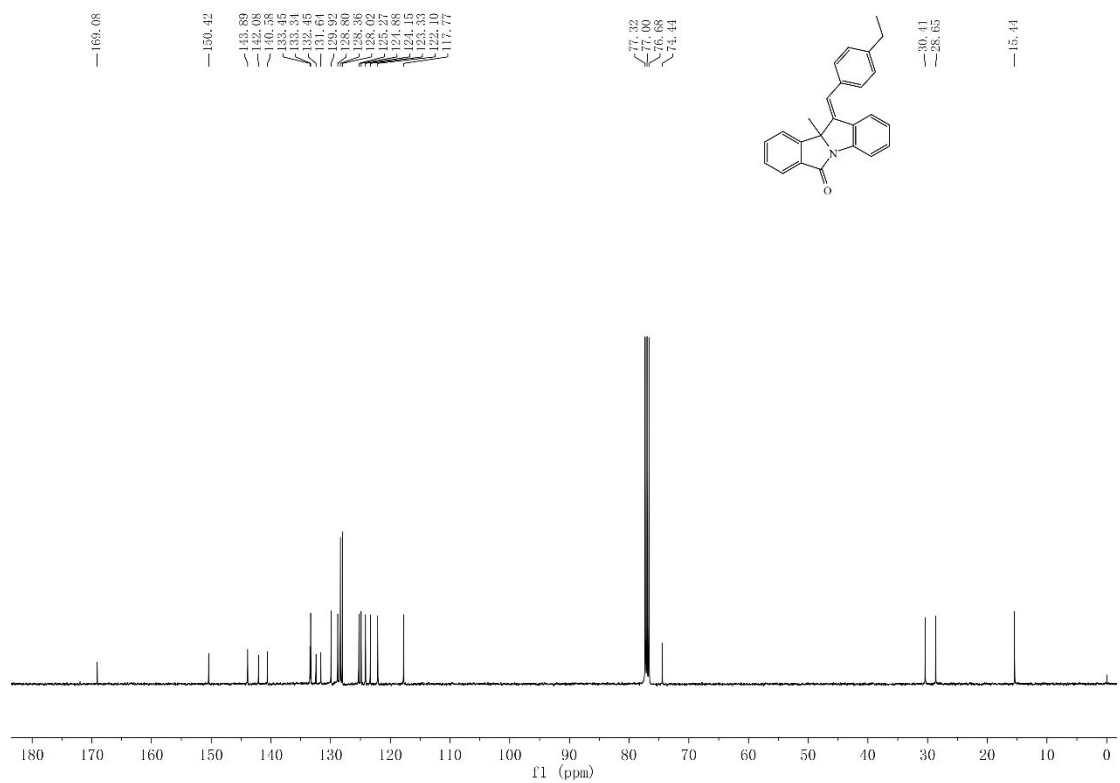

**6d-<sup>1</sup>H**

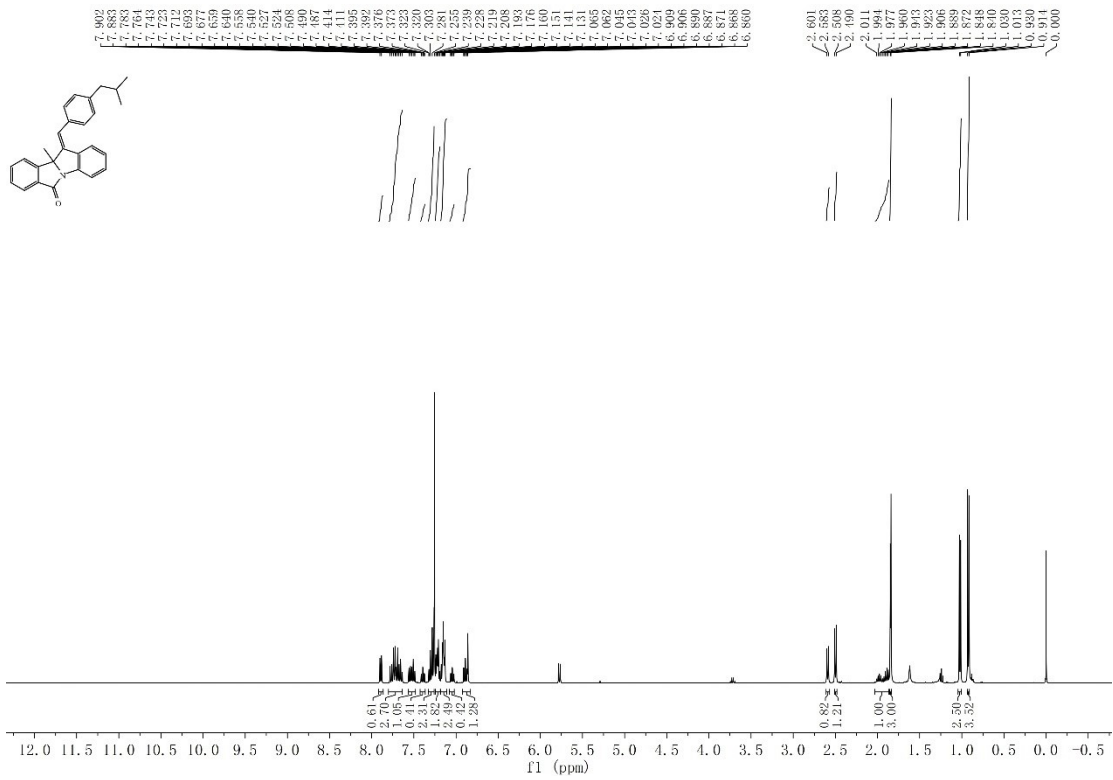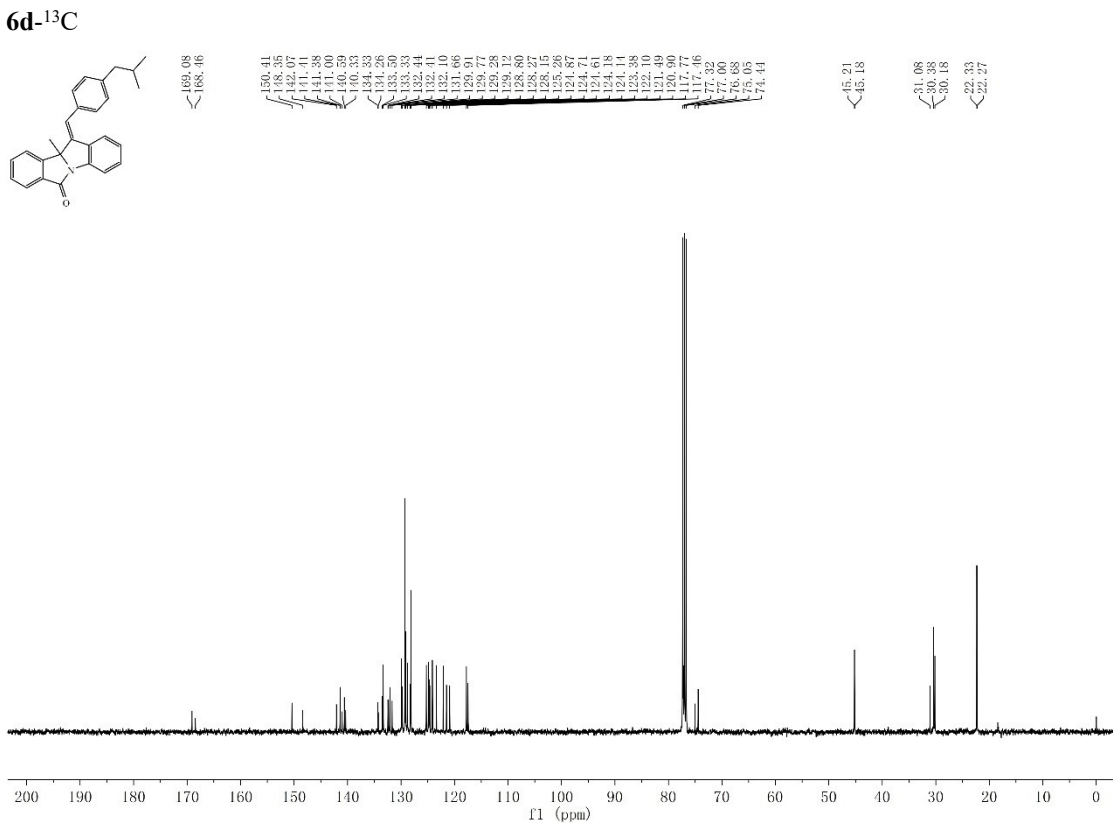

**6e-<sup>1</sup>H**

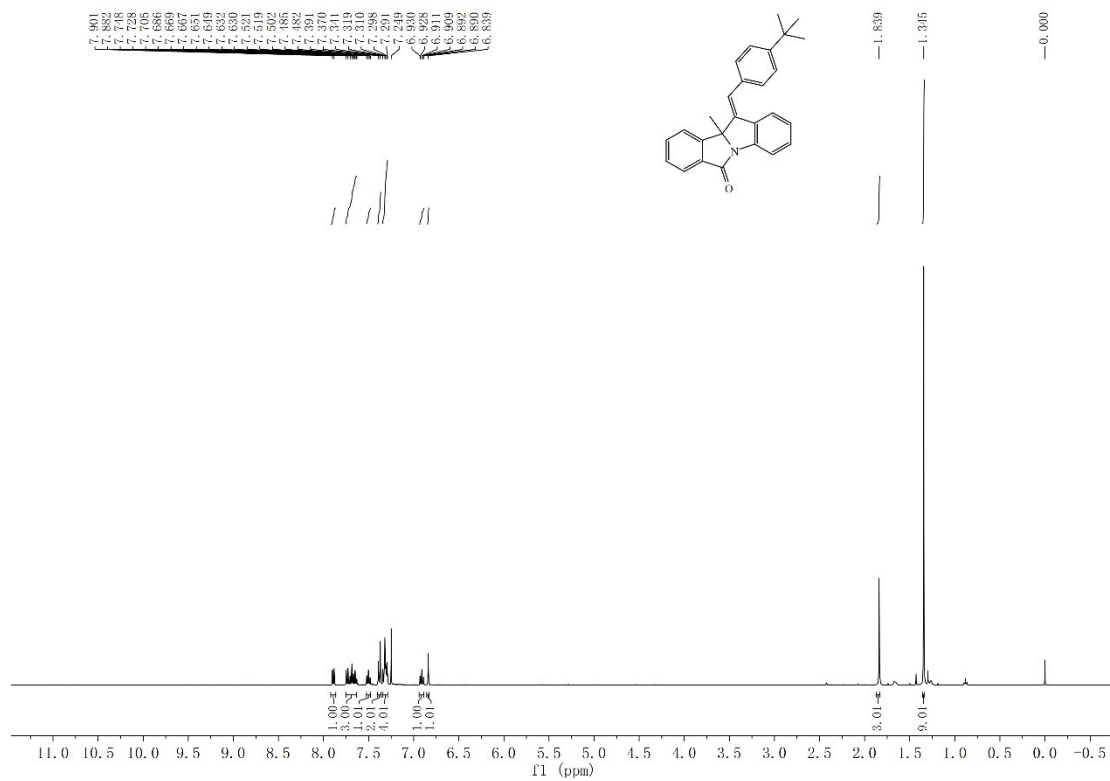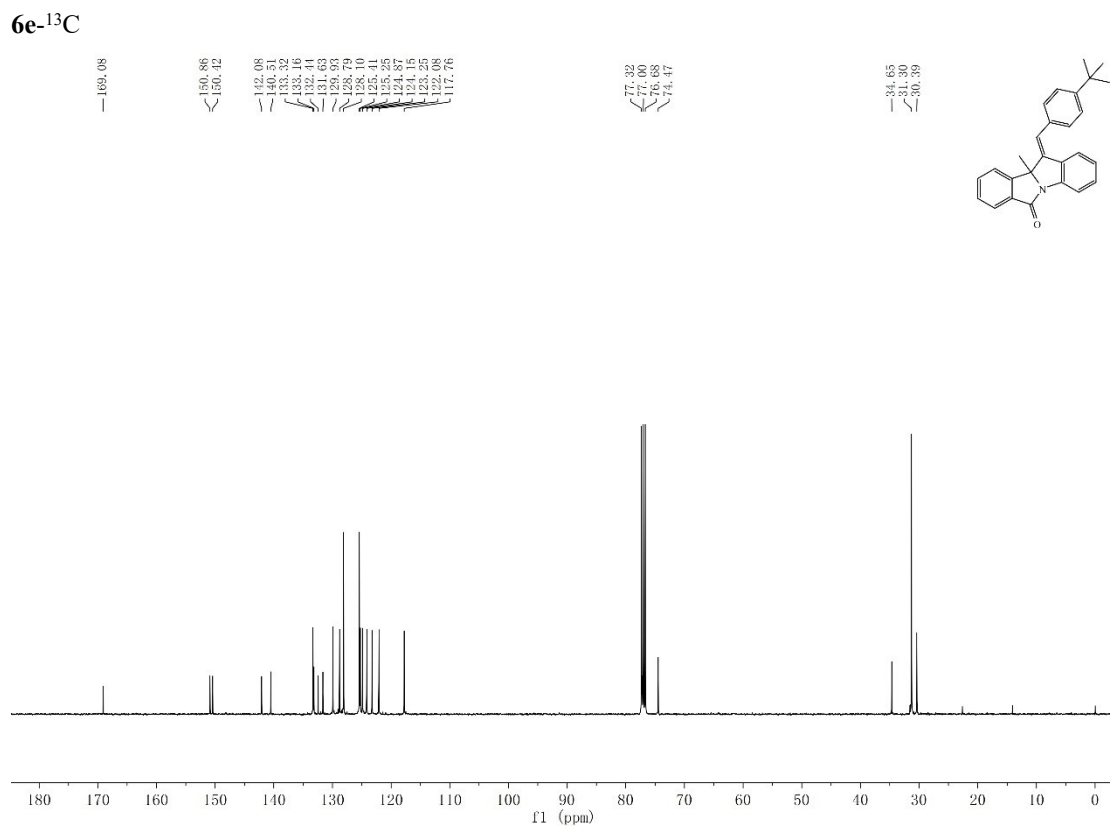

**6f-<sup>1</sup>H**

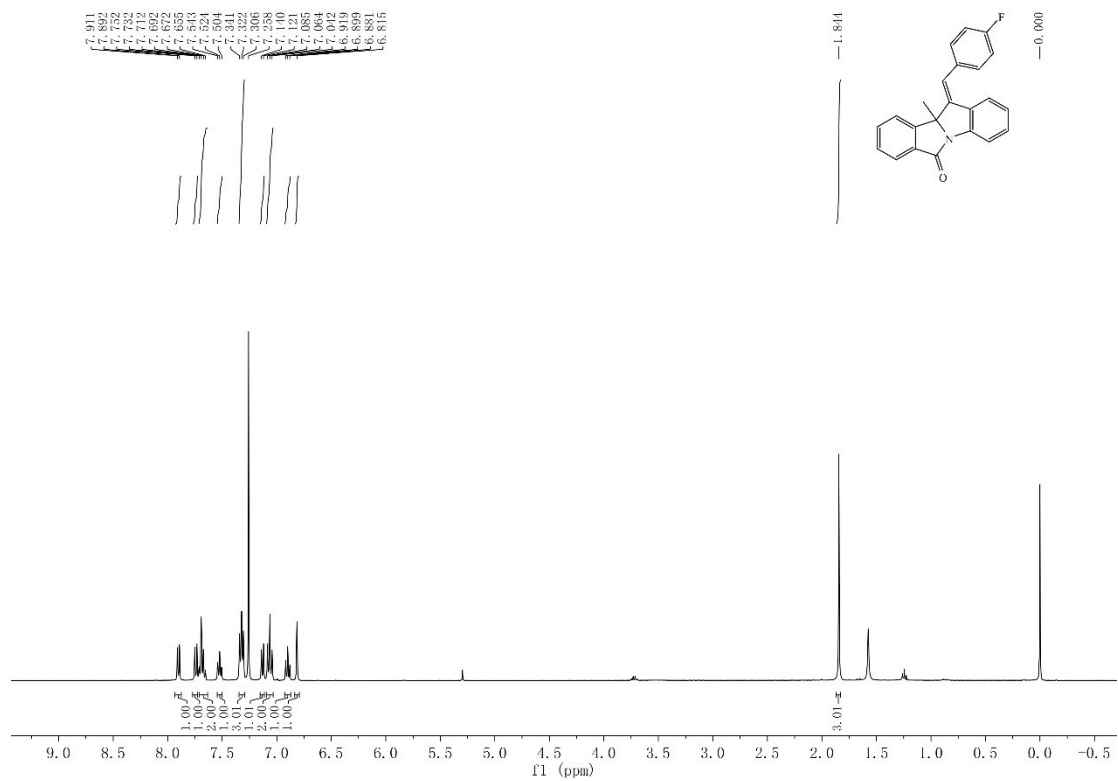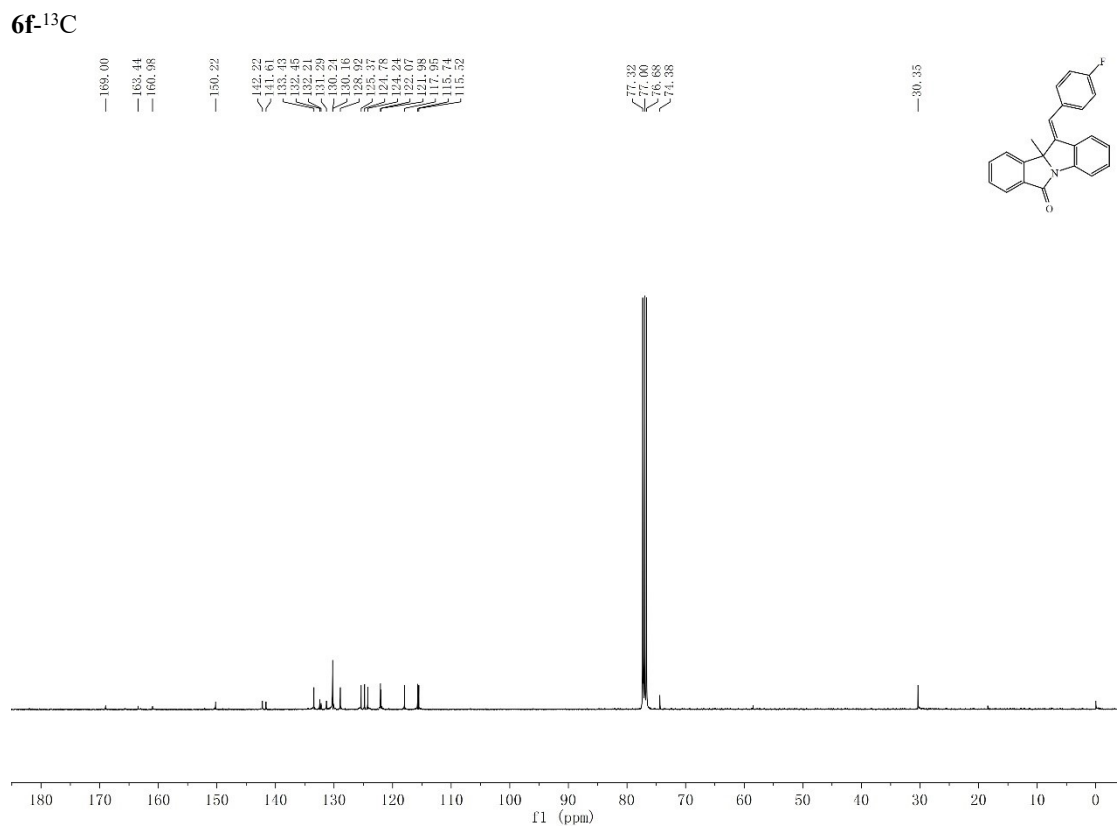

**6g-<sup>1</sup>H**

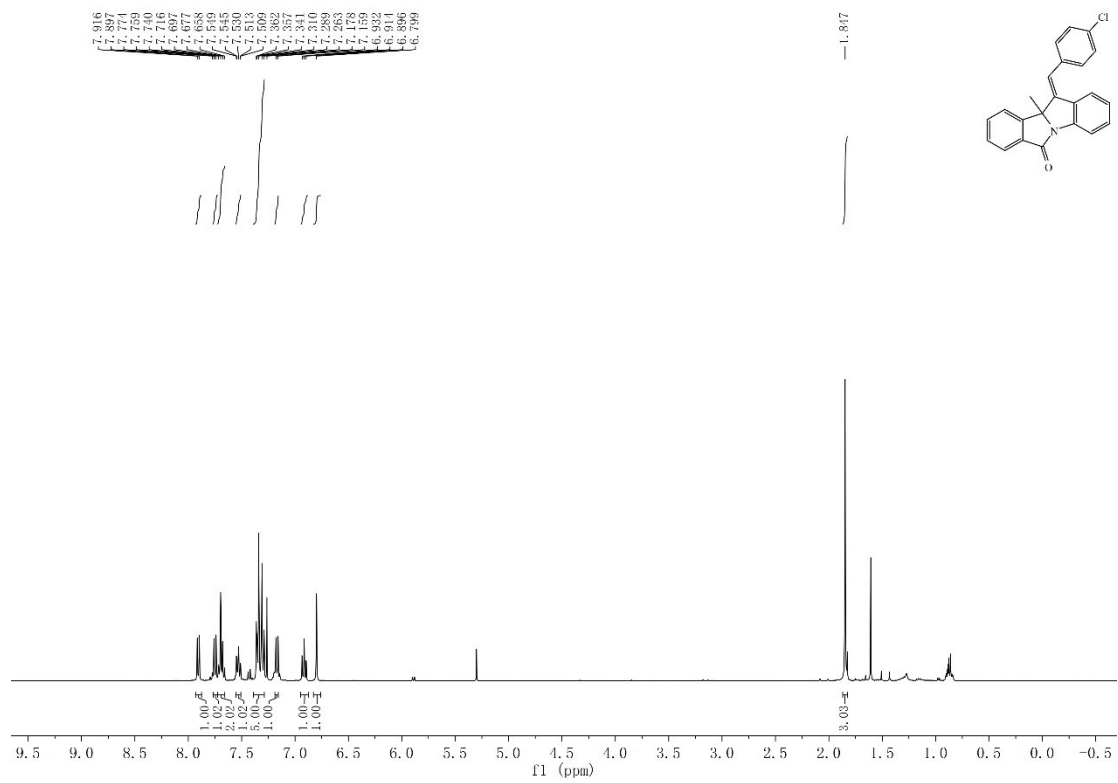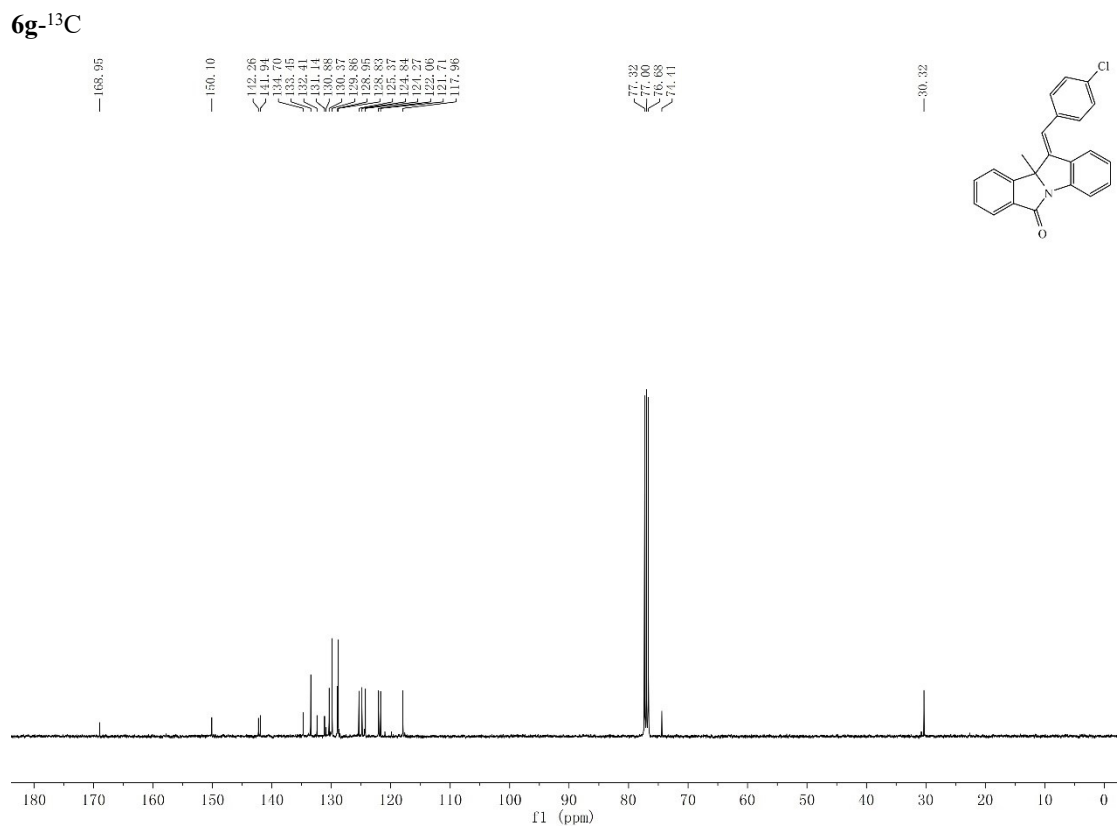

**6h-<sup>1</sup>H**



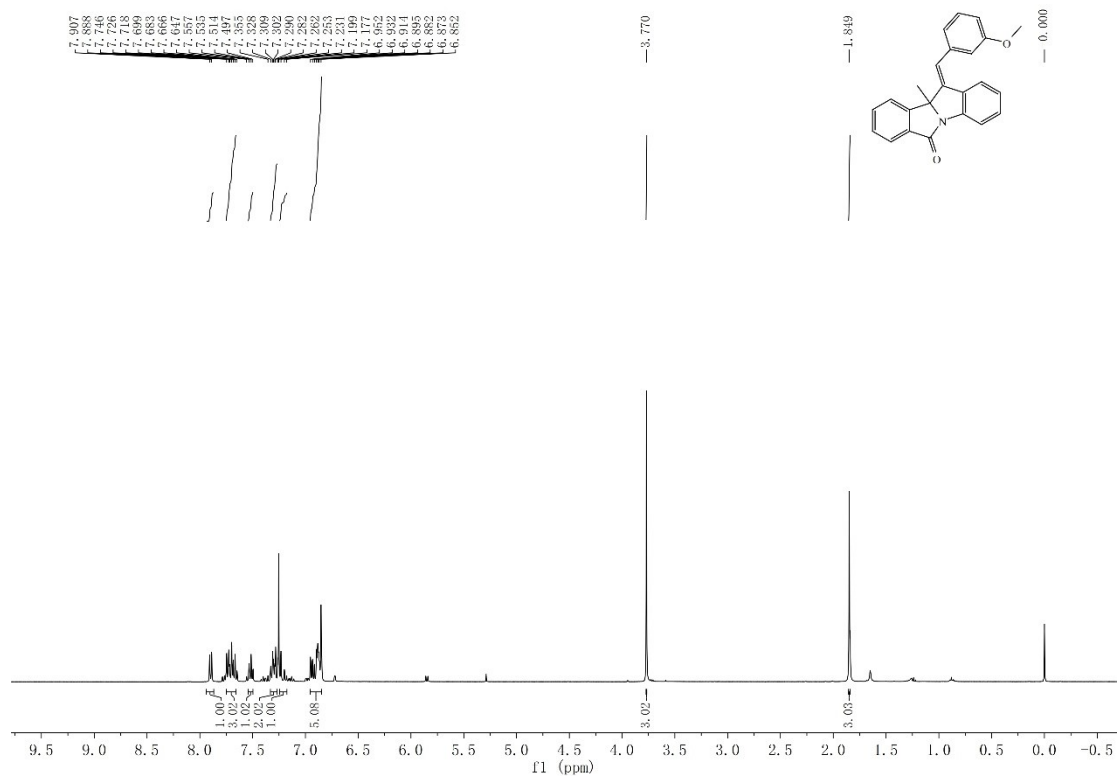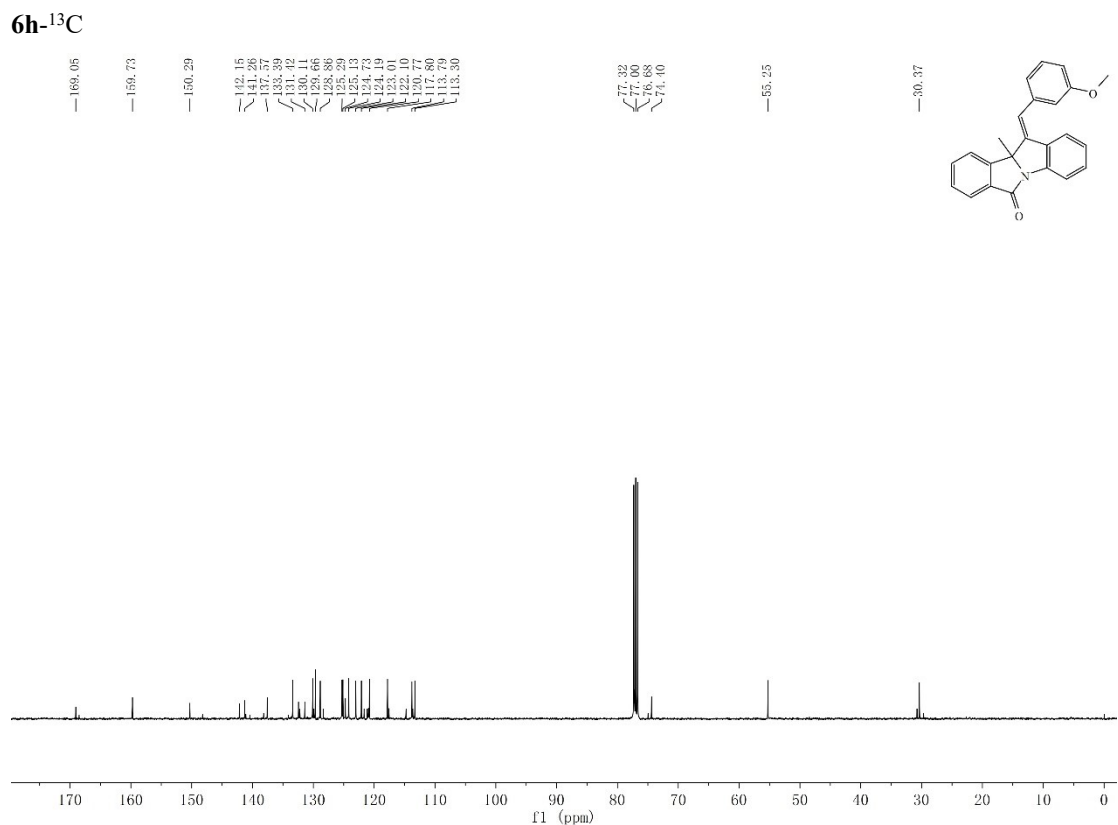

**6i-<sup>1</sup>H**

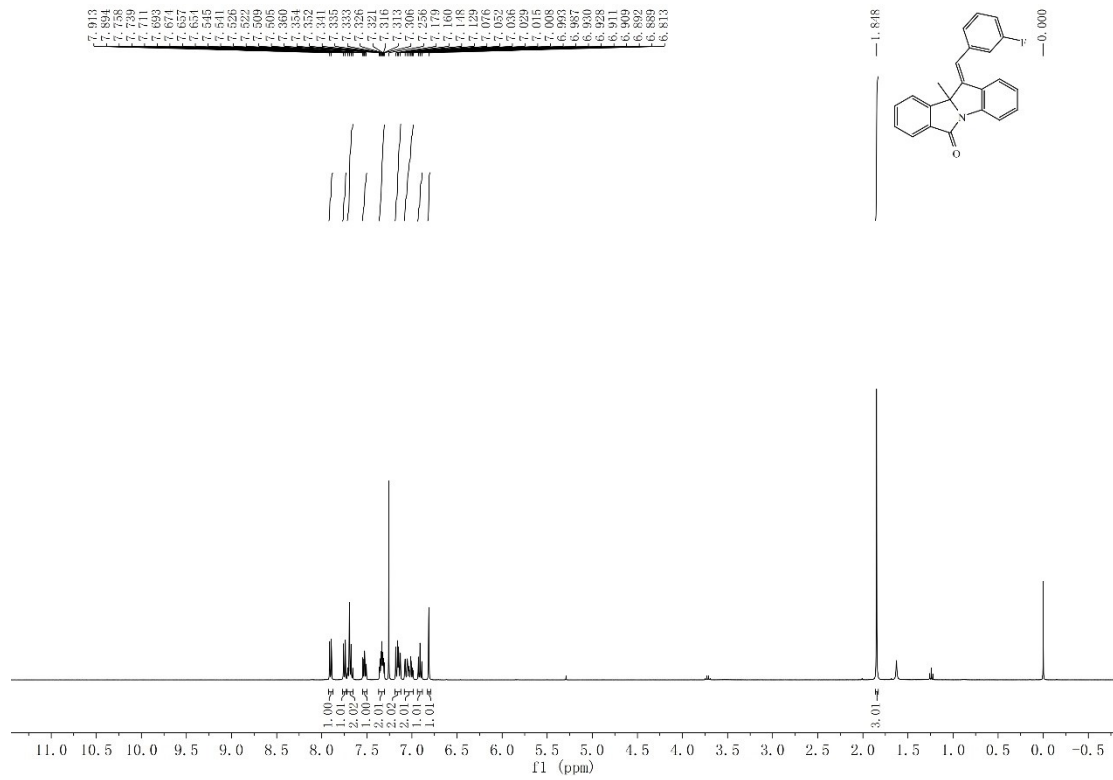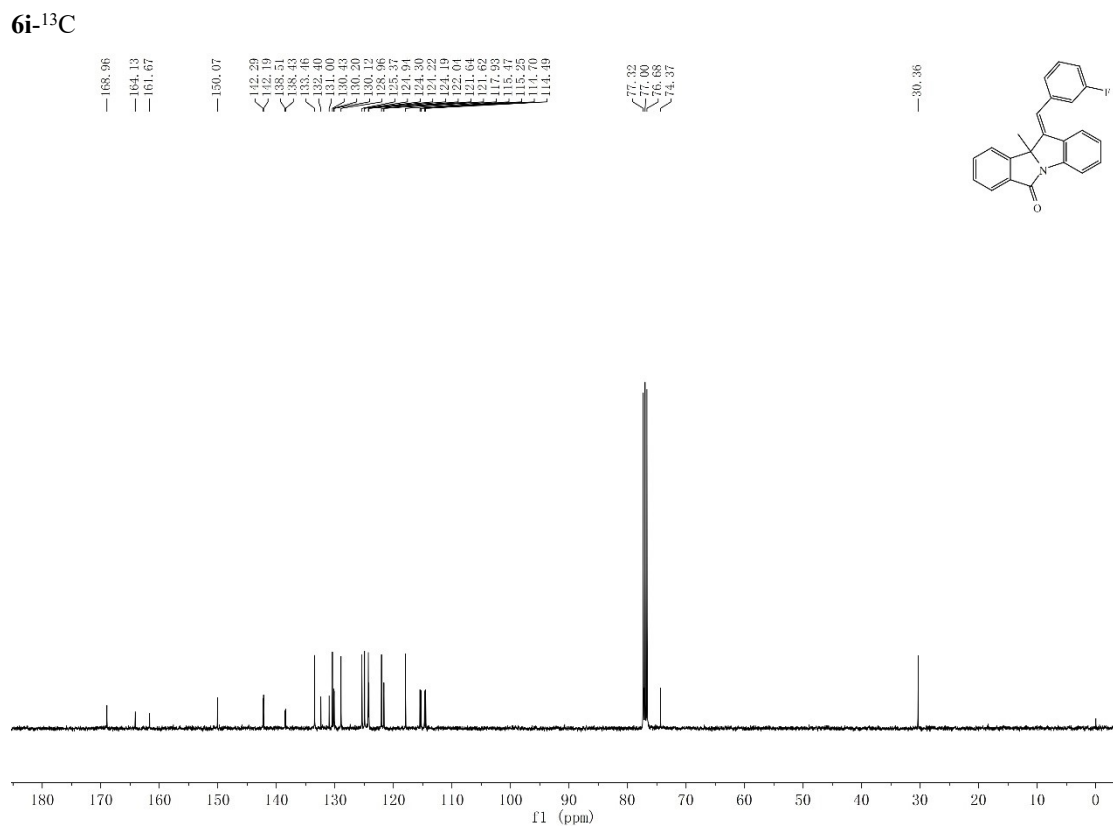

**6j-<sup>1</sup>H**

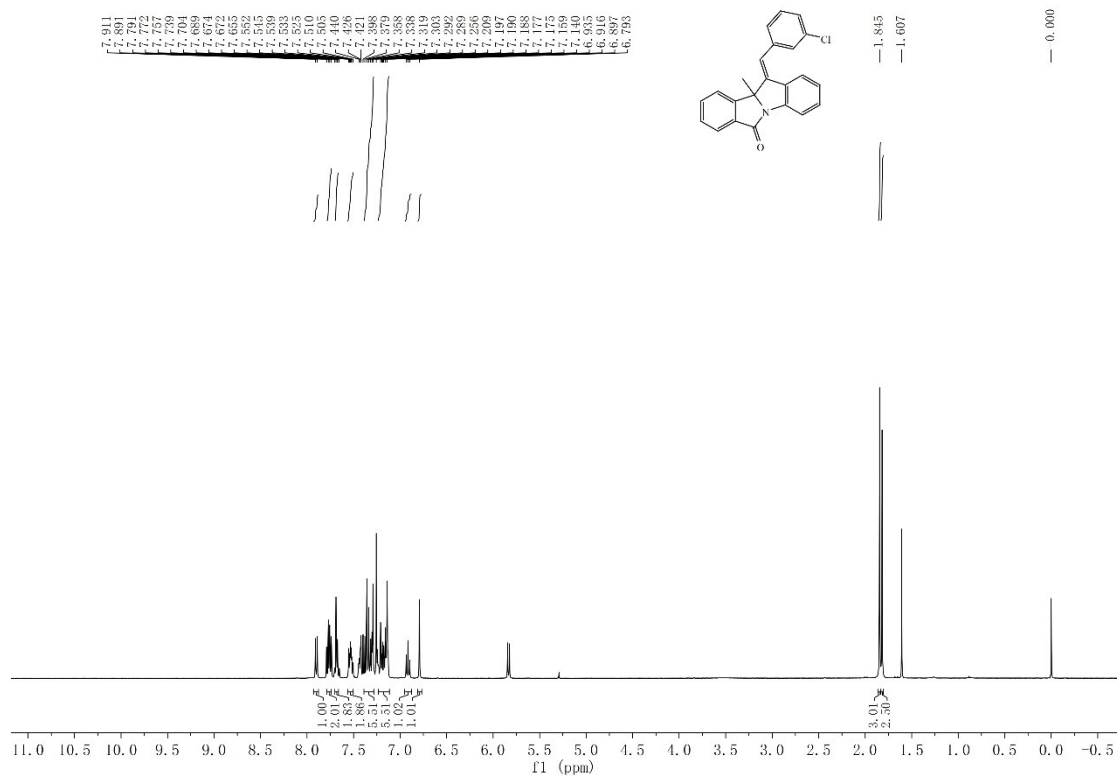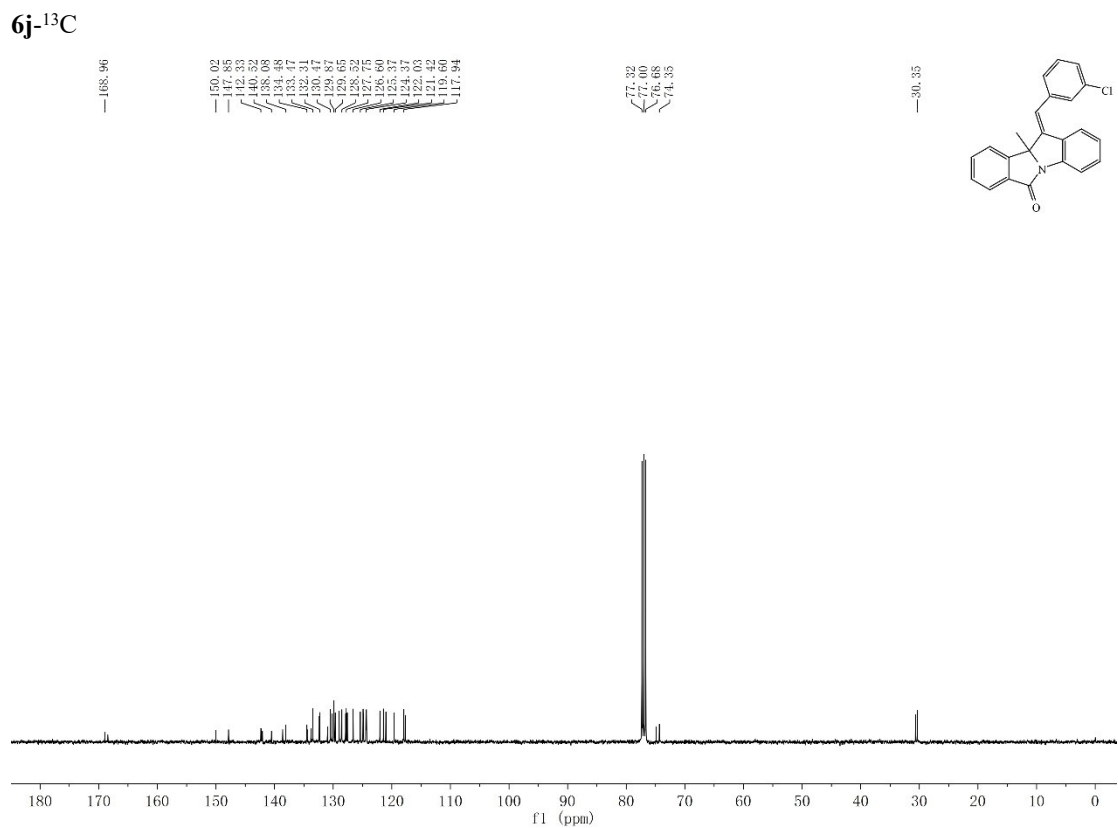

**6l-<sup>1</sup>H**

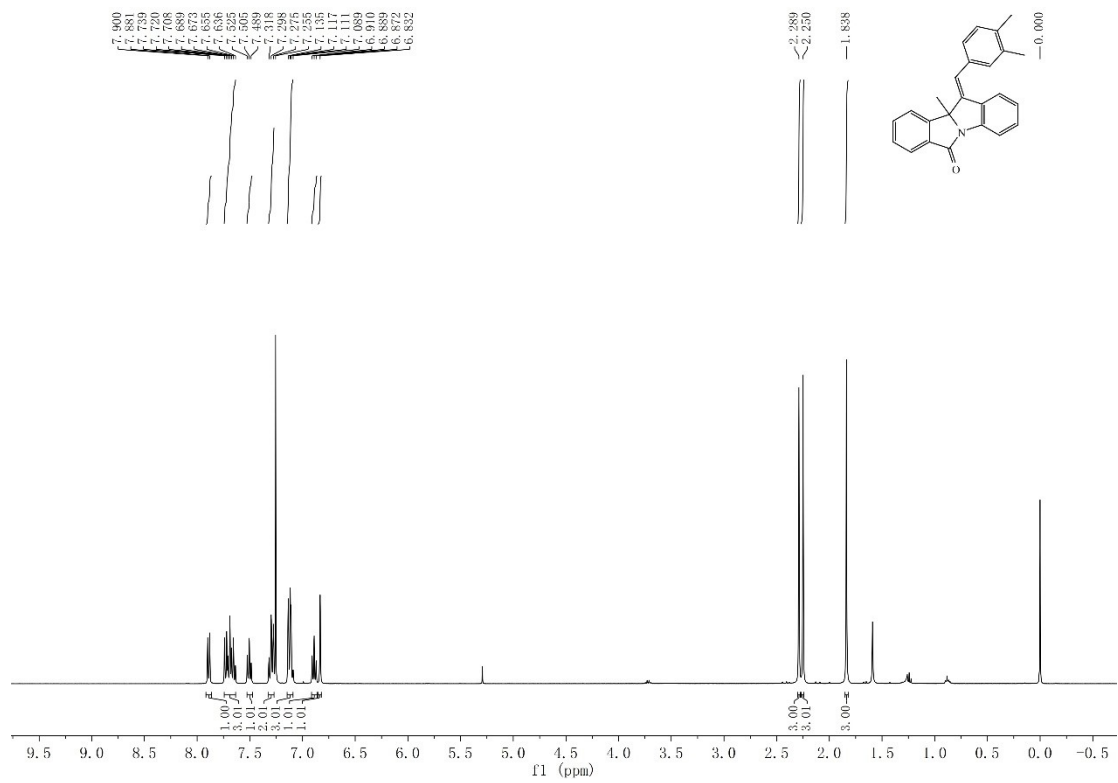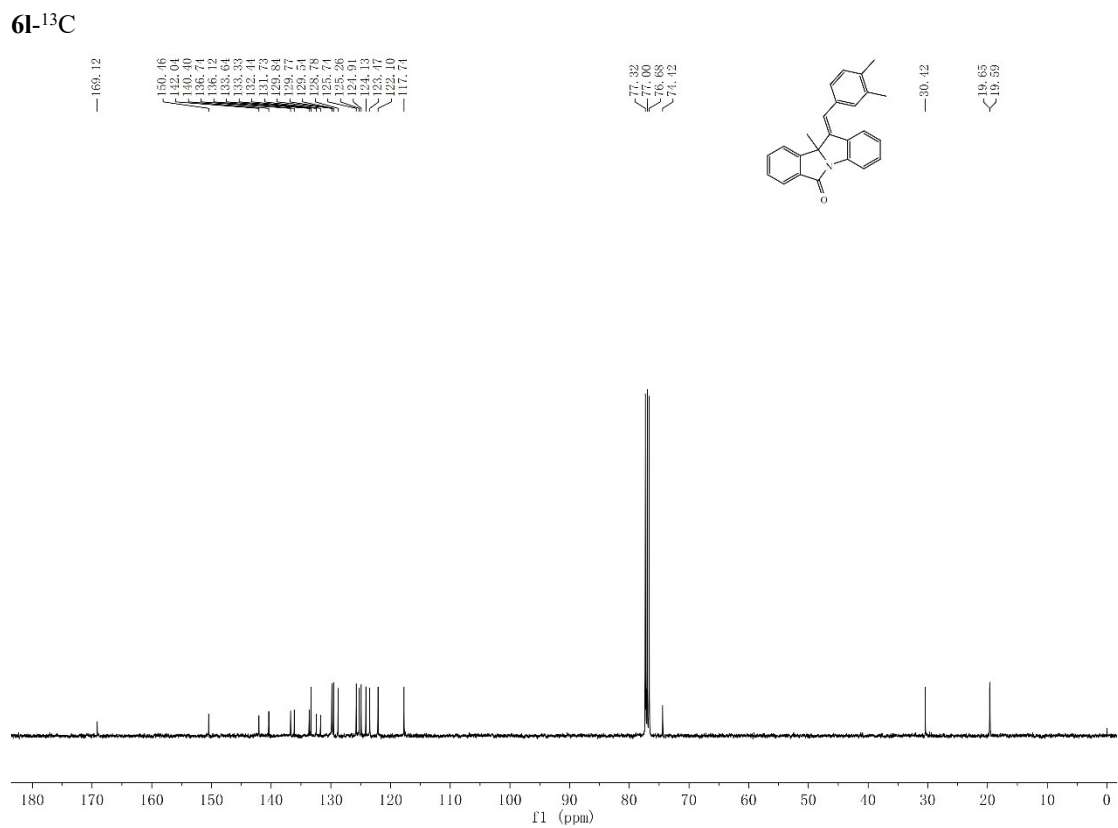

**6m-<sup>1</sup>H**

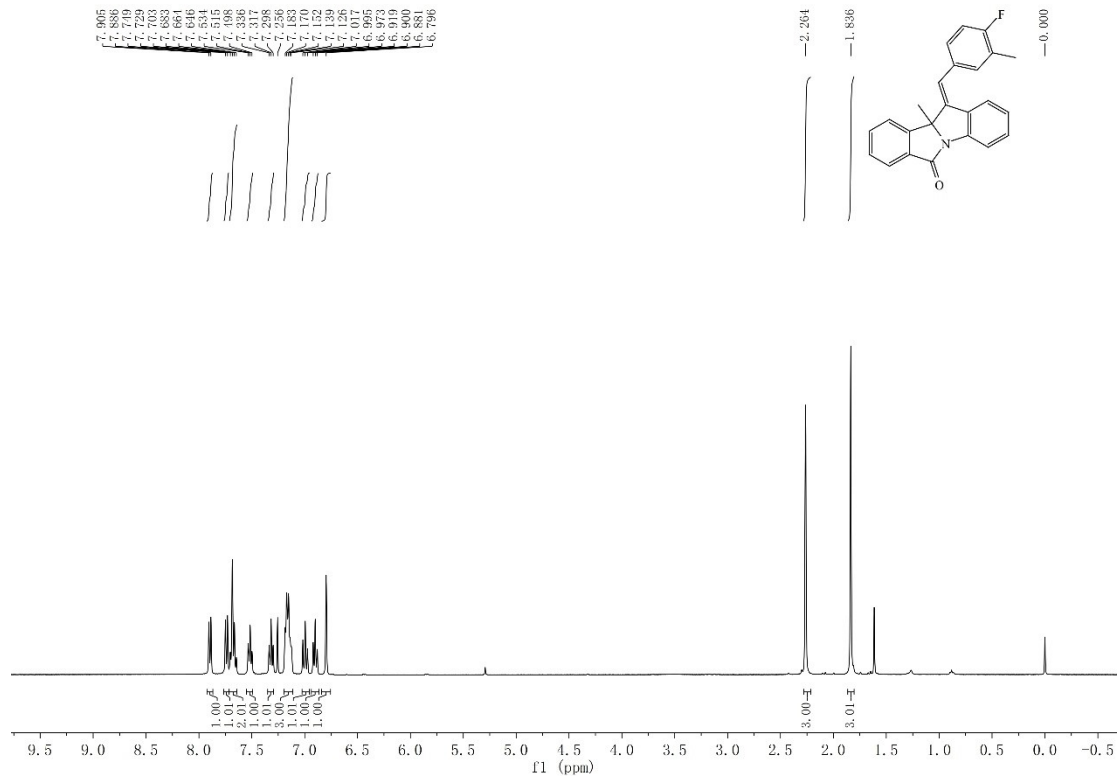

**6m-<sup>13</sup>C**

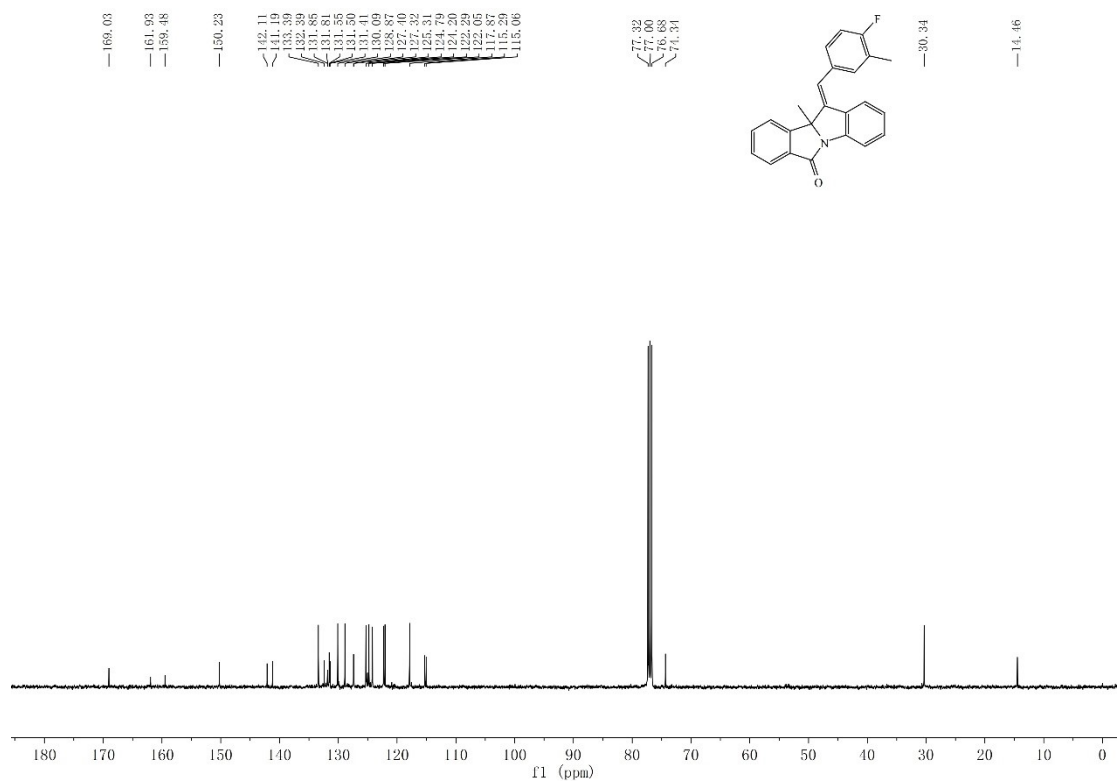

**6n-<sup>1</sup>H**

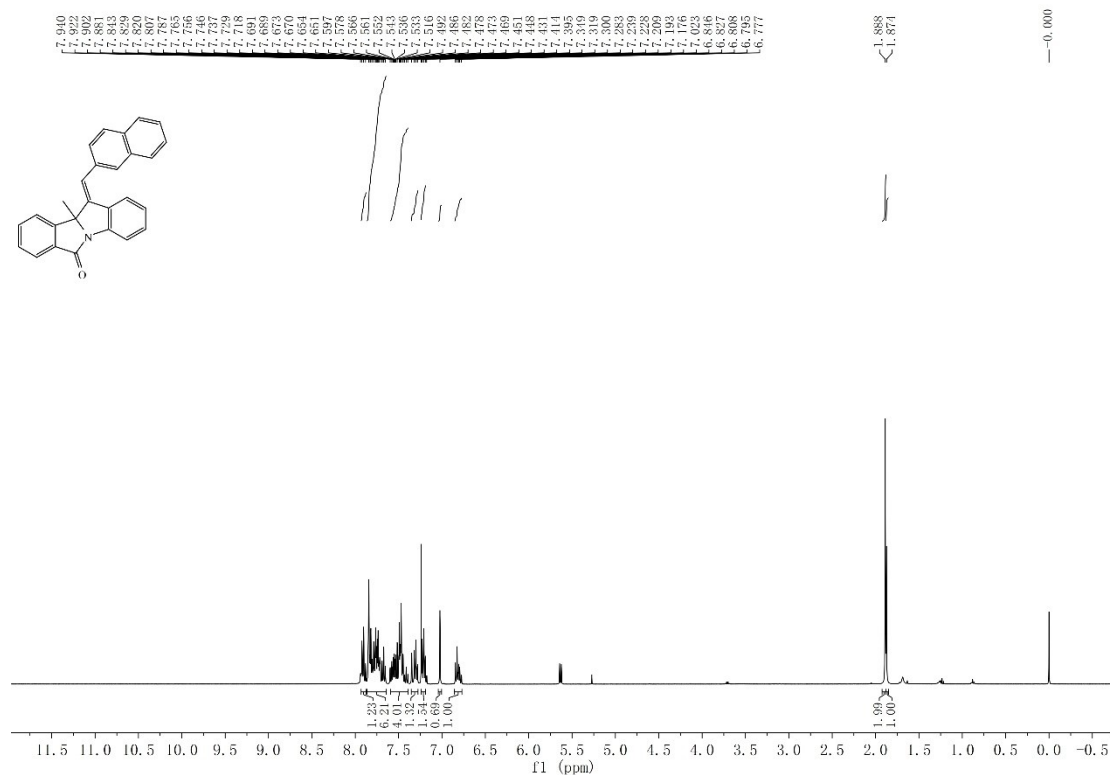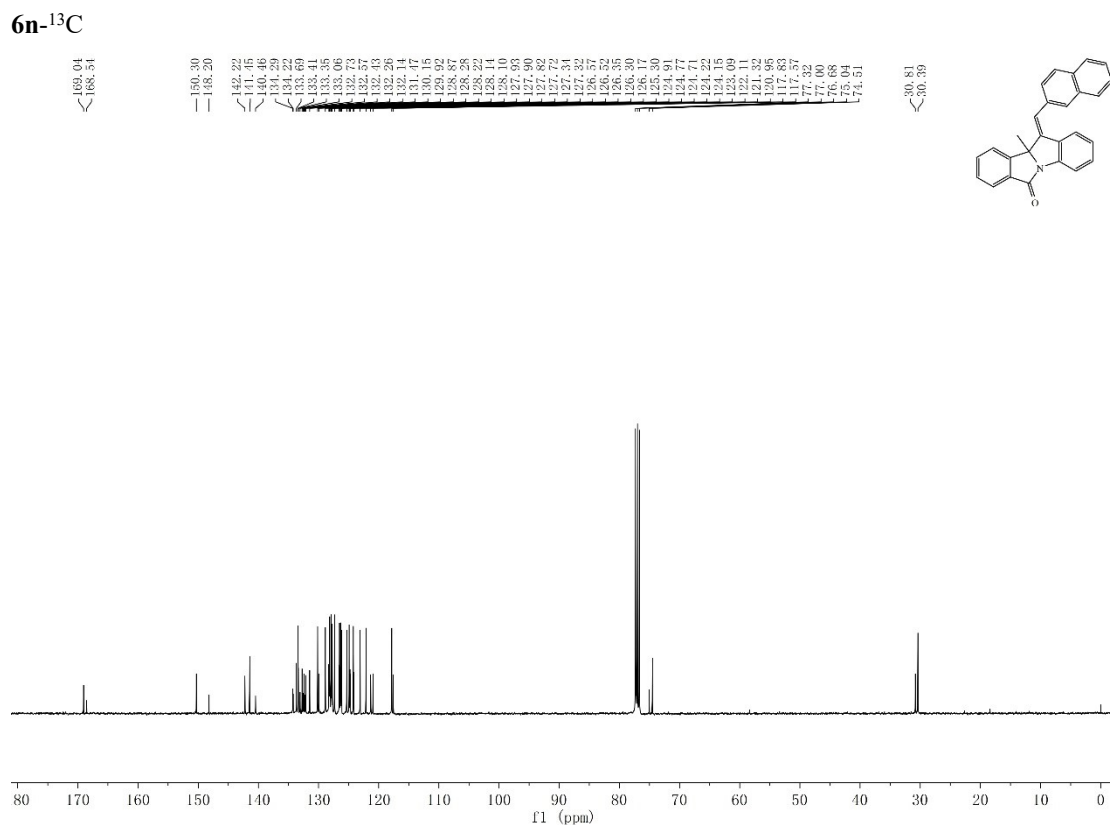

**6n-<sup>1</sup>H**

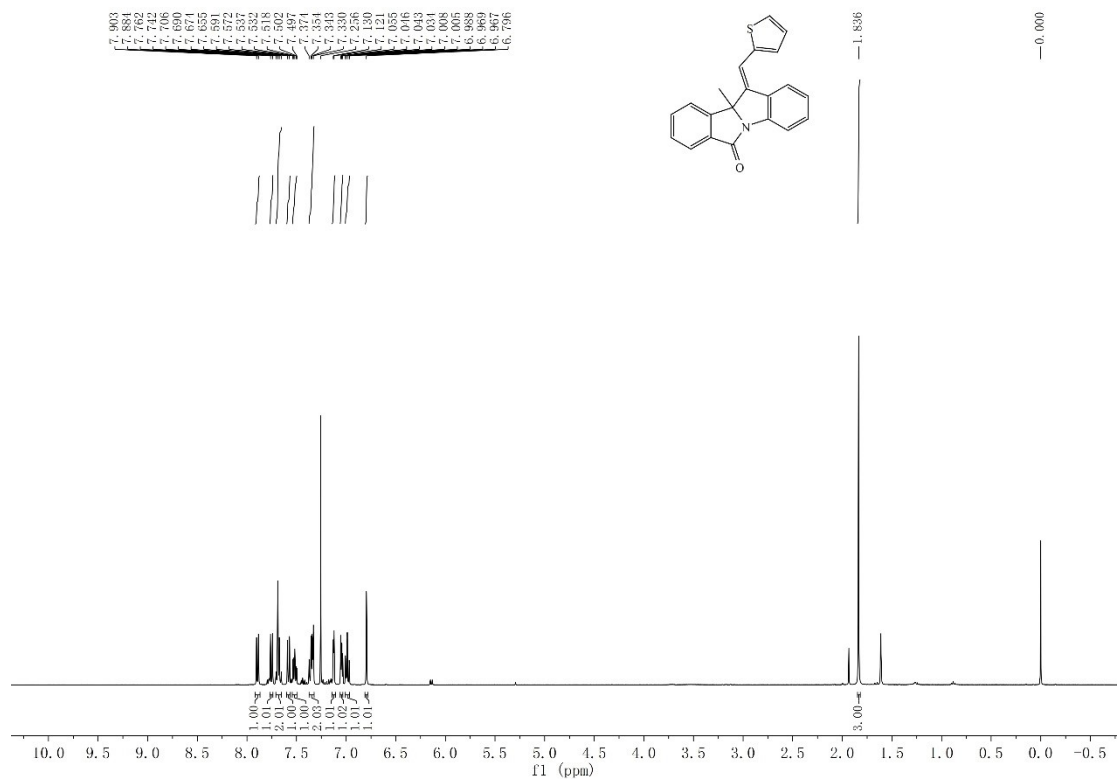

**60-<sup>13</sup>C**

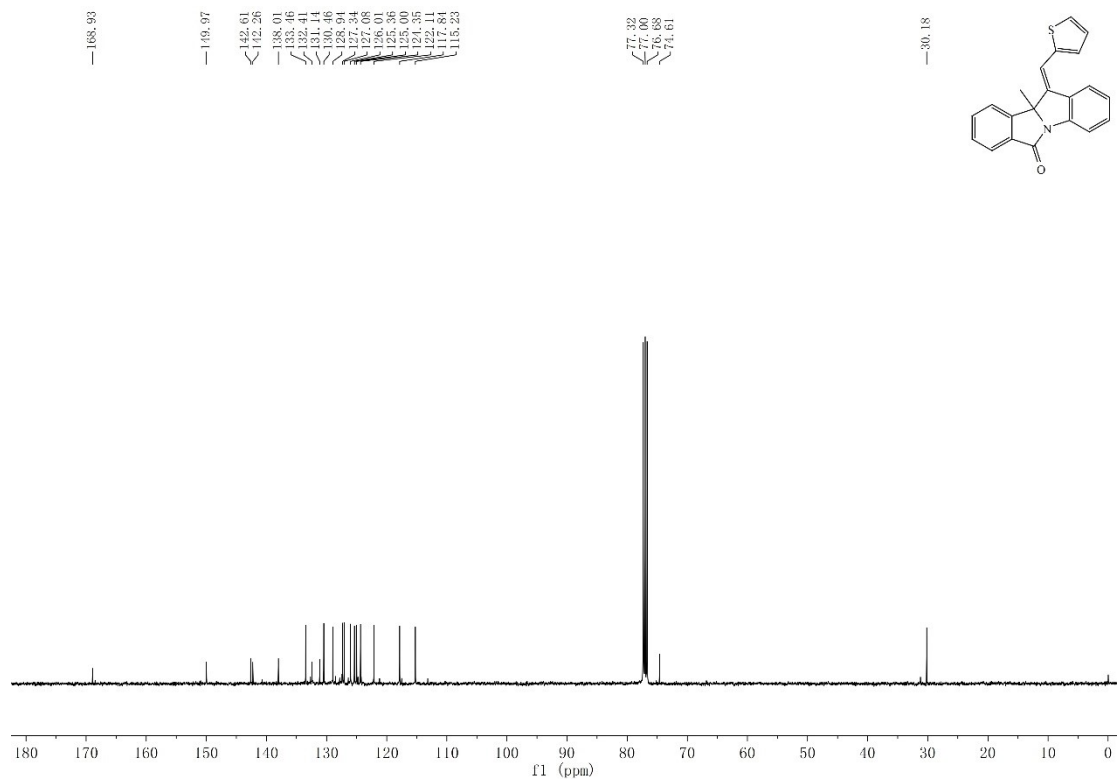

**7-<sup>1</sup>H**

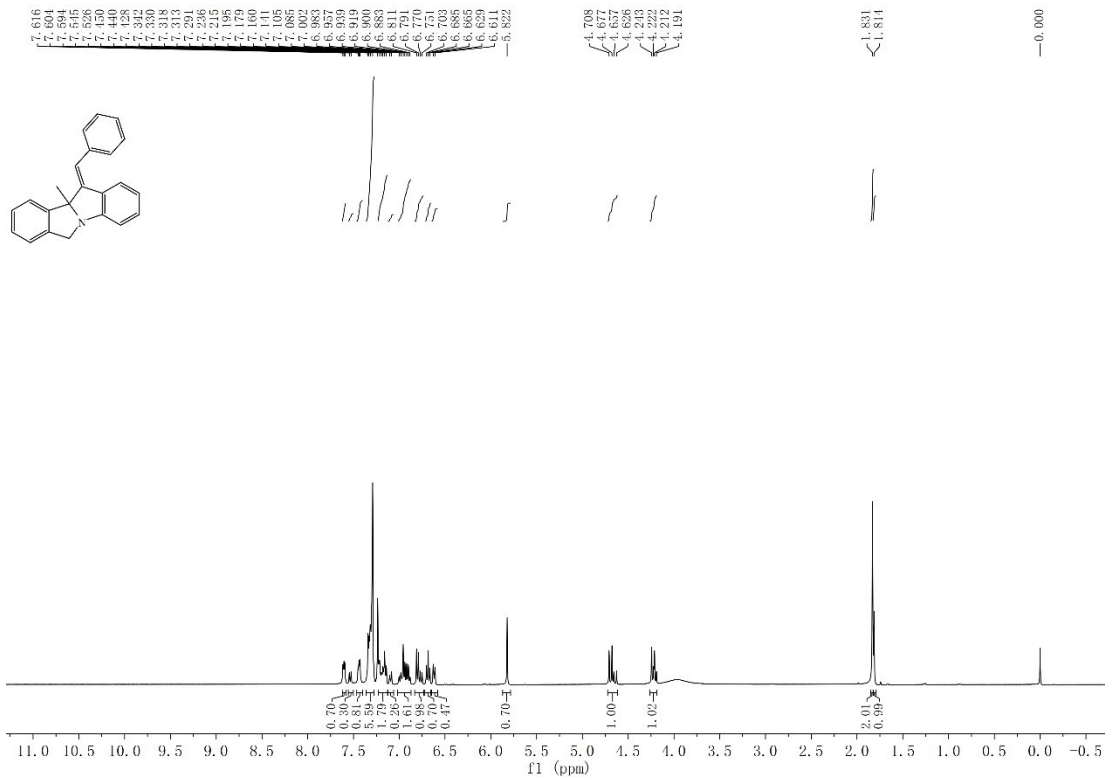

**7-<sup>13</sup>C**

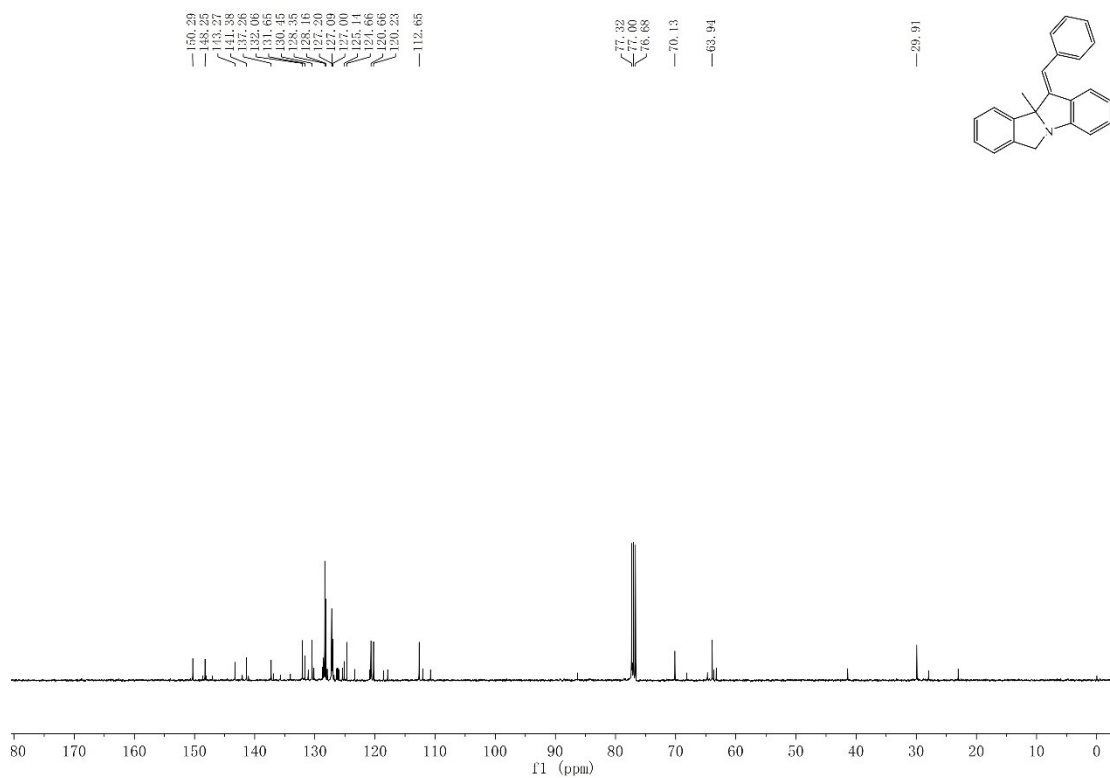

**8-<sup>1</sup>H**



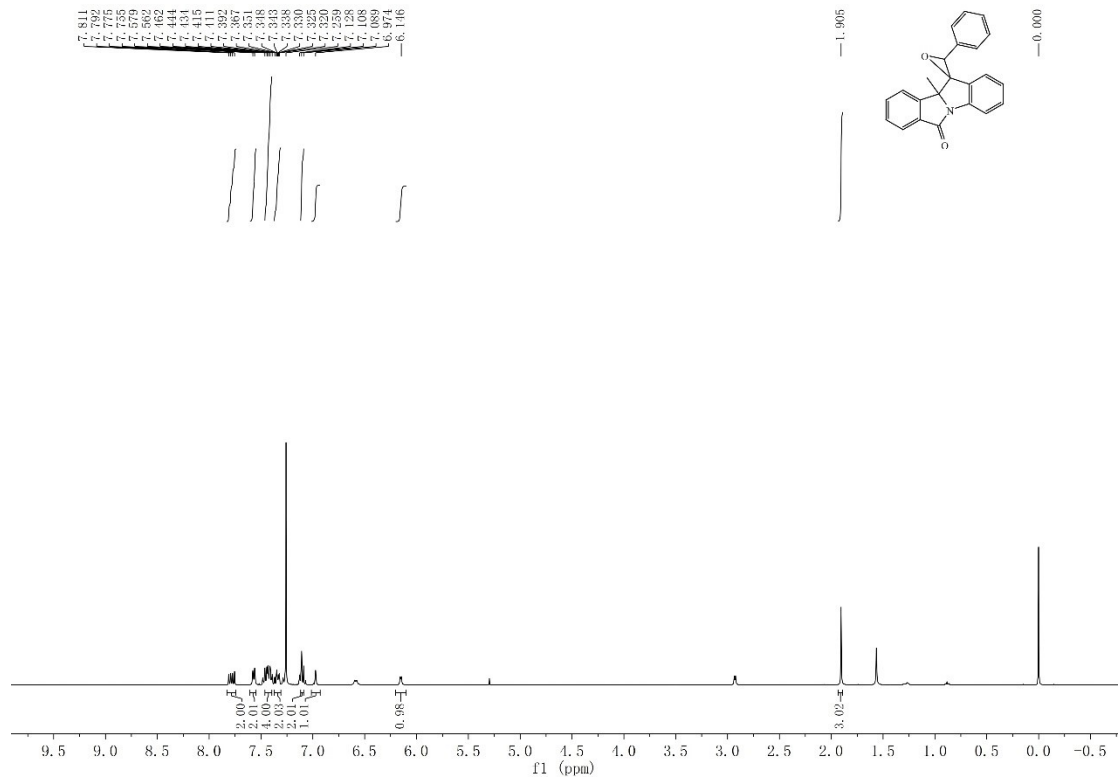

**8**- $^{13}\text{C}$

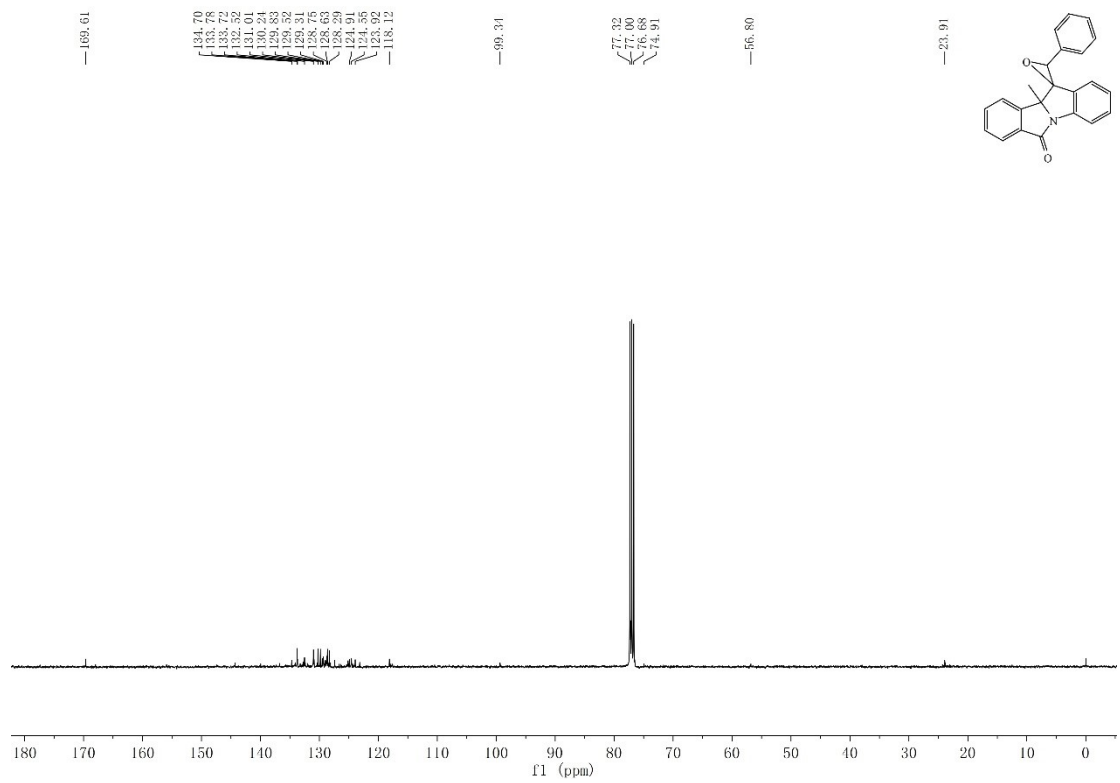

**9**- $^1\text{H}$

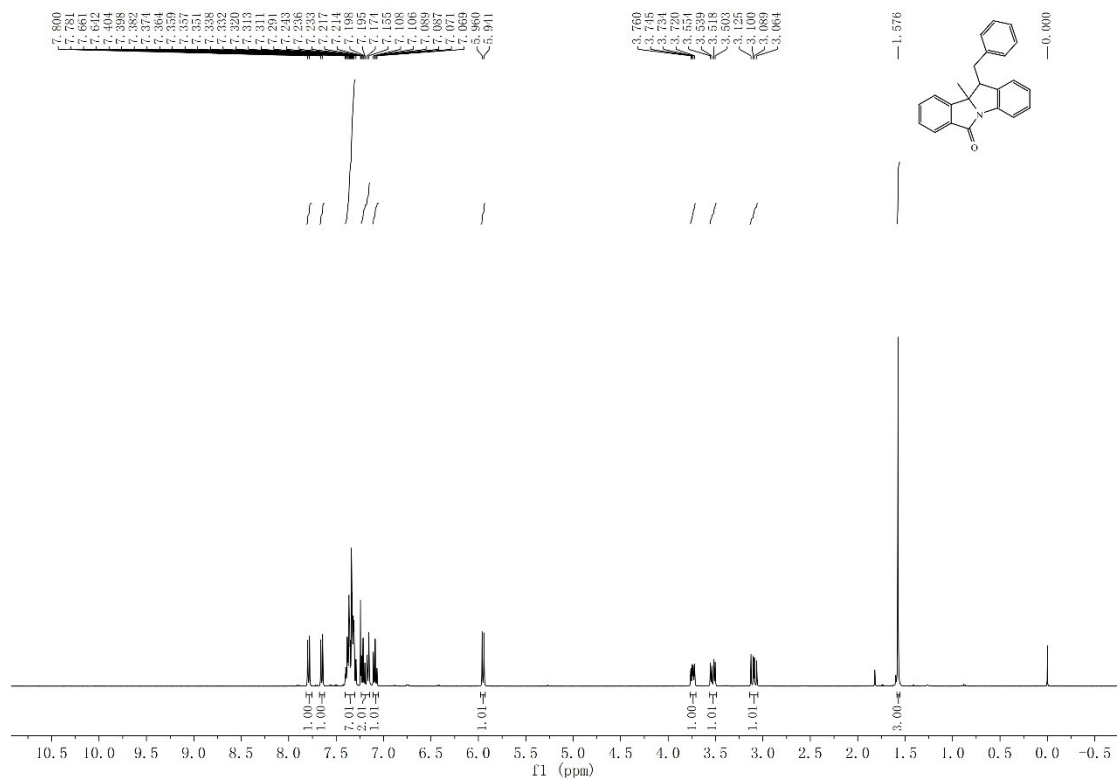

**9**-<sup>13</sup>C

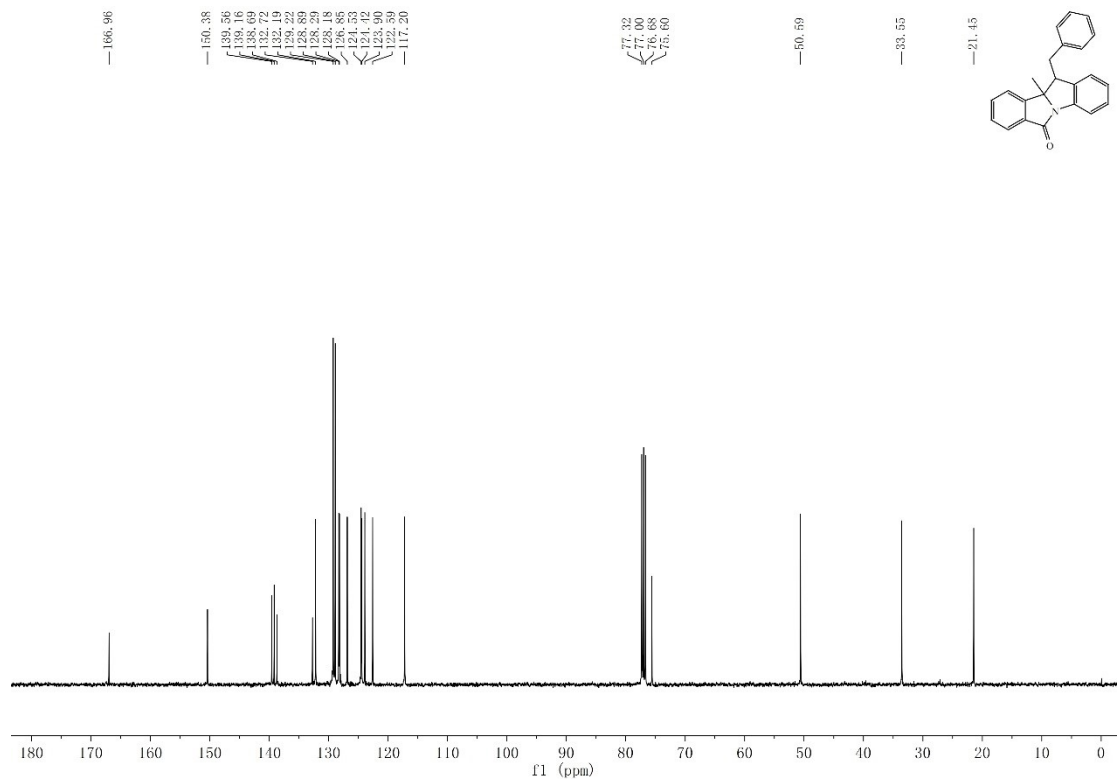



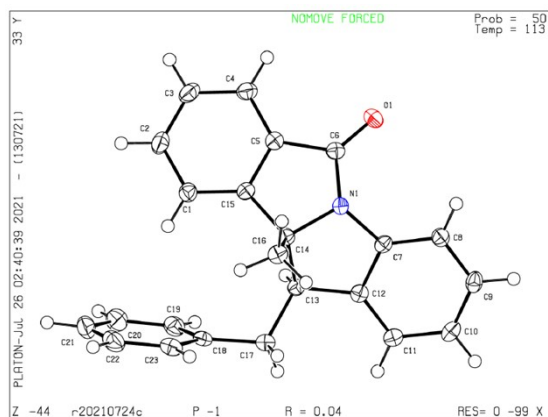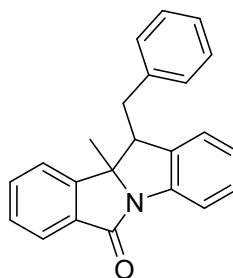

9

Bond precision: C-C = 0.0017 Å

Wavelength=0.71073

Cell: a=8.6337(5) b=9.0522(5) c=11.8733(4)  
 alpha=76.152(4) beta=79.612(4) gamma=71.252(5)  
 Temperature: 113 K

|                        | Calculated                          | Reported                            |
|------------------------|-------------------------------------|-------------------------------------|
| Volume                 | 847.76(8)                           | 847.76(8)                           |
| Space group            | P -1                                | P -1                                |
| Hall group             | -P 1                                | -P 1                                |
| Moiety formula         | C <sub>23</sub> H <sub>19</sub> N O | C <sub>23</sub> H <sub>19</sub> N O |
| Sum formula            | C <sub>23</sub> H <sub>19</sub> N O | C <sub>23</sub> H <sub>19</sub> N O |
| Mr                     | 325.39                              | 325.39                              |
| Dx, g cm <sup>-3</sup> | 1.275                               | 1.275                               |
| Z                      | 2                                   | 2                                   |
| Mu (mm <sup>-1</sup> ) | 0.077                               | 0.077                               |
| F000                   | 344.0                               | 344.0                               |
| F000'                  | 344.13                              |                                     |
| h, k, lmax             | 10, 11, 14                          | 10, 11, 14                          |
| Nref                   | 3455                                | 3367                                |
| Tmin, Tmax             | 0.981, 0.986                        | 0.790, 1.000                        |
| Tmin'                  | 0.981                               |                                     |

Correction method= # Reported T Limits: Tmin=0.790 Tmax=1.000  
 AbsCorr = MULTI-SCAN

Data completeness= 0.975

Theta(max)= 26.364

R(reflections)= 0.0388( 2993)

wR2(reflections)= 0.0980( 3367)

S = 1.055

Npar= 227

CCDC 2099487
